# 1 **Multiscale modeling of presynaptic** 2 **dynamics from molecular to mesoscale**

3 *Mesoscale model of presynaptic dynamics based on MCell*

## 4 **Authors**

5 Jonathan W. Garcia<sup>1,2,3</sup>

6 Thomas M. Bartol<sup>2</sup>

7 Terrence J. Sejnowski<sup>1,2</sup>

## 8 **Affiliations**

9 <sup>1</sup> Division of Biological Sciences, University of California San Diego, La Jolla, CA 92093

10 <sup>2</sup> Computational Neurobiology Laboratory, Salk Institute for Biological Sciences, La Jolla, CA 92037

11 <sup>3</sup> Abbott Laboratories, Abbott Park, IL 60064

12

13

14

15

16

## 17 Abstract

18 Chemical synapses exhibit a diverse array of internal mechanisms that affect the dynamics of  
19 transmission efficacy. Many of these processes, such as release of neurotransmitter and vesicle  
20 recycling, depend strongly on activity-dependent influx and accumulation of  $\text{Ca}^{2+}$ . To model how each of  
21 these processes may affect the processing of information in neural circuits, and how their dysfunction  
22 may lead to disease states, requires a computationally efficient modelling framework, capable of  
23 generating accurate phenomenology without incurring a heavy computational cost per synapse.  
24 Constructing a phenomenologically realistic model requires the precise characterization of the timing  
25 and probability of neurotransmitter release. Difficulties arise in that functional forms of instantaneous  
26 release rate can be difficult to extract from noisy data without running many thousands of trials, and in  
27 biophysical synapses, facilitation of per-vesicle release probability is confounded by depletion. To  
28 overcome this, we obtained traces of free  $\text{Ca}^{2+}$  concentration in response to various action potential  
29 stimulus trains from a molecular MCell model of a hippocampal mossy fiber axon.  $\text{Ca}^{2+}$  sensors were  
30 placed at varying distance from a voltage-dependent calcium channel (VDCC) cluster, and  $\text{Ca}^{2+}$  was  
31 buffered by calbindin. Then, using the calcium traces to drive deterministic state vector models of  
32 synaptotagmin 1 and 7 (Syt-1/7), which respectively mediate synchronous and asynchronous release in  
33 excitatory hippocampal synapses, we obtained high-resolution profiles of instantaneous release rate, to  
34 which we applied functional fits. Synchronous vesicle release occurred predominantly within half a  
35 micron of the source of spike-evoked  $\text{Ca}^{2+}$  influx, while asynchronous release occurred more consistently  
36 at all distances. Both fast and slow mechanisms exhibited multi-exponential release rate curves, whose  
37 magnitudes decayed exponentially with distance from the  $\text{Ca}^{2+}$  source. Profile parameters facilitate on  
38 different time scales according to a single, general facilitation function. These functional descriptions lay  
39 the groundwork for efficient mesoscale modelling of vesicular release dynamics.

## 40 Author Summary

41 Most information transmission between neurons in the brain occurs via release of neurotransmitter  
42 from synaptic vesicles. In response to a presynaptic spike, calcium influx at the active zone of a synapse  
43 can trigger the release of neurotransmitter with a certain probability. These stochastic release events  
44 may occur immediately after a spike or with some delay. As calcium accumulates from one spike to the  
45 next, the probability of release may increase (facilitate) for subsequent spikes. This process, known as  
46 short-term plasticity, transforms the spiking code to a release code, underlying much of the brain's  
47 information processing. In this paper, we use an accurate, detailed model of presynaptic molecular  
48 physiology to characterize these processes at high precision in response to various spike trains. We then  
49 apply model reduction to the results to obtain a phenomenological model of release timing, probability,  
50 and facilitation, which can perform as accurately as the molecular model but with far less computational  
51 cost. This mesoscale model of spike-evoked release and facilitation helps to bridge the gap between  
52 microscale molecular dynamics and macroscale information processing in neural circuits. It can thus  
53 benefit large scale modelling of neural circuits, biologically inspired machine learning models, and the  
54 design of neuromorphic chips.

## 55 Introduction

56 Chemical synapses constitute the primary means of direct communication between neurons throughout  
57 the nervous system [1-3]. Neurotransmitters are stored in synaptic vesicles, which are docked to the  
58 plasma membrane of the axon terminal by soluble N-ethylmaleimide-sensitive factor attachment  
59 protein receptor (SNARE) complexes. Vesicle-membrane-bound synaptobrevin (v-SNARE) and the target-  
60 membrane-bound syntaxin and SNAP-25 (t-SNAREs) form energetic SNAREpin complexes where the  $\alpha$ -  
61 helices of the v-SNAREs entwine with those of the t-SNAREs [4-6]. Synaptotagmin (Syt) proteins

62 embedded in both membranes associate with the SNARE complex and act as  $\text{Ca}^{2+}$ -sensitive triggers for  
63 vesicle fusion. When the action potential of the presynaptic neuron reaches the axon terminal, it  
64 triggers a sudden influx of  $\text{Ca}^{2+}$  through voltage-dependent  $\text{Ca}^{2+}$  channels (VDCCs), and when a sufficient  
65 number  $\text{Ca}^{2+}$  ions binds to the  $\text{C}_2$  domains of synaptotagmin, it undergoes a conformational change that  
66 triggers the associated SNAREpin to zipper completely, causing the vesicle to fuse with the membrane  
67 and to release its neurotransmitter through the newly opened fusion pore [7-11] (see Fig 1).

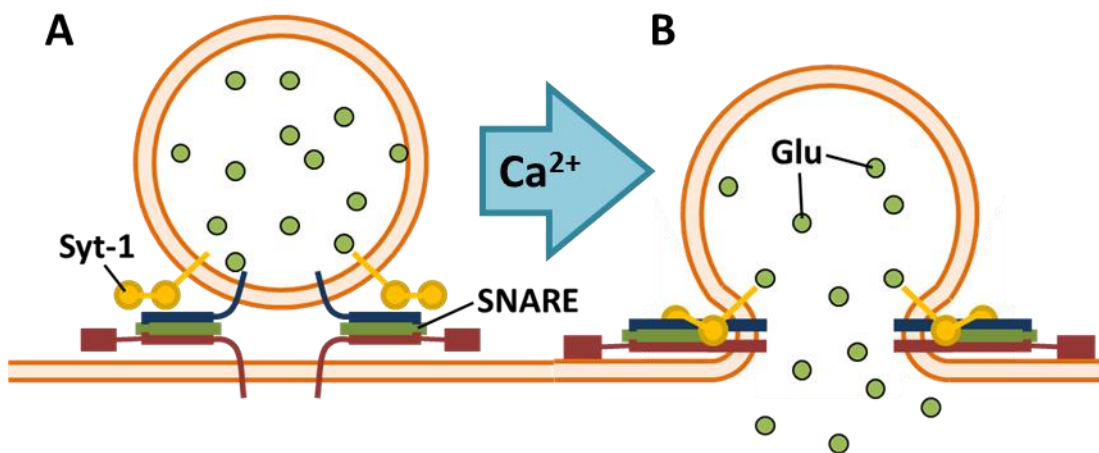

68

69 **Fig 1. SNARE Complex Structure and Dynamics.**

70 A: SNAREpins prior to vesicle fusion. B: Binding of  $\text{Ca}^{2+}$  to synaptotagmin (Syt-1 here, Syt-7 attaches to  
71 target membrane [12, 13]) triggers full zippering of SNARE complex and, in turn, vesicle fusion [14, 15].  
72

73 Very often, discussion of the activity in a network tends to focus on the action potentials (spikes) and  
74 subthreshold fluctuations in membrane potential [16-18]. The utility of these measurements, however,  
75 depends on the relevance of the spike code to neural information processing. How neurons integrate  
76 their inputs and generate signals in the context of larger neural circuits largely determines the sorts of  
77 computations that the network can perform [19, 20]. Biological neural networks need to represent  
78 information in a way that confers behavioral utility, but since so much of the information in the

79 environment is irrelevant to survival, synapses may not be optimized to transmit all information  
80 faithfully, but rather selectively.

81 Significantly, neurons do not directly see the spiking activity of their neighbors at chemical synapses, but  
82 only detect presynaptic activation upon the release of neurotransmitter, which is a stochastic process  
83 [21]. Synapses form the basis for learning and information processing, and short-term plasticity (STP)  
84 defines a transformation from a spiking code to a neurotransmitter release code. All spiking activity is  
85 filtered through the dynamics of probabilistic synaptic release before the rest of the network can see it.  
86 This implies that one must first have an accurate model of release dynamics in order to understand the  
87 true nature of information processing of brain circuits. Such a model could, for instance, provide a  
88 crucial preprocessing step of motor cortex for training BCI-based prosthetics [22-24], or it could enable  
89 more accurate computation of the information capacity of sensory cortex by studying the “language”  
90 that neurons actually receive rather than simply the output that they generate [19, 25-28].

91 Synaptic dysfunction has been implicated in numerous psychological disorders, including schizophrenia  
92 [29, 30], bipolar disorder [29], ASD [31], and fragile X syndrome [32]. To ascertain exactly what role  
93 synapses play and what specific mechanisms might be causing or exacerbating these diseases,  
94 controlled experiments would need to be performed on the brain circuits of interest, testing which  
95 changes to synaptic function might push the network into a pathological state. Doing this in humans  
96 would pose significant problems, both technical and ethical. However, with a computational model that  
97 exhibits sufficient realism and scalability, such experiments become possible in large simulated  
98 networks, which could provide important insight into what sorts of targeted therapies to explore for  
99 treating these diseases.

100 The molecular simulator MCell can track the kinetics and interactions of thousands of molecules and  
101 ions in a three-dimensional model of the synapse, achieving a high degree of realism and elucidating  
102 how complex bimolecular systems may function in the absence of experimental interventions [33-  
103 37]. When properly constrained by experimental data, MCell will not only automatically reproduce  
104 observed features such as asynchronous vesicle release, facilitation, and depression in the probability of  
105 release [35], but it can also make surprising predictions that are later confirmed through experiment  
106 [38, 39]. However, it quickly becomes too computationally expensive to scale up to the many synapses  
107 that exist even in relatively simple neural circuits.

108 The ultimate goal, therefore, is to develop a presynaptic model that captures realistic phenomenology  
109 while maintaining computational scalability. To that end, in this paper we develop a mathematical  
110 model that describes the phenomenology of presynaptic dynamics, using the MCell model of [35] as a  
111 reasonable approximation to ground truth. Our simplified model takes an arbitrary spike train and uses  
112 it to approximate the single-vesicle release rate histograms that would emerge from running an infinite  
113 number of MCell simulations, taking into account the facilitation in release rate of both synchronous and  
114 asynchronous release dynamics. The results are easily amenable to event-driven models, producing the  
115 generating distributions for temporally asynchronous vesicle release times with respect to arbitrary  
116 sequences of action potentials. Thus, it provides an avenue for large-scale simulations of spiking neural  
117 networks with many realistically performing synapses without incurring high computational costs,  
118 enabling investigations into how various presynaptic mechanisms can affect computation at the circuit  
119 level.

120

## 121 Results

### 122 **Ca<sup>2+</sup>-Evoked Dynamics of Vesicle Release**

123 Diffusion plays a key role in presynaptic processes. Simplified models of Ca<sup>2+</sup>-dependent presynaptic  
124 dynamics may assume that the axon terminal is locally well mixed, equivalent to saying that diffusion  
125 happens infinitely fast, at least relative to the spatial and temporal scales being studied. However, MCell  
126 allows one to add a spatial component to molecular simulations, which can account for certain  
127 phenomena that well mixed molecular kinetics models cannot capture [33, 34, 36]. To characterize the  
128 process of Ca<sup>2+</sup>-dependent neurotransmitter release, we based two models on the presynaptic model of  
129 [35]: a spatially explicit model implemented in MCell, and an equivalent “well-mixed” model. Both  
130 models contained voltage-dependent Ca<sup>2+</sup> channels (VDCCs) that let Ca<sup>2+</sup> ions into the presynaptic  
131 volume in response to an action potential stimulus, a calbindin (CB) buffer that moderated diffusion of  
132 the ions via its binding kinetics, and plasma membrane Ca<sup>2+</sup>-ATPase (PMCA) pumps that helped  
133 intracellular Ca<sup>2+</sup> concentration return to equilibrium over time (see S1 Fig for state transition diagrams).  
134 However, the two models differed in that the MCell model relied heavily on diffusion of molecular  
135 species through space and discrete state transition events occurring over time, while the well-mixed  
136 model treated all molecular interactions as occurring within the same point in space and tracked  
137 continuous state probabilities over time (see Methods).

138 Comparing these models, we found that the diffusion of Ca<sup>2+</sup> and calbindin through the axonal volume  
139 affects both the timing and the probability of spike-evoked vesicle release, depending on the distance  
140 from the Ca<sup>2+</sup> source. Fig 2 compares the well-mixed simulation without diffusion to the equivalent  
141 MCell simulations performed at multiple distances from the VDCC Ca<sup>2+</sup> source. The shape of the Ca<sup>2+</sup>  
142 transient measured in MCell displays marked qualitative differences from that obtained without

143 diffusion:  $\text{Ca}^{2+}$  sensors near the VDCC source see a much higher peak concentration with an extra  
144 component of decay immediately following the peak; those farther away progressively lose the fast  
145 peak until nothing is left but an extremely small distance-independent component. The extra  
146 component of the proximal  $\text{Ca}^{2+}$  curve, which does not appear in the well-mixed model, likely arises  
147 from local saturation in the nanodomains near the VDCC cluster, where the very high free  $[\text{Ca}^{2+}]_i$   
148 temporarily saturates both the calbindin buffer and the PMCA pumps [40]. Farther out, the MCell model  
149 qualitatively matches the well-mixed model more closely, until at very large distances, the fast  
150 components almost completely disappear. The distance-independent components represent a sustained  
151 global elevation in  $[\text{Ca}^{2+}]_i$  that persists due to the excess  $\text{Ca}^{2+}$  that has yet to unbind from the calbindin  
152 buffer. The slowest component has a magnitude comparable to resting  $[\text{Ca}^{2+}]_i$  and a time constant of  
153 around 1 second.

154



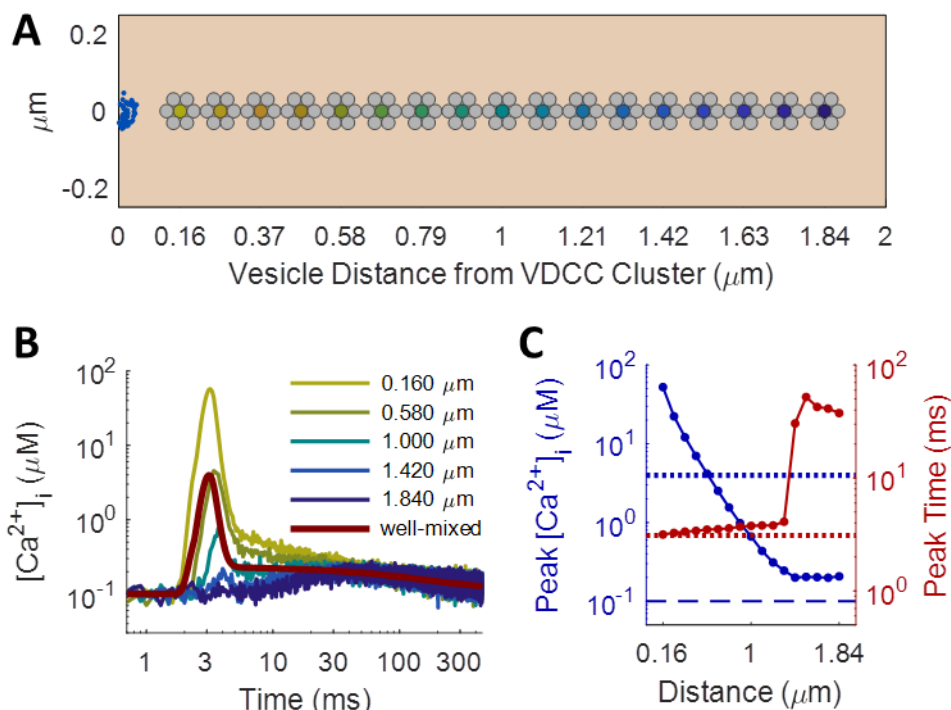

155

156

## Fig 2. Spatial Modeling of Spike-Evoked $\text{Ca}^{2+}$ Transients.

157 A:  $\text{Ca}^{2+}$  sensors (dark yellow through dark blue filled circles) at vesicle cluster centers, displaced linearly

158 from cluster of  $\text{Ca}^{2+}$  channels (blue half-disk on the left); distance in  $\mu\text{m}$ ,  $d_n = 0.160 + 0.105n$  for

159  $n \in \{0, \dots, 16\}$ . B:  $[\text{Ca}^{2+}]_i$  measured over time in MCell (dark yellow through dark blue) and in the

160 deterministic well-mixed model (maroon). MCell traces averaged from 2000 trials of MCell simulations

161 with  $\Delta t = 0.1$  ms. Color transitions from yellow for vesicles proximal to the VDCC  $\text{Ca}^{2+}$  source to blue for

162 vesicles far away, as in A. Proximally (distally) measured  $[\text{Ca}^{2+}]_i$  displays more (fewer) components of

163 decay than are evident in the deterministic model. C: Logarithmic plots of peak  $[\text{Ca}^{2+}]_i$  (blue) and peak

164 time (red) as a function of distance from  $\text{Ca}^{2+}$  source; peak  $[\text{Ca}^{2+}]_i$  drops off exponentially with distance

165 from VDCC cluster; amplitude of latent  $\text{Ca}^{2+}$  dominates over the initial action-potential-evoked influx

166 after 1.4  $\mu\text{m}$ .

167

168 One would expect the strength of spike-evoked neurotransmitter release to diminish with increasing

169 distance from the  $\text{Ca}^{2+}$  source, where  $\text{Ca}^{2+}$  has more time to diffuse and bind to buffer molecules before

170 reaching the sensor. In fact, numerous studies have found that vesicles of the readily releasable pool

171 (RRP) fall into one of two subpopulations, depending on their physical location of vesicles within the

172 synapse: vesicles located very near  $\text{Ca}^{2+}$  channels release quickly in response to spikes, while those

173 farther away are more reluctant [41-44]. To explore how the release rate profiles vary with distance, we

174 established a linear array of  $\text{Ca}^{2+}$  sensors along the length of the model axon, with a cluster of 50 VDCCs  
175 arranged in a half-disk at one end (Fig 2 A). Reflective boundaries on the ends of a 2- $\mu\text{m}$  tube effectively  
176 simulated the effects of having one cluster of 100 VDCCs every 4  $\mu\text{m}$ , consistent with previous models of  
177 the Schaffer collateral axon [35, 45]. Running the model again for 2000 trials, with a single action  
178 potential stimulus applied at the beginning, we obtained  $\text{Ca}^{2+}$  traces measured at each point along the  
179 axon. For the first 1.4  $\mu\text{m}$ , free  $\text{Ca}^{2+}$  from the initial influx dominated, and the peak concentration  
180 declined exponentially with distance (length constant 0.204  $\mu\text{m}$ ; Fig 2 C). Farther out, global  
181 accumulation and depletion of  $\text{Ca}^{2+}$  dominates, which, although spike-evoked, does not vary in  
182 magnitude with distance and acts over a much longer time scale and at a much lower level than most of  
183 the spike-triggered  $\text{Ca}^{2+}$ .

184 Running these simulations in MCell, rather than as a much simpler well-mixed model, was essential for  
185 capturing both distance-dependent effects and temporal features of the  $\text{Ca}^{2+}$  waveform. The well-mixed  
186 assumption, which ignores diffusion and treated all chemical processes as occurring at the same point in  
187 space, does not hold at the spatial and temporal scales of interest in the synapse [46, 47]. As seen in Fig  
188 2 C, peak  $\text{Ca}^{2+}$  dropped precipitously even over fractions of a micron away from the VDCC cluster, and  
189 the shape of the response changed dramatically over this same scale, transitioning from a  
190 predominantly synchronous to a predominantly asynchronous profile, even before the  $\text{Ca}^{2+}$  sensors  
191 started responding. These trends, elucidated by the spatial MCell model, were completely absent in the  
192 space-less well-mixed simulation (Fig 2 B, maroon line), even when all other aspects of the model  
193 remained the same, such as the number of VDCCs, calbindin buffer molecules, and PMCA pumps and  
194 the set of all state transitions for each molecular species (see Methods for details). Note also from Fig 2  
195 B that the transition in time from the fast synchronous component to the extended asynchronous  
196 component was much sharper in the case without space. The extra  $\text{Ca}^{2+}$  decay component arose from

197 local saturation effects. After the initial rapid influx, the calbindin buffer immediately around the VDCC  
198 cluster became saturated, causing the high free  $\text{Ca}^{2+}$  that remains to overwhelm the PMCA pumps'  
199 ability to evacuate it from the area. The pumps removed it at a constant maximum rate, leading to a  
200 short linear decay only evident very near the VDCCs (yellow traces, S4 Fig A) or when all calbindin is  
201 removed from the simulation (S5 Fig B). Such effects did not appear in the well-mixed case because all  
202 buffer molecules and pumps were simultaneously available to all the free  $\text{Ca}^{2+}$ , preventing any local  
203 saturation from occurring. Thus, in light of all these effects, the spatial MCell model was crucial for the  
204 task of properly characterizing the  $\text{Ca}^{2+}$  transient in the synapse.

205 Although many more proteins are involved in coordinating release kinetics at active zones [14, 15, 44,  
206 48-52], for validation purposes we restrict the scope of this paper to the function of synaptotagmins.  
207 The model of synaptotagmin-mediated release used in our simulations followed the dual  $\text{Ca}^{2+}$ -sensor  
208 model of Sun et al. [53], which includes mechanisms for both fast/synchronous and slow/asynchronous  
209 release. In excitatory hippocampal synapses, these synchronous and asynchronous modes of release  
210 may correspond to the roles of synaptotagmin-1 (Syt-1) and synaptotagmin-7 (Syt-7), respectively [54-  
211 59]. The model incorporates cooperative binding of  $\text{Ca}^{2+}$  to multiple sites on the sensor, requiring five  
212  $\text{Ca}^{2+}$  ions before triggering synchronous release and two  $\text{Ca}^{2+}$  ions for asynchronous release (see Fig 3).  
213 Because both binding and unbinding rates for the synchronous mechanism are substantially higher than  
214 those for the asynchronous mechanism, Syt-1 produces rapid release over a very narrow window  
215 relative to spike arrival time, while Syt-7 produces slow release over a much more extended window.  
216 Table 1 contains the values used in this model for  $\text{Ca}^{2+}$ -binding and unbinding rates with each release  
217 mechanism, along with the rates of vesicle fusion from the fully bound states ( $\gamma_S$  and  $\gamma_A$ ) and the time  
218 constant for the post-release refractory period ( $\varepsilon$ ) [60, 61], which features in the Nadkarni et al. [35]  
219 MCell model.

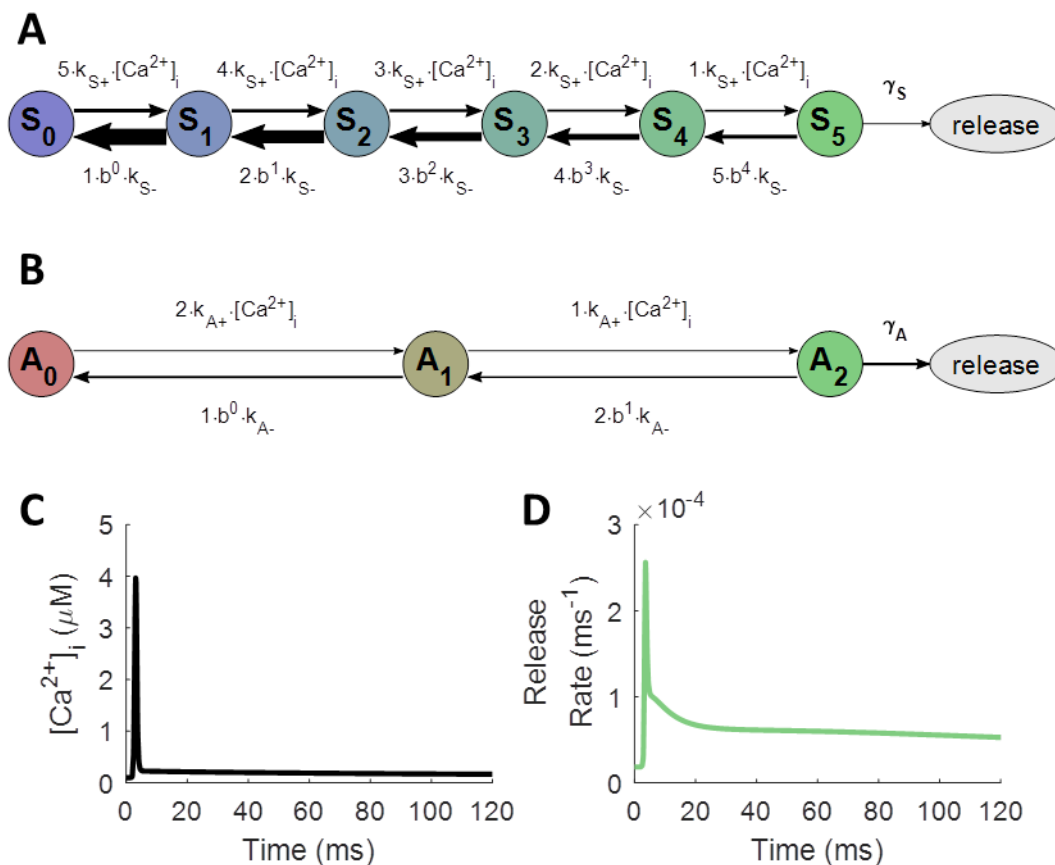

220  
 221 **Fig 3. Model of  $Ca^{2+}$ -Evoked, Synaptotagmin-Mediated Neurotransmitter Release.**  
 222 A, B: Model adapted from Sun et al. [53].  $\gamma_S$  and  $\gamma_A$  represent rates of vesicle fusion from the releasable  
 223 states of the synchronous and asynchronous mechanisms, respectively. A:  $Ca^{2+}$ -bound states for Syt-1  
 224 (synchronous release);  $S_n$  indicates  $n$   $Ca^{2+}$  ions bound to the synchronous release mechanism. B:  $Ca^{2+}$ -  
 225 bound states for Syt-7 (asynchronous release);  $A_n$  indicates  $n$   $Ca^{2+}$  ions bound to the asynchronous  
 226 release mechanism. C, D: Action-potential-like stimulus delivered to model axon starting at 0 ms.  
 227 Diffusion is assumed to be instantaneous, and molecular state probabilities are tracked deterministically  
 228 over time. C: Free  $[Ca^{2+}]_i$  in response to single action potential. D: Instantaneous vesicle release rate in  
 229 response to buffered  $Ca^{2+}$  from both synaptotagmin-mediated release mechanisms.  
 230

231 **Table 1. SNARE Release State Transition Parameters.**

232 Values taken from Nadkarni et al. [35], adapted from Sun et al. [53].

|            | synchronous                                    | asynchronous                                            | other parameters   |
|------------|------------------------------------------------|---------------------------------------------------------|--------------------|
| $k_{S+}$   | $6.12 \times 10^7 \text{ M}^{-1}\text{s}^{-1}$ | $k_{A+}$ $3.82 \times 10^6 \text{ M}^{-1}\text{s}^{-1}$ | $b$ 0.25           |
| $k_{S-}$   | $2.32 \times 10^3 \text{ s}^{-1}$              | $k_{A-}$ $13 \text{ s}^{-1}$                            | $\epsilon$ 6.34 ms |
| $\gamma_S$ | $6.0 \times 10^3 \text{ s}^{-1}$               | $\gamma_A$ $50 \text{ s}^{-1}$                          |                    |

233

234 The MCell model, because it tracks thousands of individual particles through Markov chain Monte Carlo  
235 simulations [33, 34, 36], can both capture very realistic synaptic dynamics and uncover their underlying  
236 molecular causes, which would be difficult to obtain through other methods. Unfortunately, this realism  
237 can also obscure the patterns necessary for building simplified models. First, many processes, such as  
238 asynchronous or “mini” release events [62-64], occur slowly enough that many thousands or millions of  
239 simulated trials would be required to uncover precise functional descriptions, which could become  
240 computationally prohibitive. For instance, the histograms of synchronous release obtained from 2000  
241 trials of MCell in Fig 4 offer little information on spontaneous release from the Syt-1 mechanism  
242 between action potentials, and synchronous release far from the VDCC cluster (blue) hardly occurs at all.  
243 Second, the fact that vesicles deplete upon release hides how the instantaneous single-vesicle release  
244 rate actually changes with time. The tails of the release distributions fall off too quickly as vesicles are  
245 removed from the simulation over time, and any paired-pulse facilitation (PPF) in single-vesicle release  
246 probability is countered by the release-dependent depletion in the model (Fig 4 D).

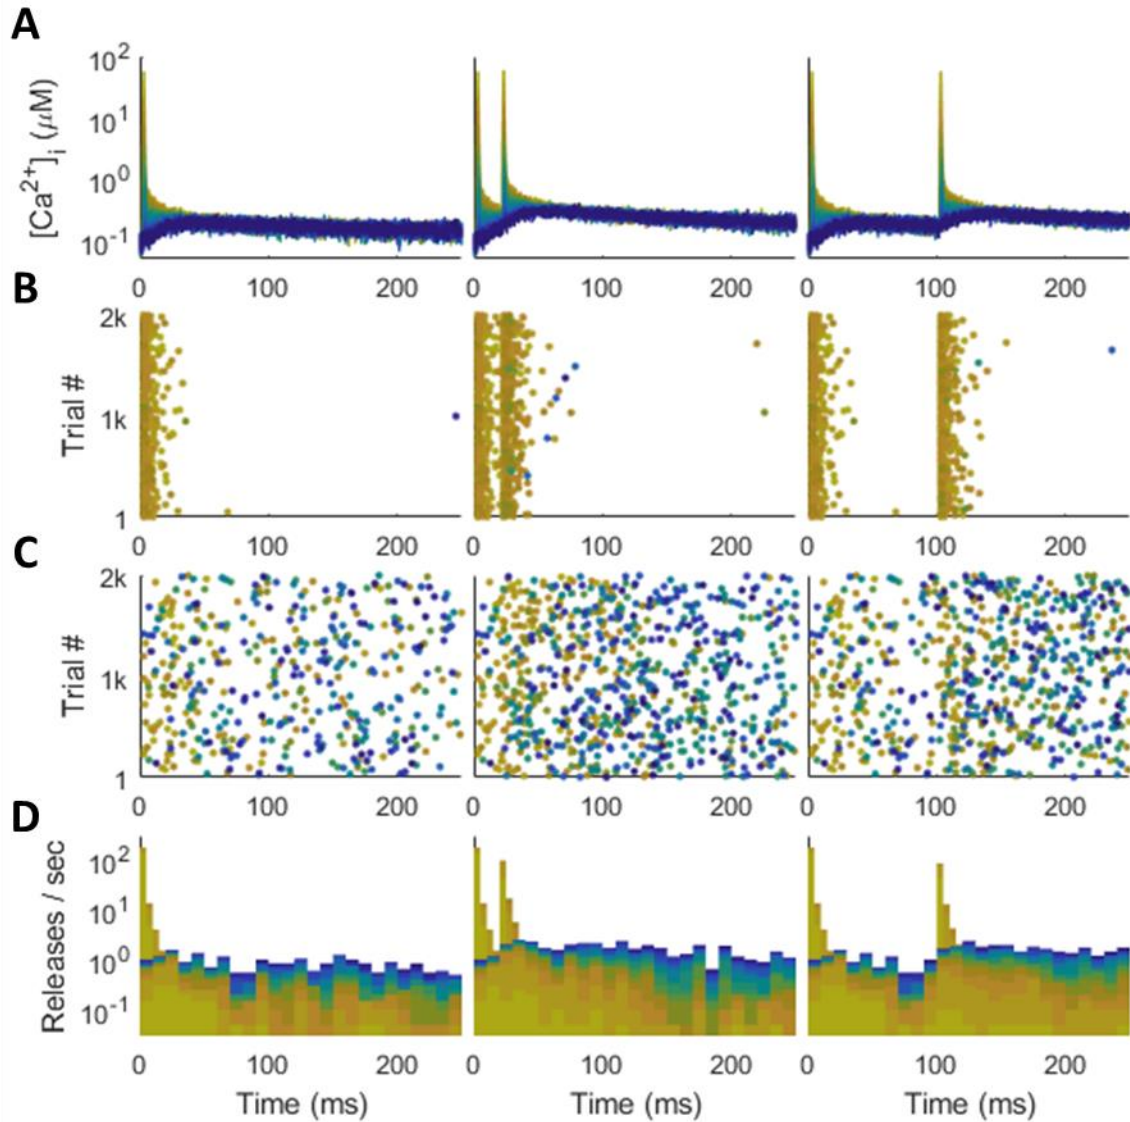

247

248 **Fig 4. Synchronous and Asynchronous Release in MCell.**

249 Color indicates distance from VDCC source, with yellow representing a nearby  $\text{Ca}^{2+}$  sensor and dark blue  
250 a distant one (as in Fig 2 A-B). Action-potential-like stimulus delivered at 0 ms (left), followed by another  
251 at 20 ms (center) and 100 ms (right). A: Spike-evoked  $\text{Ca}^{2+}$  traces that drive release. B: Synchronous  
252 release raster. C: Asynchronous release raster. D: Synchronous (tall, thin bars) and asynchronous (short,  
253 wide bars) release stacked histogram. Most synchronous releases happen close to the  $\text{Ca}^{2+}$  source;  
254 asynchronous releases distributed across all distances.

255

256 The only way to avoid these depletion effects in MCell would be to run many millions of trials with a

257 single vesicle to track how the vesicle's alacrity for release fluctuates with the  $\text{Ca}^{2+}$  history detected at its

258 position. For these reasons, we decided not to depend on the release histograms generated by many  
259 trials of MCell for building a phenomenological model. Instead, we used the  $\text{Ca}^{2+}$  traces generated by  
260 MCell, which do not suffer from the aforementioned problems, to drive deterministic simulations of the  
261 SNARE state probability dynamics (as described in Methods), effectively producing what an infinite  
262 number of trials would produce in MCell with the same  $\text{Ca}^{2+}$  data. Thus, using the deterministic release  
263 rates driven by the stochastic MCell  $\text{Ca}^{2+}$  data balances the necessary realism of MCell with the  
264 smoothness and insights required for designing a versatile phenomenological model.

## 265 **Reducing from Molecular Simulations to Phenomenological Model**

266 By driving a deterministic simulation of SNARE dynamics with the  $[\text{Ca}^{2+}]_i$  waveform obtained from MCell,  
267 one can see that each release mechanism induces vesicle fusion with a histogram that essentially  
268 follows a multi-exponential form (Fig 5). The release rate profiles ( $r(t)$ , where  $r \in \{S, A\}$  may refer to  
269 synchronous or asynchronous release rate) rise quickly from baseline after the spike and decay with  
270 several exponential components, approximated as

$$r(t) = r_0 + \sum_{c=1}^N \frac{P_c}{\tau_c} e^{-t/\tau_c} u(t), \quad (1)$$

271 where  $r_0$  is the spontaneous release rate (related to “mini”-EPSCs [63-65];  $S_0 = 5.70 \times 10^{-9} \text{ms}^{-1}$ ;  
272  $A_0 = 1.84 \times 10^{-5} \text{ms}^{-1}$ ),  $t$  is the time since the last spike,  $u(t)$  is the Heaviside step function (so that  
273 release occurs only for  $t \geq 0$ ),  $N$  is the number of exponential decay components,  $\tau_c$  are the time  
274 constants of exponential decay, and  $P_c$  are the expected number of releases from each component for a  
275 single vesicle. Note that because the release rate profile is not a probability distribution, but rather it  
276 represents the instantaneous rate of release conditioned on having not released yet (see Methods), its  
277 integral  $P_c$  can potentially exceed one (just as the integral over the spontaneous component  $r_0$  for  
278  $t = 0 \dots \infty$  is infinite). The probability that the exponential component causes release at any point in

279 time, ignoring the other components, is  $p_{rc} = 1 - \exp(-P_c)$  (and the integrated release probability for  
280 the spontaneous component is  $p_{r0} = 1 - \exp(-\infty) = 1$ ). The existence of multiple exponential  
281 components is apparent from the linear segments visible in log-linear space for synchronous and  
282 asynchronous release rates in Fig 5 B. To calculate the time constants of exponential decay (Fig 5 C), we  
283 used the slope of the logarithm of the release rate curve according to

$$\tau(t) = - \left( \frac{d}{dt} [\ln(r^*(t) - r^*(0))] \right)^{-1}, \quad (2)$$

284 where  $\tau(t)$  is the instantaneous time constant and  $r^*(t)$  is the observed instantaneous release rate. We  
285 used the well-mixed model for the derivative calculation because it had no noise in the release rate  
286 profiles.

287

288



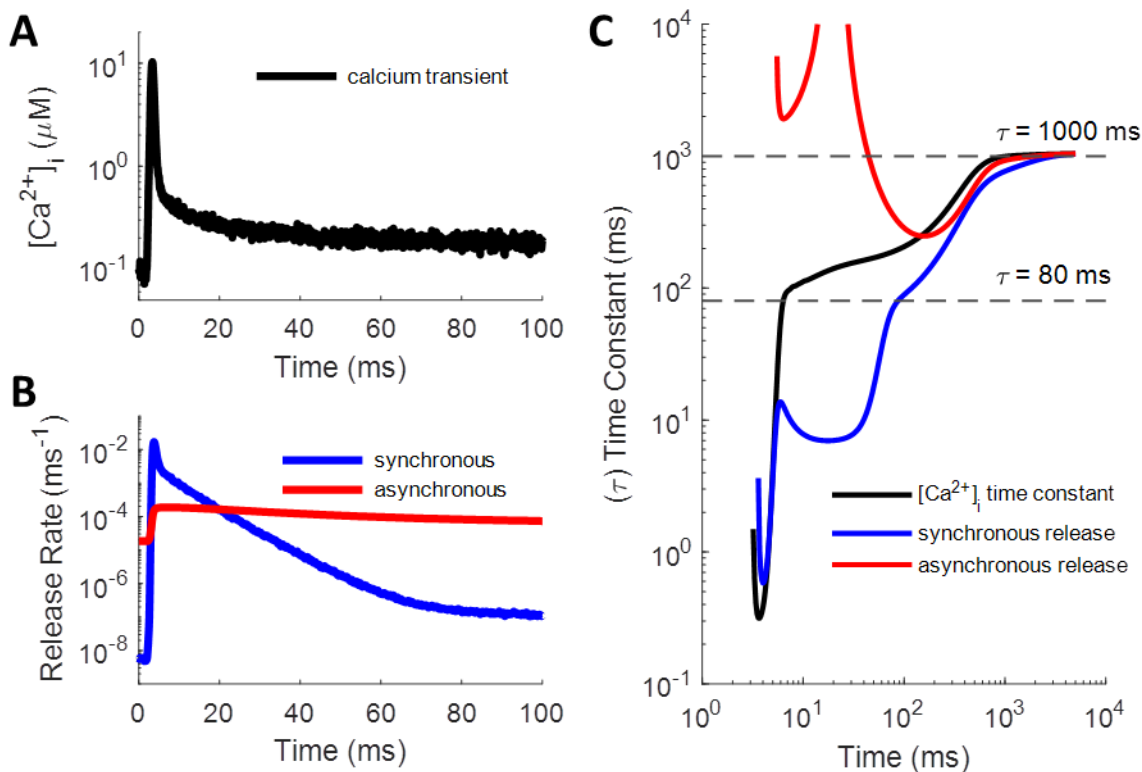

289  
290  
291  
292  
293  
294  
295  
296  
297  
298

**Fig 5. Multi-Exponential Shape of  $\text{Ca}^{2+}$ -Driven Vesicle Release Rate.**

A, B: Plots given as semi-log to highlight exponential decay components (straight line segments of profiles). A: A single, spike-evoked  $[\text{Ca}^{2+}]_i$  transient, which drives B: the synchronous and asynchronous release rates. C: Instantaneous time constants for  $\text{Ca}^{2+}$ , synchronous, and asynchronous curves, calculated from the well-mixed model (see Eq (2)). Long release rate time constants (around 80 ms and 1000 ms; dashed lines) follow  $\text{Ca}^{2+}$  curve due to slow un-buffering of latent  $\text{Ca}^{2+}$ . Asynchronous starts high because fast and slow components have comparable magnitude and become conflated; it goes up to infinity where additive effects cause the curve to flatten.

299 Most of the  $\text{Ca}^{2+}$  that enters the axon following an action potential quickly binds with the calbindin  
300 buffer before diffusing to the SNARE complex, causing a narrow spike in the free  $[\text{Ca}^{2+}]_i$  available to the  
301 release mechanism. Therefore, most of the spike-evoked release occurs in response to this narrow  
302 window of influx. To test how each release mechanism responds to transient  $\text{Ca}^{2+}$  spikes, we supplied an  
303 instantaneous burst of  $\text{Ca}^{2+}$  to a single time step of the deterministic model, allowing us to measure the  
304 impulse-response function. These simulations were repeated for various resting  $\text{Ca}^{2+}$  levels ( $[\text{Ca}^{2+}]_{i0}$ ),  
305 ranging from 0 to 10  $\mu\text{M}$ , to see how the presence of  $\text{Ca}^{2+}$  at equilibrium affects the response to spike-

306 evoked transients. As Fig 6 shows, when there is no resting  $[Ca^{2+}]_i$ , the rate of release for both  
307 synchronous and asynchronous mechanisms rises quickly in response to a sudden influx before dropping  
308 exponentially with a single exponential component (black). However, when  $[Ca^{2+}]_{i0}$  settles at some level  
309 greater than zero, an extra exponential component emerges for both mechanisms (blue and red lines).  
310 The exponential decay time constants seem to be mostly independent of resting  $[Ca^{2+}]_{i0}$  at low levels,  
311 but they drop off more quickly as spontaneous release rates begin to overtake the spike-evoked rates at  
312 high concentrations. The extra component emerges as a result of the back-and-forth  $Ca^{2+}$ -binding and  
313 unbinding processes, where finite baseline  $[Ca^{2+}]_{i0}$  likely provides a “floor” to “bounce off of” in terms of  
314 the number of  $Ca^{2+}$  ions bound to the release mechanism. Note, however, that even though it depends  
315 on equilibrium  $[Ca^{2+}]_{i0}$ , this secondary release component is still purely spike-evoked and arises due to  
316 the nonlinearity of the system. The baseline rate  $r^*(0)$  was subtracted off to ensure that the function  
317 approached zero prior to taking the logarithm (dotted lines). Time constants in Fig 6 C were calculated  
318 using Eq (2).

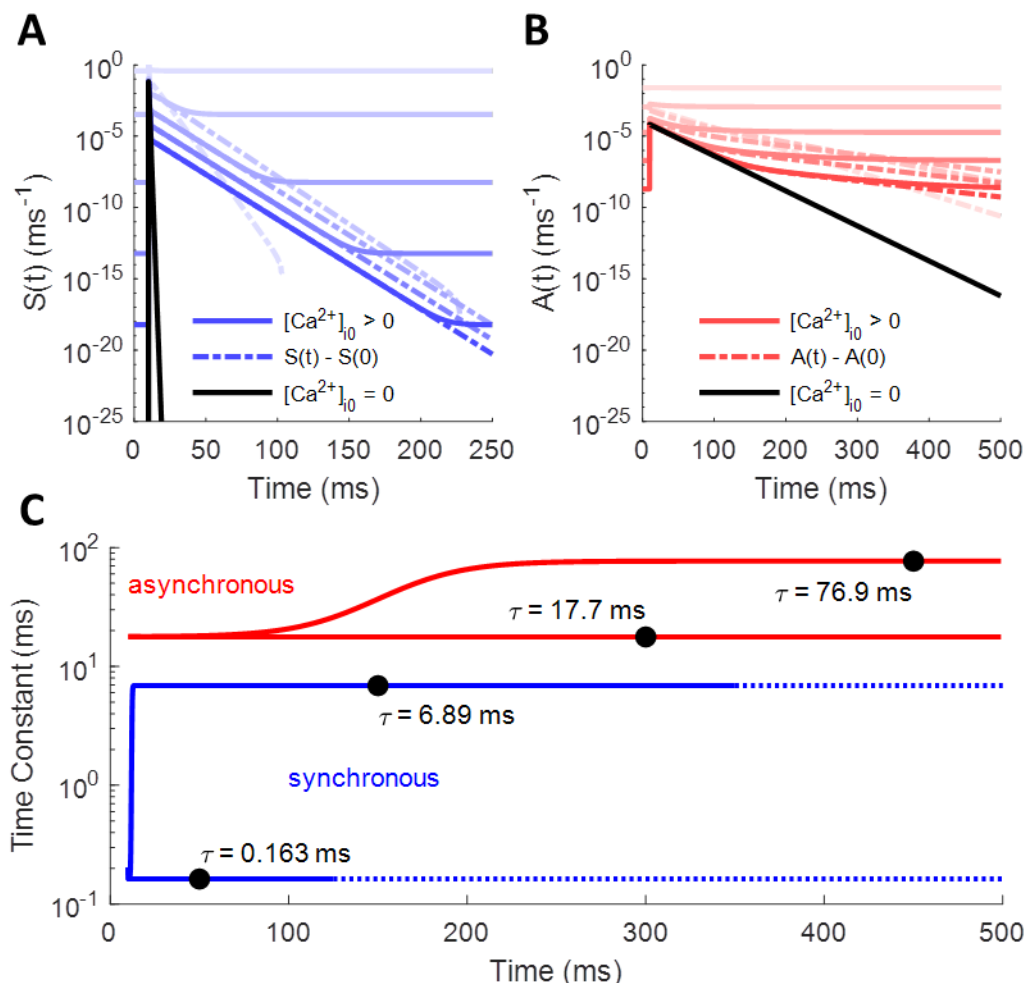

319  
 320 **Fig 6. Synchronous and Asynchronous Release Rates in Response to  $\text{Ca}^{2+}$  Impulse at**  
 321 **Different Resting Concentrations.**

322 Instantaneous impulse of  $\text{Ca}^{2+}$  delivered at 10 ms. Solid lines represent true release rate; dotted lines  
 323 have spontaneous rates subtracted off to show secondary exponential components. Black lines show  
 324 release rate decaying with a single exponential component with no baseline  $[\text{Ca}^{2+}]_i$ . For other curves,  
 325  $[\text{Ca}^{2+}]_{i0}$  ranges from 0.001  $\mu\text{M}$  to 10  $\mu\text{M}$ . A: Synchronous release rate over time:  $S(t)$ . B: Asynchronous  
 326 release rate over time:  $A(t)$ . C: Instantaneous release rate decay time constants for synchronous and  
 327 asynchronous mechanisms. Fast components (lower blue and red lines) determined from profiles with  
 328  $[\text{Ca}^{2+}]_{i0}=0$  (black lines in A and B). Slower components (upper blue and red curves) determined from  
 329 cases with small  $[\text{Ca}^{2+}]_{i0}$ .

330

331 From the above, it would seem that each mechanism should have three components to its release

332 histogram: a constant spontaneous rate that increases with  $[\text{Ca}^{2+}]_{i0}$ , a fast exponential component that

333 acts in response to an impulse of spike-evoked  $\text{Ca}^{2+}$ , and a slower spike-evoked component that results

334 from a “rebound” interaction with the  $\text{Ca}^{2+}$  floor. However, the profiles of the release rate histograms  
335 display more complexity than this, which will be discussed in more detail below. Significantly,  $[\text{Ca}^{2+}]_i$   
336 does not drop instantly to baseline after the initial influx, but some leftover  $\text{Ca}^{2+}$  continues to have a  
337 small effect over a long time window as it slowly unbinds from the calbindin buffer (see S5 Fig). This  
338 allows a small but noticeably enhanced rate of release efficacy to continue out to hundreds or  
339 thousands of milliseconds before returning fully to baseline (within noise). Fig 5 C shows the effect that  
340 this latent  $\text{Ca}^{2+}$  has on producing longer time constants in the decay of the release rate profiles, using  
341 the smooth curves obtained from the well-mixed model.

342 Of course, neurotransmitter release cannot begin at exactly the moment of the spike, both because the  
343 action potential itself is not an instantaneous process and because it takes finite time for  $\text{Ca}^{2+}$  to diffuse  
344 from the VDCC source, through the buffer, to the  $\text{Ca}^{2+}$  sensor in the SNARE complex. MCell represents  
345 this complex process with a Markov chain Monte Carlo method (MCMC). Because of this, the release  
346 process cannot begin until the spike-evoked  $\text{Ca}^{2+}$  arrives, which time may vary randomly relative to the  
347 timing of the spike. Thus, the process of buffered diffusion acts as a temporal filter on the release  
348 dynamics, transforming the equation of release to

$$r(t) = r_0 + \sum_{c=1}^N \frac{P_c}{\tau_c} \left( e^{-t/\tau_c} u(t) \right) * a(t; k_c, \mu_c, \sigma_c), \quad (3)$$

349 where  $a(\cdot)$  is the temporal filter and  $k_c$ ,  $\mu_c$ , and  $\sigma_c$  are parameters to be discussed below. The  
350 convolution operation effectively smears the start time of the average release profile in a way that  
351 accounts for random temporal jitter across trials.

352 Importantly, the release-start-time filter  $a(\cdot)$  must integrate to one over all real numbers. That way, it  
353 does not affect the probability of release, only its timing. The temporal filter chosen is an ex-Gaussian

354 distribution, resulting from the convolution of an exponential distribution of rate  $k$  with a normal  
355 distribution of mean  $\mu$  and standard deviation  $\sigma$ :

$$\begin{aligned} a(t; k, \mu, \sigma) &= \left( ke^{-kt} u(t) \right) * \left( \frac{1}{\sigma\sqrt{2\pi}} e^{-\frac{(t-\mu)^2}{2\sigma^2}} \right) \\ &= \int_{-\infty}^t ke^{-k(t-t')} \frac{1}{\sigma\sqrt{2\pi}} e^{-\frac{(t'-\mu)^2}{2\sigma^2}} dt' \\ &= ke^{-k\left(t - \left(\mu + \frac{\sigma^2}{2}k\right)\right)} \Phi\left(\frac{t - (\mu + \sigma^2 k)}{\sigma}\right), \end{aligned} \quad (4)$$

356 where  $\Phi(\cdot)$  represents the CDF of the zero-mean, unit-variance normal distribution. In the limit where  
357  $\sigma \rightarrow 0$ , this CDF simply becomes the shifted Heaviside step function  $u(t - \mu)$ , and  $a(t; k, \mu, \sigma) \rightarrow$   
358  $ke^{-k(t-\mu)}u(t - \mu)$ , which is just a rightward shift in time of the exponential distribution by  $\mu$ . The values  
359 of  $\mu$  and  $\sigma$  result from the sum of the delays caused by numerous random processes, including the  
360 timing of  $\text{Ca}^{2+}$  entry relative to the spike, the accumulation of collision events during Brownian motion,  
361 and the binding/unbinding events with the calbindin buffer and SNARE complex. Assuming that the  
362 individual events of the buffered diffusion process are numerous and similar enough for a given spike,  
363 the central limit theorem states that the sum of their delays should approximate a normal distribution  
364 [66]. The value of  $k$  represents the rate of some limiting step in the process of buffered diffusion, and it  
365 slows with increasing distance between the VDCC source and the  $\text{Ca}^{2+}$  sensor in the SNARE complex.  
366 Keep in mind that these parameters constitute only a phenomenological approximation to the exact  
367 filter, but they work well enough for the purposes of this paper.

368 For an event-driven model, which this paper is working towards, the convolutional operation can be  
369 implemented by sampling a normally distributed random number (with mean and standard deviation  $\mu_c$   
370 and  $\sigma_c$ ) and an exponentially distributed random number (with rate  $k_c$ ) and adding them to the spike  
371 time to determine the start time for the release response. In other words, combine the spike time with

372 an ex-Gaussian random delay to determine when the release component begins to respond to the spike,  
373 following Eq (1). In aggregate, across many trials with the same spike time, the release histogram will  
374 approach Eq (3).

375 With the mathematical description of the release rate profiles in mind, we ran a fitting algorithm (see  
376 Methods) to determine the values of the parameters for each profile. Initially, we used release profiles  
377 driven by  $\text{Ca}^{2+}$  measured at 400 nm from the cluster of 100 VDCCs, which provides a physiologically  
378 realistic probability of release for a single vesicle (around 0.04) [67]. The synchronous release  
379 mechanism exhibits more exponential decay components in its release rate histogram than does the  
380 asynchronous mechanism (4 versus 3), likely because it has more  $\text{Ca}^{2+}$  binding sites (5 versus 2) and  
381 because it operates on a faster time scale. Fig 7 shows how the fitted parametric release profiles match  
382 the simulated release profiles to within noise across multiple orders of magnitude; the noise in the  
383 simulated profiles was due to fluctuations in  $[\text{Ca}^{2+}]$  at the  $\text{Ca}^{2+}$  sensor. Table 2 lists the values of the best-  
384 fit profile parameters.

385

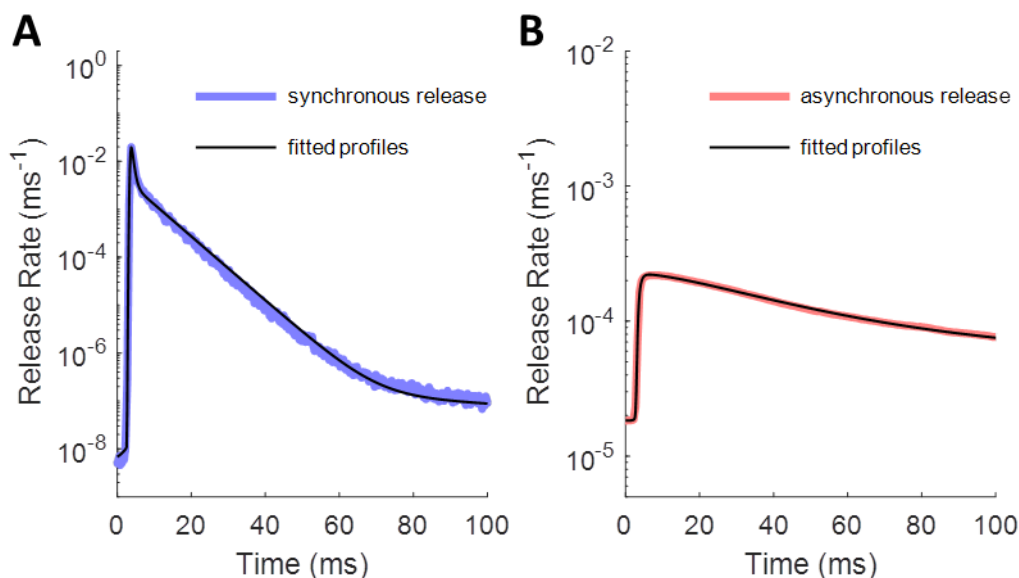

386  
387 **Fig 7. Fitted Release Rate Histogram Profiles for a Single Spike.**  
388 Parameter values given in Table 2. A: Synchronous release rate: true histogram (blue) with estimated  
389 histogram (black). B: Asynchronous release rate: true histogram (red) with estimated histogram (black).  
390

391 **Table 2. Spike-Evoked Release Rate Parameters.**

392 Parameter values calculated for a single spike following a period of low activity. Valid for  $\text{Ca}^{2+}$ -sensitive  
393 synchronous and asynchronous release mechanisms located 400 nm from a cluster of 100 VDCCs.

| component | $P$                   | $\tau$   | $k$                      | $\mu$   | $\sigma$  |
|-----------|-----------------------|----------|--------------------------|---------|-----------|
| $S_1$     | 0.0175                | 0.163 ms | $1.79 \text{ ms}^{-1}$   | 3.41 ms | 0.168 ms  |
| $S_2$     | 0.0220                | 6.50 ms  | $18.0 \text{ ms}^{-1}$   | 3.56 ms | 0.0977 ms |
| $S_3$     | $1.70 \times 10^{-5}$ | 80.0 ms  | $0.526 \text{ ms}^{-1}$  | 10.0 ms | 4.44 ms   |
| $S_4$     | $1.10 \times 10^{-5}$ | 1000 ms  | $0.142 \text{ ms}^{-1}$  | 50.0 ms | 11.5 ms   |
| $A_1$     | $3.72 \times 10^{-3}$ | 17.7 ms  | $1.60 \text{ ms}^{-1}$   | 3.05 ms | 0.243 ms  |
| $A_2$     | 0.0111                | 76.9 ms  | $0.0759 \text{ ms}^{-1}$ | 4.00 ms | 1.14 ms   |
| $A_3$     | 0.0136                | 1000 ms  | $0.0337 \text{ ms}^{-1}$ | 76.5 ms | 21.9 ms   |

394  
395 Keep in mind that the  $\mu$  values are somewhat arbitrary in that they depend on exactly when during the  
396 action potential that the spike time is taken to occur. Action potential waveforms last a couple of

397 milliseconds (see S2 Fig) [68]; the values for  $\mu$  above used a point on the action potential waveform  
398 immediately prior to the rising phase as the spike time. Using the peak of the action potential would  
399 take away about 2 ms from all values of  $\mu$ . Again, the time point along the action potential where the  
400 spike is counted is arbitrary, but it must be consistent across all components.

## 401 **Combining Release Profiles for Multiple Spikes**

402 Having established the shape of the release profile for a single spike, we considered how the release  
403 profiles of multiple spikes in a train would combine. Consider first the case of two spike times,  $t_{s1}$  and  $t_{s2}$   
404 (where  $t_{s2} > t_{s1}$ ). After the first spike, the release mechanism will respond to a  $\text{Ca}^{2+}$  influx after some  
405 delay with the release profile of Eq (1) shifted in time by  $t_{Ca1}$ , where the delay between the spike time  
406 and the arrival of the  $\text{Ca}^{2+}$  influx is distributed according to the ex-Gaussian temporal delay filter:

$$t_{Ca1} - t_{s1} \sim a(t - t_{s1}; k, \mu, \sigma). \quad (5)$$

407 Fig 8 A-C shows visually how this temporal delay filter affects a given release profile component.



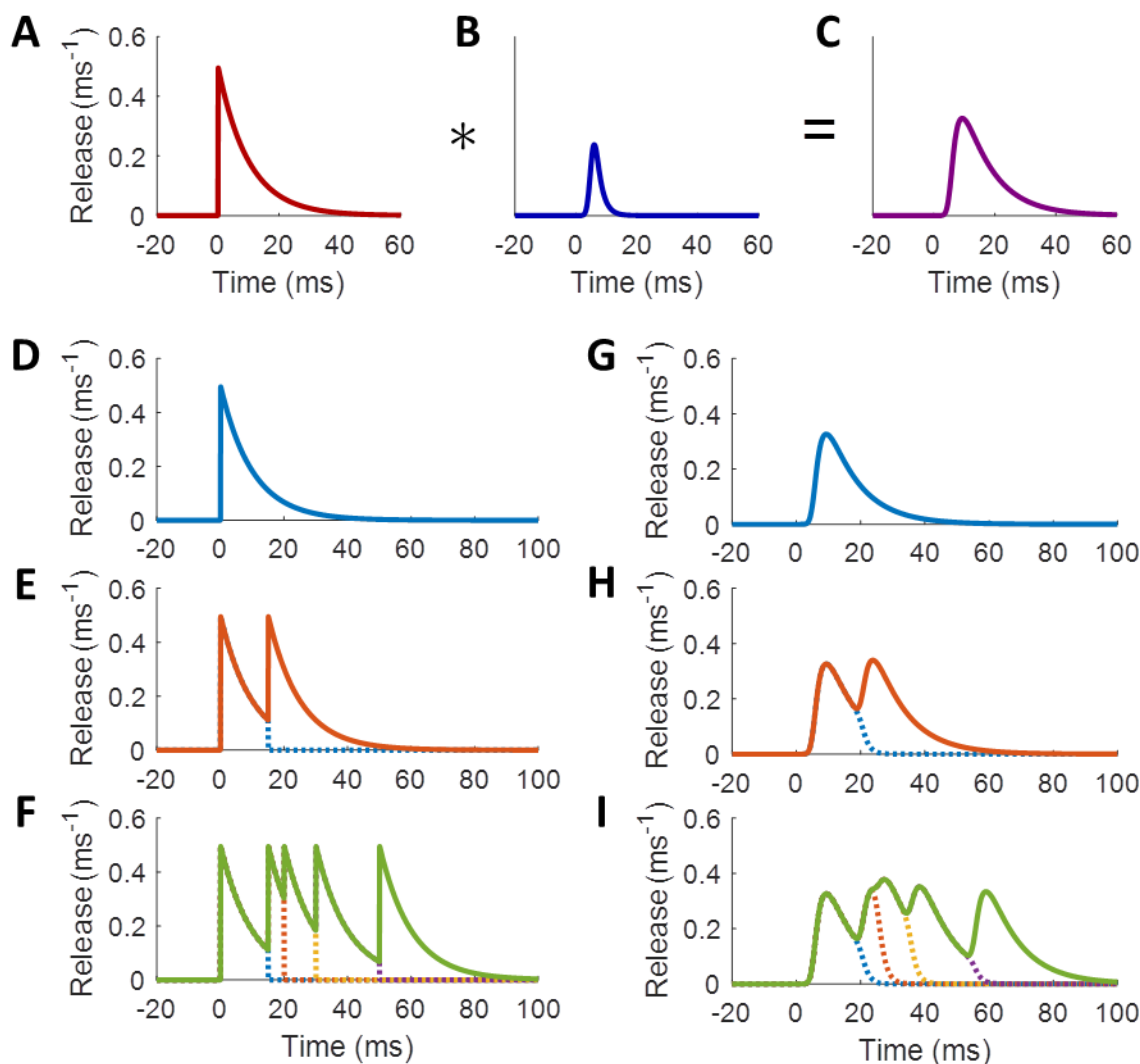

408  
 409 **Fig 8. Convolutional Filter Applied to a Component of a Release Rate Function.**  
 410 Toy model with  $P=5$ ,  $\tau=10$  ms,  $k=0.5$   $\text{ms}^{-1}$ ,  $\mu=5$  ms, and  $\sigma=1$  ms. A: Unfiltered release rate component. B: MCMC ex-Gaussian filter shape. C: Filtered release profile produced by convolving the release rate  
 412 profile with the temporal delay filter. D-F: Release rates in response to spike trains without applying  
 413 delay filter. G-I: Release rates in response to spike trains with delay filter applied. D,G: Response to one  
 414 spike. E,H: Response to two spikes. F,I: Response to multiple spikes. Dotted lines show how the  
 415 histogram of response to one spike falls off with interference from the response to the following spike.  
 416 Spike times at 0, 15, 20, 30, and 50 ms.  
 417

418 When the second spike arrives at the release site, the VDCCs produce another influx of  $\text{Ca}^{2+}$  that can  
 419 again propagate to the SNARE complex, building on the  $\text{Ca}^{2+}$  from the first spike. The buffered diffusion  
 420 again involves an ex-Gaussian-distributed delay, after which the release mechanism starts responding to

421 the second spike at time  $t_{Ca2}$ . With a future event-driven simulator in mind, we treated the arrival of  $Ca^{2+}$   
 422 from the second spike as a transition point between release-time generating functions. That is, the  
 423 synapse stops generating release times in response to the first spike (whose release profile was shifted  
 424 by  $t_{Ca1}$ ) and starts generating release times in response to the second spike (with a release profile shifted  
 425 by  $t_{Ca2}$ ), according to

$$\begin{aligned}
 r(t; \{t_{Ca1}, t_{Ca2}\}) &= r_0 + \sum_{c=1}^N \frac{P_c}{\tau_c} e^{-(t-t_{Ca1})/\tau_c} u(t-t_{Ca1})(1-u(t-t_{Ca2})) \\
 &+ \sum_{c=1}^N \frac{P_c}{\tau_c} e^{-(t-t_{Ca2})/\tau_c} u(t-t_{Ca2}) \\
 &= r(t-t_{Ca1})(1-u(t-t_{Ca2})) + r(t-t_{Ca2}),
 \end{aligned} \tag{6}$$

426 where  $r(t)$  is the unfiltered release profile from Eq (1). Notice that Eq (6) does not account for facilitation  
 427 yet. In this section, we focus on the interaction of individual spikes' release profiles, reserving the  
 428 discussion of facilitation for the next section. For a spike train with an arbitrary number of spikes, this  
 429 becomes

$$r(t; \mathcal{J}_{Ca}) = \sum_{t_{Cai} \in \mathcal{J}_{Ca}} \left( r(t-t_{Cai}) \prod_{\substack{t_{Caj} \in \mathcal{J}_{Ca} \\ t_{Caj} > t_{Cai}}} (1-u(t-t_{Caj})) \right), \tag{7}$$

430 where  $\mathcal{J}_{Ca} = \{t_{Ca1}, t_{Ca2}, \dots\}$  is the set of all  $Ca^{2+}$  arrival times, each resulting from the combination of a  
 431 spike time with an ex-Gaussian-distributed delay. Fig 8 D-F shows what these profiles should look like for  
 432 a certain set of parameters in response to various spike trains.

433 While the above formulation relies on fixed delay times, an event-driven simulator will need to sample  
 434 new delay times on every trial for a given spike train, as well as different delay times for each release  
 435 component. Therefore, we calculated the probability  $D_c(t)$  that the  $Ca^{2+}$  sensor has begun responding

436 to the  $\text{Ca}^{2+}$  from the latest spike for release component  $c$ , allowing for a gradual switch from one spike-  
 437 evoked release profile to the next, taking into account the variation of delay among all possible trials.  
 438 For two spike times,  $t_{s1} < t_{s2}$ , the net release profile for each component of Eq (6) becomes

$$r_c(t; \{t_{s1}, t_{s2}\}) = r_c(t - t_{s1})(1 - D_c(t - t_{s2})) + r_c(t - t_{s2}). \quad (8)$$

439 In other words, the response to the first spike is cut short after the second spike by  $D_c(\cdot)$  to give way to  
 440 the new release response. And every time another spike arrives, it decreases the probability of release  
 441 relative to the first spike multiplicatively, such that each component of Eq (7) becomes

$$r_c(t; \mathcal{J}_S) = \sum_{t_{si} \in \mathcal{J}_S} \left( r_c(t - t_{si}) \prod_{\substack{t_{sj} \in \mathcal{J}_S \\ t_{sj} > t_{si}}} (1 - D_c(t - t_{sj})) \right), \quad (9)$$

442 where  $\mathcal{J}_S = \{t_{s1}, t_{s2}, \dots\}$  is now the set of all spike times.

443 Because this formulation now uses spike times rather than delayed  $\text{Ca}^{2+}$  arrival times, the step functions  
 444  $u(t - t_{\text{Caj}})$  of Eq (6) and (7) have been smeared out in time by the temporal delay filter of Eq (4) to become  
 445  $D_c(t - t_{sj})$ . Assuming the latest spike arrives at  $t=0$ ,  $D_c(t)$  is simply the cumulative distribution of the  
 446 temporal delay filter:

$$\begin{aligned} D_c(t) &= \int_{-\infty}^t a(t; k_c, \mu_c, \sigma_c) dt \\ &= \Phi\left(\frac{t - \mu_c}{\sigma_c}\right) - e^{-k_c\left(t - \left(\mu_c + \frac{\sigma_c^2}{2}k_c\right)\right)} \Phi\left(\frac{t - (\mu_c + \sigma_c^2 k_c)}{\sigma_c}\right). \end{aligned} \quad (10)$$

447 More intuitively, by letting  $\sigma_c \rightarrow 0$ , the Gaussian component becomes a delta function, and the first-  
 448 release distribution function above becomes much more simply

$$D_c(t) = (1 - e^{-k_c(t - \mu_c)})u(t - \mu_c). \quad (11)$$

449 Thus, after the second spike, the histogram of releases from the first spike drops off exponentially, while  
450 those due to the second spike rise and fall as for the first spike. When  $\sigma_c$  is small relative to the median  
451 interspike interval, third spikes have an almost imperceptible effect at cutting the first profile short  
452 relative to the second spike's effect. Fig 8 G-I shows how this transition works in response to the same  
453 spike trains as in Fig 8 D-F.

## 454 **Characterizing Facilitation in Vesicle Release Rates**

455 The discussion above has focused on the release response of a single vesicle with a constant probability  
456 of release across spikes. However, many synapses display a facilitation in release probability from one  
457 spike to another [20, 60, 69-73]. This results both from an accumulation of  $\text{Ca}^{2+}$  in the presynaptic space  
458 [69] and from a stochastic accumulation of  $\text{Ca}^{2+}$  on the sensor (Syt) of the SNARE complex. Simulations  
459 with the MCell model demonstrate how nonlinear binding cooperativity in the  $\text{Ca}^{2+}$  sensors induces  
460 facilitation in excess of what would be expected from cytoplasmic  $\text{Ca}^{2+}$  buildup alone (S9 Fig). This  
461 happens because on some trials,  $\text{Ca}^{2+}$  accumulates on the sensor, not enough to trigger vesicle fusion on  
462 the first spike, but enough to increase the probability of reaching the releasable state after subsequent  
463 spikes. As can be seen in S8 Fig,  $\text{Ca}^{2+}$  entry from one AP can predispose the distribution of bound states  
464 of the sensor to trigger release with greater alacrity on subsequent spikes.

465 Furthermore, the level of facilitation depends to some extent on the full history of spiking activity in the  
466 synapse. In the simplest case, the probability of release on one spike should depend only on the  
467 probability for the previous spike and on the time since the previous spike. However, the level of  
468 facilitation is not a simple function of the most recent activity but depends on the rate of stimulation  
469 prior to the last spike. To explore the space of facilitation dynamics more fully, we applied spike trains  
470 with spike ramps of different rates and durations, to see how quickly facilitation builds up, followed by

471 single probe spikes at increasing interspike intervals (ISI), to see how quickly it decays back to baseline  
472 (see Methods). Fig 9 shows examples of how these different spike trains affect the rates of synchronous  
473 and asynchronous release.

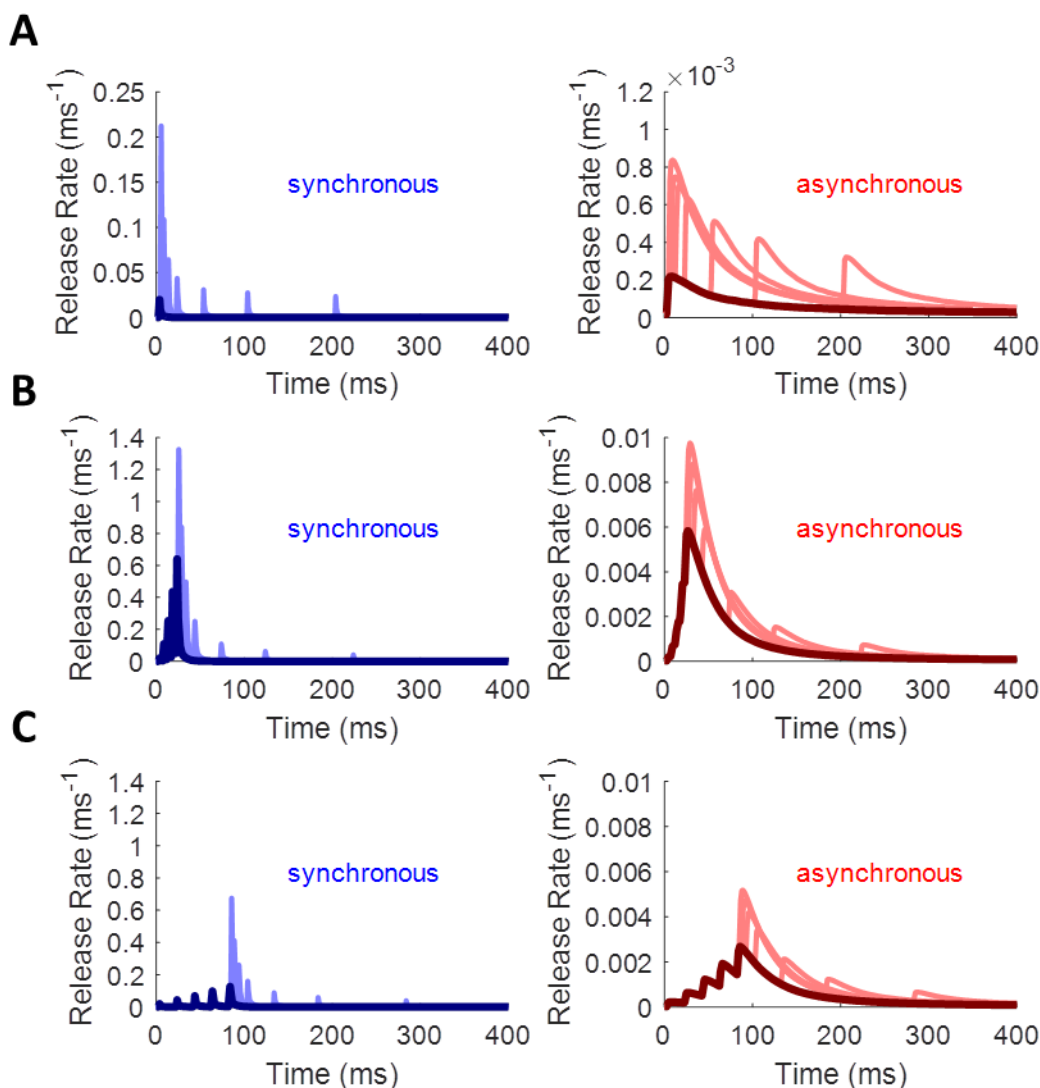

474  
475 **Fig 9. Empirical Facilitation in Synchronous and Asynchronous Release Rates.**  
476 Synchronous release rate shown in blue; asynchronous shown in red. Dark colors represent initial spike  
477 ramp (common to all traces on a plot); light colors represent single probe spikes from different  
478 simulations. Associated  $\text{Ca}^{2+}$  traces omitted for clarity. A: PPF decays with increasing ISI (probe ISIs of 2,  
479 5, 10, 20, 50, 100, 200 ms). B: 5-spike ramp with a 5-ms ISI shows strong facilitation. C: 5-spike ramp  
480 with a 20-ms ISI shows weaker facilitation. Note the change in scale from A to B and C.  
481

482 Facilitation does not affect all components of release equally. Therefore, we derived a general  
483 facilitation function  $F_c(\cdot)$  that affects each release component  $c$  independently. The area under the  
484 curve of each component of the release rate profile (see Eq (1) and (3)) depends on the facilitation  
485 factor according to

$$P_c(n) = P_{c0} \cdot F_c(n), \quad (12)$$

486 where  $P_{c0}$  is the baseline value and  $n$  is the index of the current spike. To ensure that the function works  
487 for arbitrary spike trains, the factor  $F_c(n)$  needs both to grow somehow from spike to spike and to  
488 decay back toward one for large ISIs. This growth can happen in a highly nonlinear fashion, so to account  
489 for this, we take  $F_c(n)$  to be a nonlinear combination of linear facilitation factors  $f_{ci}(n)$  such that

$$F_c(n) = \prod_{i=1}^{M_c} f_{ci}(n)^{\xi_{ci}}, \quad (13)$$

490 where  $M_c$  represents the number of facilitation components (either one or two for all functions  
491 explored below), and  $\xi_{ci}$  represents the nonlinearity applied to facilitation component  $i$  of release  
492 component  $c$ . Each  $f_{ci}(n)$  accounts for some aspect of the internal state of the SNARE complex, in terms  
493 of how the expected number of  $\text{Ca}^{2+}$  ions bound changes with time, that helps determine the probability  
494 of release on subsequent spikes.

495 In the simplest case, each  $f_{ci}(n)$  would decay exponentially from its previous value  $f_{ci}(n - 1)$  before  
496 incrementing by one:

$$f_{ci}(n) = f_{ci}(n - 1)e^{-\Delta t/\tau_{ci}} + 1, \quad (14)$$

497 where  $\Delta t$  is the delay from the previous spike to the current one. The increment of one is meant to  
498 account for the influx of about the same amount of  $\text{Ca}^{2+}$  during each action potential. This formulation  
499 ensures that even after infinitely long intervals, the facilitation factor will equal a value no less than

500  $F_c(0) = 1$ , allowing the release components to return to their baseline values of  $P_c = P_{c0}$  during long  
 501 periods of inactivity, as expected.

502 However, this formula implies that for an infinitely fast rate of stimulation,  $f_{ci}(n)$  could grow toward  
 503 infinity, producing an infinitely fast rate of release, all of which are impossible. More realistically, there  
 504 should exist some finite saturation level,  $L_{ci}$ , such that the facilitation function could never theoretically  
 505 exceed

$$F_c(\infty) = \prod_{i=1}^{M_c} L_{ci}. \quad (15)$$

506 The value of this upper limit is constrained by the rates of vesicle fusion from the fully bound states of  
 507 the SNARE complex ( $\gamma_S$  and  $\gamma_A$  in Table 1) and by the maximum level of  $\text{Ca}^{2+}$  buildup in the presynaptic  
 508 space. When facilitation is still well below this level, it should continue to increment by approximately  
 509 one on every spike, but this increment should fall to zero quickly enough that facilitation never exceeds  
 510 saturation. Setting a maximum number of equal-sized steps to saturation for each component,

511  $N_{ci} = L_{ci}^{1/\xi_{ci}}$ , the value of  $f_{ci}(n)$  becomes

$$f_{ci}(n) = f_{ci}(n-1)e^{-\Delta t/\tau_{ci}} + 1 - \left( \frac{f_{ci}(n-1)e^{-\Delta t/\tau_{ci}}}{N_{ci}} \right)^{N_{ci}}. \quad (16)$$

512 The new term subtracted off at the end ensures that  $f_{ci}(n)$  never exceeds  $N_{ci}$ , just as  $\text{Ca}^{2+}$  cannot  
 513 accumulate to infinite concentrations but is limited by the electrochemical gradient across the cell  
 514 membrane [74]. An alternative would be simply to set  $f_{ci}(n) = N_{ci}$  whenever a step size of one would  
 515 cause it to exceed this limit, but the formula in Eq (16) allows for a smoother approach.

516 With the model for facilitation established, we sought to fit it to the empirical changes observed in  
 517 release rate for complex spike trains. For simplicity, we took facilitation to apply only to the  $P_c$   
 518 parameters, which control for the magnitude of each release component, although in principle the

519 parameters of the temporal filter ( $k_c$ ,  $\mu_c$ , and  $\sigma_c$ ) might also increase ( $\xi_{ci} > 0$ ) or decrease ( $\xi_{ci} < 0$ )  
520 with spike history. As discussed in Methods, we explored 136 unique spike trains for how both spike rate  
521 (along the spike ramp) and ISI (of the probe spike) affect the release rate in response to the last spike.

522 For the fitting algorithm, we used a simplex method for gradient descent, since the derivatives of the  
523 error function are difficult to compute (see Methods). The values of the  $P_c$  parameters were allowed to  
524 vary within bounds, while the profile time constants and the temporal filter parameters were held  
525 constant. The best-fit set of values for  $P_c$  were found for the spike-response profile at the end of each  
526 spike train, after which the meta-parameters of the facilitation functions could be fitted to the patterns  
527 in  $P_c$ . Fig 10 A shows some examples of fitted release rate functions fit to baseline (blue) and facilitated  
528 (yellow) profiles. Fig 10 B depicts how release magnitudes varied for the release magnitude components  
529 (first ( $P_{S1}$ ) and third ( $P_{S3}$ ) components of synchronous release and first component ( $P_{A1}$ ) of  
530 asynchronous release) across all 136 facilitation spike trains (see S10 Fig for a depiction of how stimulus  
531 cases are ordered).



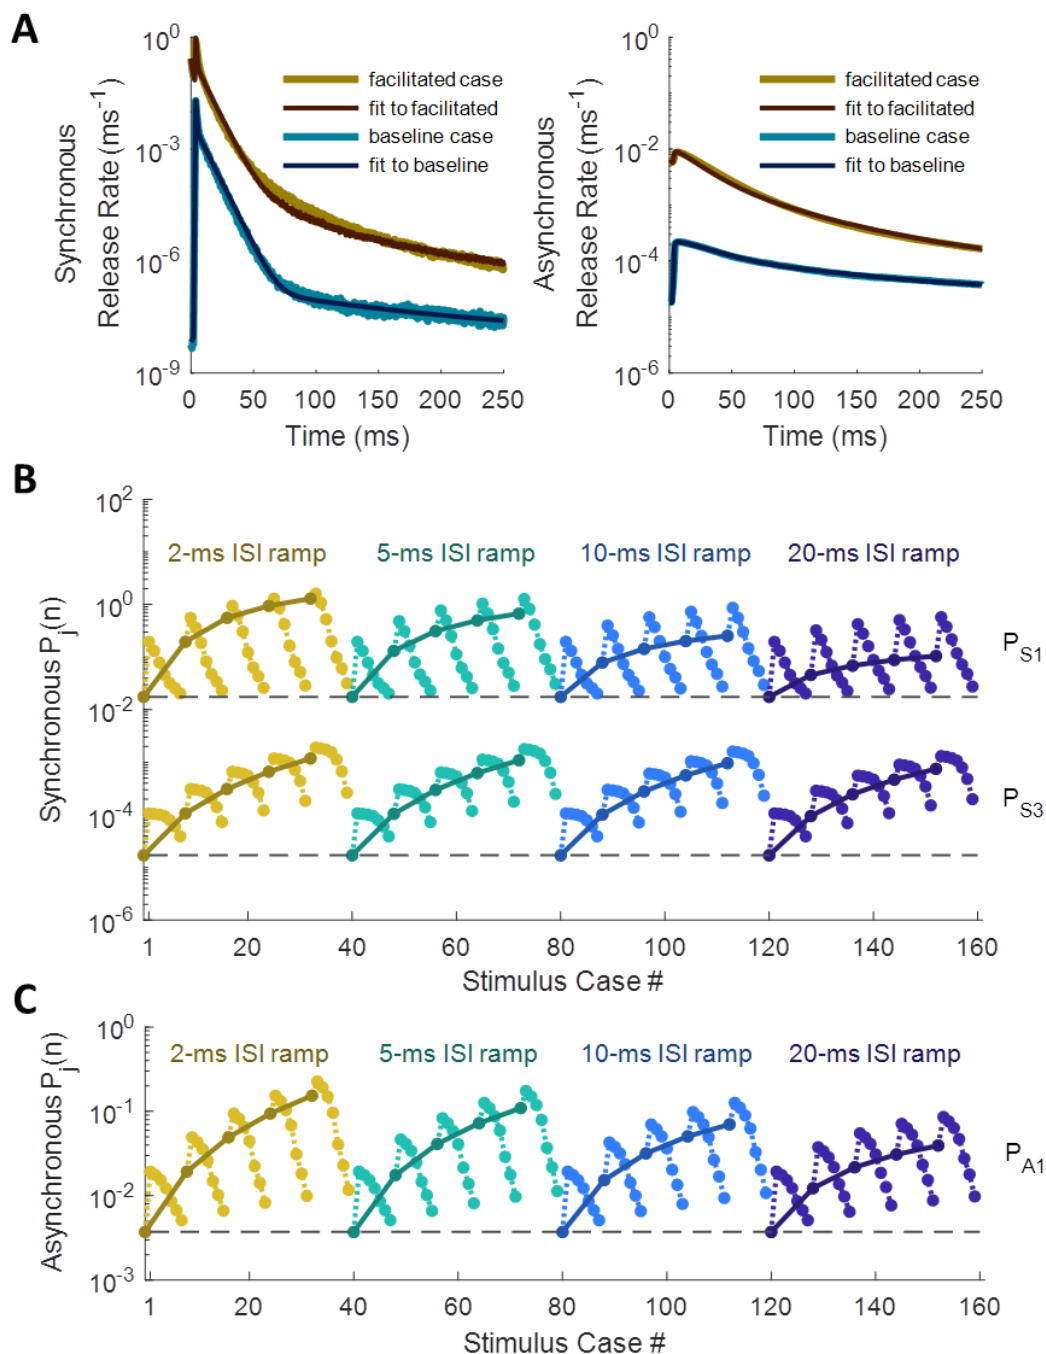

532  
 533 **Fig 10. Release Rate Parameters and Facilitation Metaparameters Fitted to Empirical**  
 534 **Histogram Profiles.**

535 A: Synchronous and asynchronous profiles fitted for baseline (un-facilitated) case, and for highly  
 536 facilitated case (probe spike 5 ms after 5-spike ramp of 5-ms ISIs). B, C: Release fidelity values fitted  
 537 case-by-case (dark colors) overlaid with predictions from best-fit facilitation functions (light colors) for  
 538 synchronous (B) and asynchronous (C) components.

539

540 Through trial-and-error, we found that the two components of synchronous release with the fastest  
541 time constants, along with the fastest component of asynchronous release, each required two  
542 facilitation components to explain their patterns of change from case to case. The synchronous and  
543 asynchronous release components with “medium” time constants (each close to 80 ms) could each be  
544 fitted with a single facilitation component. The slowest release components, with time constants of  
545 1000 ms due to latent  $[Ca^{2+}]_i$  released from the buffer (see Fig 5 C), were constrained not to facilitate,  
546 since changes in these components seemed to have a negligible effect on fitting error. Table 3 records  
547 the facilitation meta-parameters obtained from the fits, along with the baseline values for release  
548 fidelity for each component ( $P_0$ ). During each step of the fitting algorithm, these metaparameters were  
549 used to generate predictions for the state of facilitation across all 136 spike-train cases, and error was  
550 calculated as the fraction of the variance of the “true” release fidelity values unexplained by the  
551 predicted pattern (S12 Fig; see Methods).

552

553 **Table 3. Metaparameters for Facilitation of Release Fidelity.**

554 First column shows baseline magnitudes of integrated release rate, duplicated from Table 2. First and  
 555 second components of synchronous release and first component of asynchronous release facilitate with  
 556 two time constants each. Smallest component of both release mechanisms does not facilitate.  $P_0$  is  
 557 integrated release rate for the un-facilitated case (baseline),  $\tau$  is the time constant of decay for each  
 558 facilitation component,  $N$  is the number of linear facilitation steps to saturation,  $\xi$  is the nonlinearity  
 559 parameter, and  $L$  is the maximum facilitation factor contributed by each component. Valid for  $Ca^{2+}$ -  
 560 sensitive synchronous and asynchronous release mechanisms located 400 nm from a cluster of 100  
 561 VDCCs.

| component | $P_0$                 | $\tau$  | $N$  | $\xi$ | $L = N^\xi$ |
|-----------|-----------------------|---------|------|-------|-------------|
| $S_{11}$  | 0.0175                | 95.9 ms | 7.00 | 1.27  | 11.8        |
| $S_{12}$  |                       | 7.66 ms | 2.32 | 2.93  | 11.8        |
| $S_{21}$  | 0.0220                | 13.1 ms | 10.0 | 1.23  | 17.0        |
| $S_{22}$  |                       | 114 ms  | 17.6 | 1.68  | 125         |
| $S_3$     | $1.70 \times 10^{-5}$ | 199 ms  | 12.5 | 2.67  | 846         |
| $S_4$     | $1.10 \times 10^{-5}$ | –       | 1    | 0     | 1           |
| $A_{11}$  | $3.72 \times 10^{-3}$ | 141 ms  | 12.2 | 1.48  | 40.0        |
| $A_{12}$  |                       | 17.2 ms | 12.5 | 0.996 | 12.4        |
| $A_2$     | 0.0111                | 126 ms  | 12.1 | 1.67  | 64.4        |
| $A_3$     | 0.0136                | –       | 1    | 0     | 1           |

562

563 **Discussion**

564 **Advantages and Limiting Assumptions of Treating MCell as Ground Truth**

565 Basing the new model on MCell has distinct advantages over biological experiments in terms of both  
 566 flexibility and precision when it comes to model validation. As an example, estimates of  $[Ca^{2+}]_i$  in  
 567 neurons obtained from fluorescent reporters in physiological experiments may provide accurate

568 estimates of slow (tens of milliseconds)  $\text{Ca}^{2+}$  transients [75, 76], but the buffering kinetics of the calcium  
569 reporters can act as a low-pass filter, obscuring the faster (0-5 milliseconds) components of  $\text{Ca}^{2+}$   
570 dynamics [37]. Molecular simulations like MCell, on the other hand, can capture these fast transients,  
571 since they track every particle, which may be crucial for correctly modeling fast,  $\text{Ca}^{2+}$ -dependent  
572 synaptic processes like synchronous vesicular release of neurotransmitter [65] (see Figure 6 from [37]).

573 Furthermore, neurotransmitter release may occur asynchronously with respect to the arrival time of  
574 action potentials, following some time-dependent distribution [65]. Experimental methods for  
575 determining release rate would offer far less control of presynaptic conditions over the number of trials  
576 that would be required to tease out the same resolution of detail as is possible with controlled  
577 simulations. Therefore, we chose to constrain ourselves to validating the model developed in this paper  
578 against an MCell model, which has itself been validated already against hippocampal Schaffer collateral  
579 synapses [35].

580 However, this approach is limited on several levels. First, it assumes that MCell can correctly replicate  
581 the dynamics of diffusion and molecular interactions of biophysical systems through its Markov chain  
582 Monte Carlo framework [33, 34, 36]. Second, it assumes that the molecular kinetics of the included  
583 species match their true kinetics. Finally, it assumes that the molecular species and biological systems  
584 modelled are the only ones present in the presynaptic compartment, or at least that any other systems  
585 would produce only negligible changes to the phenomenology of the synapse. MCell has been  
586 sufficiently well validated to satisfy the first assumption [36], at least for the temporal and spatial scales  
587 of interest here (hundreds of microseconds and several microns).

588 The second assumption is valid insofar as the molecular models used by MCell correctly represent  
589 reality, both in terms of the molecular state diagrams and in terms of the binding and interaction

590 kinetics reported by other groups: Sun et al. [53] for the descriptions of  $\text{Ca}^{2+}$ -driven SNARE kinetics for  
591 vesicular release; Bischofberger et al. [68] for the VDCC dynamics for spike-evoked  $\text{Ca}^{2+}$  influx; Nägerl et  
592 al. [77] for the high- and medium-affinity sites of the calbindin  $\text{Ca}^{2+}$  buffer; and Sneyd et al. [78] for the  
593 kinetics of the PMCA pumps. The state diagrams and kinetic parameters for these species are  
594 summarized in S1 Fig and S1 Table. Simplifying assumptions inevitably go into models such as these,  
595 which limit the accuracy of any model based on them. However, for the purposes of this paper, we  
596 assume that these models reproduce experimental results sufficiently well to use them.

597 The greatest limitations to model accuracy come from the third assumption in that the true variety of  
598 systems and molecular species in biological synapses far exceeds what MCell represents [79]. For  
599 instance, the Nadkarni et al. [35] model did not include any endoplasmic reticulum (ER), which stores  
600 intracellular  $\text{Ca}^{2+}$  and has a significant effect on neuronal signaling [80]. Ryanodine receptors (RyR) [81-  
601 83] and inositol 1,4,5-trisphosphate receptors (IP3R) [84, 85] can unleash these  $\text{Ca}^{2+}$  stores. Inclusion of  
602 such an ER would likely alter the shape of the  $\text{Ca}^{2+}$  transient and increase the probability of  
603 neurotransmitter release, possibly over longer time scales, as in synaptic augmentation [67, 86].

604 Another system that would significantly affect  $\text{Ca}^{2+}$  dynamics over multiple spikes is the inactivation and  
605 facilitation of  $\text{Ca}^{2+}$  channels mediated by  $\text{Ca}^{2+}$ -calmodulin (CaM) and  $\text{Ca}^{2+}$  binding proteins (CaBP1) [62,  
606 87-90]. These interactions might help control release-independent depression (RID) and the frequency-  
607 dependent recovery (FDR) from depression [91] by restricting  $\text{Ca}^{2+}$  influx over extended spike trains.

608 Furthermore, the presynaptic  $\text{Ca}^{2+}$  buffer includes more than just calbindin [92, 93] and diffusion is  
609 limited by the plethora of intracellular microstructures [94, 95]. Because location and movement  
610 through space plays a crucial role in phenomenology (see Fig 2, S4 Fig, S6 Fig, and S7 Fig), investigating  
611 how these features affect release dynamics would require rerunning the MCell model with them  
612 included.

613 The advantages of using MCell as ground truth, we believe, outweigh the limitations enumerated above.  
614 A simulated synaptic model allows for much finer experimental control and consistency from trial to  
615 trial, while yielding far more precise results than physiological experiments. Measuring release rate,  
616 probability, facilitation, and depression at biological synapses is difficult and requires a number of  
617 problematic assumptions [96]. Using MCell allows for precise measurements of unmodified  $\text{Ca}^{2+}$  traces  
618 [37] and of single-vesicle release rates, even controlling for such confounding processes as the post-  
619 release refractory period [35]. Any new features, including arbitrary numbers of vesicle pools and  
620 synaptic processes, can easily be included in future work.

## 621 **Comparison to Other Models of Short-Term Synaptic Dynamics**

622 In response to a given spike train, this model produces a release rate profile that represents the rate of a  
623 time-varying Poisson process, the average release activity of an infinite number of synapses (or trials)  
624 responding to the same spike train. The multi-exponential form of the release rate profile and the  
625 facilitation factors that modify it evolve deterministically for a given sequence of spike times.  
626 Incorporating this as a deterministic synaptic model into a spiking neural network simulation would  
627 allow for comparison with other deterministic models of short-term plasticity, such as that introduced  
628 by Tsodyks and Markram [97]. Their model uses a relatively simple representation of the utilization of  
629 synaptic resources, tracking the fraction of resources in recovered, active, and inactivated states, to  
630 flexibly model both short-term depression and facilitation [20], and has proven useful in simulated  
631 neural network contexts for producing complex behavior [98]. On the other hand, the predictive power  
632 of the Tsodyks-Markram model is limited by how it abstracts away all the internal processes of the  
633 synapse, conflating presynaptic (vesicle availability, release probability) with postsynaptic  
634 (neurotransmitter receptor saturation and desensitization) resources. In contrast, our model more  
635 closely tracks the vesicle release phenomenology that results directly from  $\text{Ca}^{2+}$ -evoked molecular

636 dynamics. This allows us to explore the contribution of more fine-grained synaptic features to whole-  
637 network computations.

638 Another limitation of the Tsodyks-Markram model is its deterministic formulation, representing average  
639 or aggregate synaptic behavior rather than single-trial or single-synapse behavior. However, the  
640 presence of trial-to-trial stochasticity in synaptic transmission may have important implications for the  
641 learning and information processing performed in neural circuits [27, 99-103]. Our model can capture  
642 such trial-to-trial and synapse-to-synapse variability if we sample release events from the time-varying  
643 Poisson process defined by the release rate profile.

644 An example of a presynaptic model that captures probabilistic release is that by Maass and Zador [104].  
645 The Maass-Zador model tracks short-term facilitation in response to spike history and short-term  
646 depression in response to release history, calculating the probability of release at each spike time and  
647 generating Boolean release events according to this probability. However, these release events only  
648 occur exactly at spike times, in contrast to the spontaneous and asynchronous release that occurs in real  
649 synapses [105, 106]. Furthermore, the phenomenology of the Maass-Zador model, while elegant, arises  
650 from mathematical abstractions rather than from physiologically grounded mechanisms, making it  
651 susceptible to producing unrealistic behavior and limiting its utility as a testable model.

652 Kandaswamy et al. [67] present another presynaptic model that aims for more physiologically grounded  
653 realism, employing multiple mechanisms of vesicle recycling, facilitation, augmentation, and release-  
654 dependent depression, each with its own set of parameters. Some parameters were constrained to  
655 values derived from earlier studies, while other parameters were fit to experimental measurements of  
656 changes in synaptic strength in response to various constant-frequency spike train stimuli. Although the  
657 resulting model does qualitatively well at matching the experimental data, it lacks generalizability. In

658 particular, the free parameters of their model, which they adjusted to fit the experimental data, depend  
659 empirically on the frequency of stimulation but without any discernible pattern that would provide  
660 insight into their physiologic origin (see Table 2 in [67]). Furthermore, the model for facilitation treats  
661 the first spike as a special case relative to all subsequent spikes, excluding the first spike from facilitation  
662 to fit the data. A realistic short-term facilitation model should scale the probability of release on the first  
663 spike as though it occurred in the middle of a train after an infinite ISI, since the synapse should return  
664 to its baseline state after a sufficiently long interval of no spiking activity, which our model  
665 accomplishes.

666 Future work with our model will involve implementing it in an event-driven framework, where release  
667 events are sampled from the time-varying Poisson process defined by the release rate profile. This  
668 approach will provide a powerful way to include a highly generalizable facilitation function and sub-  
669 millisecond vesicular release phenomenology, grounded in molecular kinetics, into a highly scalable and  
670 computationally efficient presynaptic model. In contrast to the models reviewed above, this model can  
671 achieve both the stochasticity and the asynchronicity that are characteristic of real synapses, while  
672 maintaining a clear mapping between its parameters and the underlying molecular mechanisms. This  
673 approach will be crucial for exploring the impact of different presynaptic mechanisms on the  
674 computational performance of large neural circuits.

675 The main advantage of our model is its balance of computational efficiency with physiologically  
676 grounded realism. It accounts for both asynchronous and spontaneous release events, which the Maass-  
677 Zador model lacks. For neural network simulations where the presence of stochasticity in synaptic  
678 transmission is more important than reproducing true dynamics, the Maass-Zador model may suffice.  
679 However, for investigations into how presynaptic mechanisms of vesicle release affect information  
680 transmission and network behavior, our model provides an indispensable layer of flexibility.



681 Furthermore, our model provides a highly flexible and explanatory framework. Each of the parameters  
682 for describing the profile of the release histogram ( $P$ ,  $\tau$ ,  $k$ ,  $\mu$ ,  $\sigma$ ; see Eq (1), (3), (4)) has an almost direct  
683 link to the underlying physiology, whether to the  $\text{Ca}^{2+}$ -binding and vesicle fusion kinetics of the SNARE  
684 complex ( $P$  and  $\tau$ ) or to the stochastic delay in response to the spike caused by buffered diffusion of  $\text{Ca}^{2+}$   
685 ( $k$ ,  $\mu$ , and  $\sigma$ ). Furthermore, the facilitation function has sufficient complexity to account for the changes  
686 seen in neurotransmitter release fidelity of a wide variety of spike train patterns. Importantly, all spikes  
687 are treated equally: Eq (13) and (16) apply as consistently to the first spike as to the  $n$ -th. While it falls  
688 short in terms of computational efficiency relative to the Kandaswamy et al. model, it makes up for it in  
689 terms of biophysical plausibility and its utility for testing hypotheses regarding synaptic function.

## 690 **Importance of Facilitation Function Parameterization**

691 Different synapse types in different regions of the brain employ different short-term plasticity functions,  
692 including various forms of facilitation and depression, transforming spike timing codes into  
693 neurotransmitter release timing codes [97]. We do not know what the precise computational roles of  
694 facilitation and depression play in neural circuits, but it seems likely to involve more than just high-pass  
695 or low-pass filtering of spike trains [19, 26, 27, 107-109]. The model of facilitation presented in this  
696 paper enables the exploration of this question both because of its grounding in explainable molecular  
697 physiology via MCell and because of its amenability to efficient simulation of complex neural circuits.

698 One possible shortcoming of the facilitation function presented in this paper is that we did not explore  
699 the steady-state behavior in our simulations. Although the steady-state facilitation factors can be  
700 calculated from the fitted parameters, we will need to run MCell simulations with longer spike ramps to  
701 confirm their values for long spike trains of different frequencies. Since the release rates explored in this  
702 paper deal with single-vesicle release probabilities, release-dependent depression (i.e. depletion-

703 dependent depression) should occur naturally when applying the model to simulations of synapses with  
704 finite readily releasable vesicle pools. However, other forms of release-independent depression may be  
705 more relevant to natural spike frequencies [91, 110] and could be incorporated into an extra facilitation  
706 factor within the current model by using a negative  $\xi$  as the exponent in Eq (13). Thus, the facilitation  
707 function can be naturally extended to include release-independent depression mechanisms, although  
708 further research is necessary to confirm the kinetics of the other active zone molecules of non-  
709 hippocampal synapses that underlie such mechanisms.

## 710 **Future Refinements**

711 Because so much about release probability and timing depends on the precise magnitude and time  
712 course of the  $\text{Ca}^{2+}$  transient, accurate modelling of  $\text{Ca}^{2+}$  dynamics using MCell is essential to future  
713 refinements of our model. For instance, intracellular calcium stores, including ER and its associated  
714 receptors and channels [80-86, 111] and mitochondria and its associated calcium uniporter [112], can  
715 impact the  $\text{Ca}^{2+}$  signaling over the long term. The diffusion of  $\text{Ca}^{2+}$  through the presynaptic space can be  
716 affected in ways not captured by our current model by buffering molecules other than calbindin and  
717 signaling molecules such as CaM and CaBP1 [62, 87-90, 92, 93] and by the geometry of cytoskeletal  
718 microstructures [94, 95]. Additional mechanisms that can influence the  $\text{Ca}^{2+}$  transient include the shape  
719 of the presynaptic action potential, which can vary in cases such as Fragile X syndrome [113], spatially  
720 localized  $\text{Ca}^{2+}$  spikes mediated by presynaptic NMDA receptors [114-116], and retrograde signaling via  
721 endocannabinoid receptors [117-119].

722 Other considerations of synaptic physiology, those which do not affect the shape of the spike-evoked  
723  $\text{Ca}^{2+}$  transient, can be characterized without running full MCell simulations. These include the structure  
724 and dynamics of the SNARE complex. In our model, we assumed that each vesicle employs two  $\text{Ca}^{2+}$

725 sensors for triggering vesicle fusion, Syt-1/2 for synchronous release and Syt-7 for asynchronous release,  
726 as characterized by the Sun et al. [53] model. Each mechanism acted independently, and together they  
727 served as the sole mechanism of release. However, many more molecules comprise the SNARE complex,  
728 each affecting release fidelity in complex ways [14, 15, 44, 48-52]. In fact, the inclusion of extra  
729 molecules in the SNARE assembly may play a crucial “superpriming” step in enhancing the release  
730 alacrity of already-primed vesicles [44, 69]. Furthermore, although a single SNARE complex is sufficient  
731 to induce spike-evoked release [120], each vesicle may have multiple SNARE complexes associated with  
732 it, which is necessary for fast vesicle fusion [121]. We predict that multiplying SNARE complexes would  
733 simply multiply release rate in proportion. It is less clear what effects that other molecules, such as  
734 complexins and Muncs, would have on release kinetics. A quantitative understanding of their molecular  
735 interaction kinetics is required before they can be applied to this model. Once obtained, however, we  
736 can apply deterministic simulations of state probabilities (see Methods) for this more complex SNARE  
737 model, similar to what we did in this paper. If these simulations are driven by the improved  $\text{Ca}^{2+}$   
738 transients obtained from the more mechanistically exhaustive MCell simulations described above, we  
739 can derive much more biologically accurate phenomenology.

740 Although our work focused on characterizing hippocampal Schaffer collateral synapses, our approach  
741 can apply just as well to other synapse types. Additionally, other internal synaptic processes such as  
742 vesicle recycling may be combined with our model within an event-driven framework. In this way, future  
743 refinements of our model will have the ability to capture physiologically realistic phenomenology, trial-  
744 to-trial variability, asynchronicity, and internal synaptic dynamics for a wide variety of synapses at very  
745 low computational cost. It can help to uncover the contributions of single synapses or synaptic features  
746 to network computations, establishing a connection from molecular kinetics through synaptic  
747 phenomenology up to whole-network dynamics. This can be applied to create predictive models of

748 biological networks from known physiological parameters or to design neuromorphic chips or spiking  
749 neural networks with dynamical properties relevant to future developments in brain-computer  
750 interfaces and artificial intelligence.

## 751 Methods

### 752 **Ca<sup>2+</sup>-Evoked Vesicle Release Model**

753 The detailed model of molecular reaction-diffusion dynamics was developed in the modeling  
754 environment known as MCell [33, 34, 36]. The MCell model used as a basis for the design and validation  
755 of the presynaptic model presented in this paper comes from Nadkarni et al. [35]. It includes  
756 mechanisms for voltage-sensitive Ca<sup>2+</sup> influx and for Ca<sup>2+</sup> buffering in the presynaptic space, with pumps  
757 and channels in the membranes to maintain a steady-state average free Ca<sup>2+</sup> concentration of 100 nM  
758 [74].

759 When an action potential arrives at the presynaptic membrane, voltage-dependent Ca<sup>2+</sup> channels  
760 (VDCCs) open stochastically, traversing through four unopened states via voltage-dependent state  
761 transition rates [68] (see S1 Fig A), producing a Ca<sup>2+</sup> influx due to the steep electrochemical gradient  
762 [74]. The VDCCs very quickly shut off after the membrane potential returns to baseline (S2 Fig), and the  
763 newly introduced Ca<sup>2+</sup> ions diffuse randomly in the presynaptic space. Vesicle fusion occurs when a  
764 sufficient number of Ca<sup>2+</sup> ions have diffused over and bound to the release machinery associated with  
765 the SNARE complex of a docked vesicle [15, 35, 53]. Cytoplasmic calbindin (CB) with a concentration of  
766 45 μM acts as a buffer that modulates the magnitude and duration of the free Ca<sup>2+</sup> (S1 Fig B) [77], and  
767 plasma membrane Ca<sup>2+</sup>-ATPase (PMCA) pumps (S1 Fig C) actively remove Ca<sup>2+</sup> ions over a time course of

768 seconds [78] to the baseline  $[Ca^{2+}]_i$  of 100 nM [35, 74]. Parameter values for these molecular  
769 mechanisms are given in S1 Table.

770 Calcium concentration as a function of time is measured at various spatial locations within the  
771 presynaptic space (see Fig 2 for synaptic structure and “Estimating  $[Ca^{2+}]_i$  from Collision Events” in the  
772 Supplemental Information for a description of how local  $[Ca^{2+}]_i$  is measured). For each spike train, local  
773  $[Ca^{2+}]_i$  in the vicinity of the SNARE complex was averaged over 2000 trials at a resolution of 0.1 msec.  
774 These calcium transient profiles were then used to drive deterministic simulations of SNARE state  
775 probabilities, as described below.

## 776 **Deterministic Simulations of State Probabilities**

777 With the  $Ca^{2+}$  profiles obtained for each spike-evoked simulation in MCell and with the state transitions  
778 for the release mechanisms defined in Fig 3 A-B and Table 1, the corresponding vesicle release-rate  
779 profiles become computable. While the MCell simulations we ran do generate their own sets of release  
780 times, it would be impossible to fit precise phenomenological functions to the release histograms  
781 without running an infeasibly large number of trials. Furthermore, vesicle depletion following release  
782 events confounds the representation of release rate, its functional form, and its facilitation dynamics  
783 (see Fig 4). Therefore, instead of running millions of trials of MCell (or more) to produce temporally  
784 precise single-vesicle release rate histograms, we used the averaged calcium profiles from 2000 trials (at  
785 a resolution of 0.1 msec) to drive a deterministic simulation of the SNARE complex, tracking the  
786 probabilities of being in each state as functions of time. This approach, in effect, produced the average  
787 release histograms equivalent to an infinite number of trials acting on the averaged calcium traces.

788 This method tracked the probabilities of a particular release mechanism being in each possible state at  
789 every time step. That is, each state represents the number of  $Ca^{2+}$  ions bound to the release molecule (0

790 through 5 for Syt-1 (synchronous; S) and 0 through 2 for Syt-7 (asynchronous; A). Each mechanism  
 791  $X \in \{S, A\}$  has a state probability vector  $\mathbf{s}^X(t)$  associated with it that tracks the probability of being in  
 792 each possible state, that is, the probability of having  $n$   $\text{Ca}^{2+}$  ions currently bound for  $n \in \{0 \dots N_X\}$ ,  
 793 where  $N_S = 5$  and  $N_A = 2$ . State probabilities add to unity, and they update on each time step  
 794 according to a  $[\text{Ca}^{2+}]$ -dependent state transition rate matrix  $\mathbf{T}^X$ , whose superdiagonal terms are the  
 795 unbinding rates, moving from a higher to a lower-bound state, and whose subdiagonal terms are the  
 796 binding rates, moving from a lower to a higher-bound state. Specifically, for mechanism  $X \in \{S, A\}$  with  
 797  $N_X \in \{5, 2\}$  calcium ions needed for release to occur, the binding rate is

$$T_{n+1,n}^X = (N_X - n) \cdot k_{X+} \cdot [\text{Ca}^{2+}], \quad (17)$$

798 and the unbinding rate is

$$T_{n-1,n}^X = n \cdot b^{n-1} \cdot k_{X-} \quad (18)$$

799 for  $n \in \{0 \dots N_X\}$  ions currently bound, where  $b = 0.25$  acts as a binding cooperativity factor (see Fig 3  
 800 and S8 Fig for state transition diagrams and Table 1 for parameter values). Notice that we index the  
 801 rows and columns of  $\mathbf{T}^X$  (as well as the dimensions of  $\mathbf{s}^X$ ) starting from 0 rather than 1 for convenience  
 802 in representing the number of calcium ions bound in the current state (column) and in the next state  
 803 (row). To enforce conservation of mass, the diagonal terms must equal the combined rate of leaving the  
 804 current state through both binding and unbinding:

$$\begin{aligned} T_{n,n}^X &= -(T_{n+1,n}^X + T_{n-1,n}^X) \\ &= -((N_X - n) \cdot k_{X+} \cdot [\text{Ca}^{2+}] + n \cdot b^{n-1} \cdot k_{X-}). \end{aligned} \quad (19)$$

805

806 The above formulation does not yet take into account vesicle fusion. Recall that each mechanism  $X$   
 807 induces vesicle release at a certain rate  $\gamma_X$  from its releasable state (all  $\text{Ca}^{2+}$  ions bound). Therefore, in

808 addition to the unbinding rate, the diagonal term for the fully bound state of each mechanism also  
809 includes the rate of transition to the release state:

$$T_{N_X, N_X}^X = -(\gamma_X + N_X \cdot b^{N_X-1} \cdot k_{X-}), \quad (20)$$

810 where  $\gamma_X$  is the mechanism-specific release rate defined in Table 1. By including the release rate, the  
811 sum of state probabilities would slowly decay towards zero as probability mass leaks into the  
812 (untracked) release state, since when release occurs, the vesicle can no longer participate in further  
813 activity. This depletion of vesicle probability would obscure the true shape of the single-vesicle release  
814 rate. To account for this, the state vector is renormalized at each time step by the probability of no  
815 release event having yet occurred, such that the occupancies of each state again add to one:

$$\mathbf{s}^X(t) \leftarrow \frac{\mathbf{s}^X(t)}{\sum_{n=0}^{N_X} s_n^X(t)}. \quad (21)$$

816 If one considers the deterministic simulation to represent a state histogram averaged over an infinite  
817 number of trials, this normalization step effectively “zooms in” on the fraction of trials at each time step  
818 for which no release occurred. Thus, the model tracks the instantaneous rate of release, given that no  
819 release has yet occurred since the start of the simulation. This permits the calculation, for example, of  
820 the equilibrium state probability distribution (see S8 Fig, left pie charts), driven by the steady-state  $\text{Ca}^{2+}$   
821 concentration (100 nM in MCell: [35]). These equilibrium state vectors are essential for initializing all  
822 other simulations. From these, it is possible to determine the steady-state spontaneous release rates for  
823 each mechanism that result ( $S_0 = 5.70 \times 10^{-9} \text{ms}^{-1}$ ;  $A_0 = 1.84 \times 10^{-5} \text{ms}^{-1}$ ; see S3 Fig).

824 Because the matrix  $\mathbf{T}^X$  represents transition rates rather than transition probabilities, it acts as the  
825 infinitesimal generator for a continuous-time finite state Markov process [122] rather than as a discrete  
826 transition matrix. Converting this exactly to a discrete transition probability matrix  $\mathbf{P}^X$  using a time step  
827 of  $\Delta t$  requires an infinite sum of matrix products, according to the Taylor series

$$\mathbf{P}^X([\text{Ca}^{2+}]; \Delta t) = \exp(\Delta t \cdot \mathbf{T}^X([\text{Ca}^{2+}])) = \sum_{m=0}^{\infty} \frac{(\Delta t \cdot \mathbf{T}^X([\text{Ca}^{2+}]))^m}{m!}. \quad (22)$$

828 This is akin to the probability of a Poisson process with transition rate  $\lambda$  remaining in the same state for  
 829 a time duration  $\Delta t$ , which follows the exponential form  $p(t > \Delta t) = \exp(-\Delta t \cdot \lambda)$ , acting just like the  
 830 diagonal terms of the transition rate matrix and sharing the same Taylor series expansion. The time step  
 831  $\Delta t$  needs to be small enough such that the level of  $[\text{Ca}^{2+}]$  can be regarded as constant (on the order of  
 832 0.1 msec for the calcium transients investigated for this paper). However, in order to avoid too many  
 833 matrix multiplications and sums, we chose a time step of 0.005 msec, which is small enough to use the  
 834 linear approximation to Eq (22) while still maintaining numerical stability, even at very high levels of  
 835  $[\text{Ca}^{2+}]$ :

$$\mathbf{P}^X([\text{Ca}^{2+}]; \Delta t) \approx \mathbf{I} + \Delta t \cdot \mathbf{T}^X([\text{Ca}^{2+}]). \quad (23)$$

836 Thus, the state vector at time  $t + \Delta t$  is the product of the state transition probability matrix with the  
 837 state vector at time  $t$ , according to

$$\begin{aligned} \mathbf{s}^X(t + \Delta t) &= \mathbf{P}^X([\text{Ca}^{2+}](t); \Delta t) \mathbf{s}^X(t) \\ &= \left( \mathbf{I} + \Delta t \cdot \mathbf{T}^X([\text{Ca}^{2+}](t)) \right) \mathbf{s}^X(t), \end{aligned} \quad (24)$$

838 followed by the renormalization described above in Eq (21).

839 Similarly, the transitions in state probabilities for VDCCs, calbindin, and PMCA pumps in the well-mixed  
 840 model were calculated according to

$$\mathbf{s}^M(t + \Delta t) = (\mathbf{I} + \Delta t \cdot \mathbf{T}^M) \mathbf{s}^M(t), \quad (25)$$

841 where  $M \in \{\text{VDCC}, \text{Cb}, \text{PMCA}\}$  refers to the molecular species. Furthermore, the transition rate matrix

842  $\mathbf{T}^{\text{VDCC}}$  is a function of membrane potential, while the matrices  $\mathbf{T}^{\text{Cb}}$  and  $\mathbf{T}^{\text{PMCA}}$  are functions of  $[\text{Ca}^{2+}]_i$

843 (see S1 Fig and S1 Table for state transition diagrams and transition rate parameters). Within the well-



844 mixed model simulations, diffusion occurs instantaneously, effectively eliminating space from  
845 consideration and allowing  $[Ca^{2+}]_i$  to be the same for all molecular mechanisms within the synapse.

## 846 **Stimulus Protocols for Exploring Facilitation**

847 Whereas simulations with single action potentials can elucidate the functional form of synchronous and  
848 asynchronous release, stimulus trains of multiple spikes can reveal the dynamics of facilitation in release  
849 probability, which is well documented experimentally [20, 60, 69-73]. Short-term facilitation in release  
850 probability is more pronounced for spikes closer together in time than for those separated by long  
851 intervals. To investigate how delay affects probability of release, we studied paired-pulse facilitation  
852 (PPF) for interspike intervals (ISIs) of exponentially increasing delay. Specifically, we stimulated the  
853 MCell model with paired pulses of action-potential-like waveforms separated by 2, 5, 10, 20, 50, 100,  
854 and 200 ms and measured the local  $[Ca^{2+}]_i$  at a point within the axon (see Fig 2 for synaptic structure and  
855 “Estimating  $[Ca^{2+}]_i$  from Collision Events” in the Supplemental Information for a description of how local  
856  $[Ca^{2+}]_i$  is measured). These  $Ca^{2+}$  traces then drove deterministic simulations of synchronous and  
857 asynchronous release rate, as described in the previous section. This permitted us to determine a  
858 functional form to describe PPF (see Results).

859 Realistic spike trains, however, involve patterns much more complex than paired pulses, and the recent  
860 history of presynaptic activity can have a strong effect on future changes in release probability. To see  
861 how facilitation evolves in more complex trains of action potentials, we designed a protocol to explore a  
862 larger space of possible facilitated states, assuming that the level of facilitation experienced on one  
863 spike depends exclusively on the delay since the previous spike (the interspike interval, or ISI) and on the  
864 state of some internal facilitation parameter from the previous spike. The spike trains generally consist  
865 of two phases: a spiking ramp and a probe spike. The ramp phase explores how facilitation develops

866 with multiple spikes at fixed ISIs and having anywhere from one to five spikes with an ISI of 2, 5, 10, or  
867 20 ms (time prevented the exploration of ramps with more spikes). The probe phase explores how  
868 facilitation wears off with increasing delay between spikes and consists of a single spike at 2, 5, 10, 20,  
869 50, 100, or 200 ms after the end of the ramp, as in the PPF protocol above. All these combinations of  
870 ramps and probes add up to  $5 \times 4 \times (7 + 1) = 160$  cases (including those cases without a probe spike)  
871 or 136 unique spike trains (discounting the repeats with one spike in the ramp at different ISIs). Future  
872 work can explore the steady-state behavior of the facilitation factors by testing longer spike ramps of  
873 each ISI.

## 874 **Algorithms for Fitting Parameters and Metaparameters**

875 Fitting parameter values to the shapes of the release-rate histograms involved two steps: first, obtaining  
876 an initial guess, and second, optimizing the parameter values to a best-fit set. For the first step, the time  
877 constants for rate decay (see Eq (1), (3), and Table 2) were found from the slopes of the logarithms of  
878 the profiles (see Eq (2), Fig 5, and Fig 6) in response to both  $\text{Ca}^{2+}$  impulse and the  $\text{Ca}^{2+}$  traces derived  
879 from MCell. Other parameters were initialized through trial and error. For the second step, we applied  
880 the Nelder-Mead simplex method of function optimization using the `fminsearch()` function in MATLAB  
881 2016 [123-125] to minimize the cost function over the parameters. This method does not require a  
882 measure of the gradient of the cost function, which was not computable analytically. The cost function  
883 uses the fraction of the variance unexplained (FVU) by the model, as in

$$\text{FVU}(y(t), f(t)) = \frac{\sum_{n=1}^{N_t} (y(t_n) - f(t_n))^2}{\sum_{n=1}^{N_t} (y(t_n) - \bar{y})^2}, \quad (26)$$

884 where  $\bar{y}$  is the mean release rate,  $y(t)$  is the true shape of the release rate profile, and  $f(t)$  is the  
885 model profile at the same  $N_t$  time points. More precisely, the cost function  $\epsilon$  is a linear combination of  
886 the FVU for the function and for the logarithm of the function:

$$\epsilon(y(t), f(t)) = \alpha \cdot \text{FVU}(y(t), f(t)) + \beta \cdot \text{FVU}(\log(y(t)), \log(f(t))), \quad (27)$$

887 where  $\alpha$  and  $\beta$  are constants ( $\alpha = \beta = 1$  in the fits run for this paper). The FVU for the functions in  
888 linear space is more sensitive to the high-amplitude peaks that occur for the fast release components,  
889 while the FVU for the functions in logarithmic space is more sensitive to the slopes (and therefore the  
890 time constants) of the exponential components.

891 The metaparameters of the facilitation functions (see Eq (13), (16), and Table 3) were fitted after the  
892 parameters were fitted to the release profiles in response to each spike of the trains described in the  
893 previous section of Methods. As described in Results, we took facilitation to apply only to the  $P_c$   
894 parameters, allowing them to vary within bounds for each spike in the train, while the profile time  
895 constants and the temporal filter parameters were held constant. The best-fit set of values for  $P_c$  were  
896 found for the final spike-response profile of each spike train. The fitted parameters were taken as true,  
897 and the space of the logarithms of the metaparameters  $\tau$ ,  $N$ , and  $L = N^\xi$  was explored, using the same  
898 error function and optimization as above.

## 899 Acknowledgements

900 We would like to thank Donald Spencer and Margot Wagner for all the perspectives, insights, and  
901 suggestions they offered as we prepared this manuscript for publication. MCell development is  
902 supported by the NIGMS-funded (P41GM103712) National Center for Multiscale Modeling of Biological  
903 Systems (MMBioS). This work was supported by Howard Hughes Medical Institute, by The Swartz  
904 Foundation, and by the National Science Foundation (NSF DBI-1707356 NeuroNex).

905

## 906 References

- 907 1. Abbott, L.F. and W.G. Regehr, *Synaptic computation*. Nature, 2004. **431**(7010): p. 796-803.
- 908 2. Alabi, A.A. and R.W. Tsien, *Synaptic vesicle pools and dynamics*. Cold Spring Harb Perspect Biol, 2012.
- 909 **4**(8): p. a013680.
- 910 3. Gross, O.P. and H. von Gersdorff, *Recycling at synapses*. eLife, 2016. **5**: p. e17692.
- 911 4. Li F, P.F., Perez E, Eng WS, Melia TJ, Rothman JE, Tareste D, *Energetics and dynamics of SNAREpin*
- 912 *folding across lipid bilayers*. Nat Struct Mol Biol, 2007. **14**(10): p. 890-896.
- 913 5. Sutton, R.B., et al., *Crystal structure of a SNARE complex involved in synaptic exocytosis at 2.4 Å*
- 914 *resolution*. Nature, 1998. **395**(6700): p. 347-53.
- 915 6. Pobbati, A.V., A. Stein, and D. Fasshauer, *N- to C-terminal SNARE complex assembly promotes rapid*
- 916 *membrane fusion*. Science, 2006. **313**(5787): p. 673-6.
- 917 7. Li, F., et al., *A half-zipped SNARE complex represents a functional intermediate in membrane fusion*. J
- 918 *Am Chem Soc*, 2014. **136**(9): p. 3456-64.
- 919 8. Ubach, J., et al., *The C2B domain of synaptotagmin I is a Ca<sup>2+</sup>-binding module*. Biochemistry, 2001.
- 920 **40**(20): p. 5854-60.
- 921 9. Ubach, J., et al., *Ca<sup>2+</sup> binding to synaptotagmin: how many Ca<sup>2+</sup> ions bind to the tip of a C2-domain?*
- 922 *EMBO J*, 1998. **17**(14): p. 3921-30.
- 923 10. Fernandez, I., et al., *Three-dimensional structure of the synaptotagmin 1 C2B-domain: synaptotagmin 1*
- 924 *as a phospholipid binding machine*. Neuron, 2001. **32**(6): p. 1057-69.
- 925 11. Zhu, Y. and C.F. Stevens, *Probing synaptic vesicle fusion by altering mechanical properties of the*
- 926 *neuronal surface membrane*. Proc Natl Acad Sci U S A, 2008. **105**(46): p. 18018-22.
- 927 12. Sugita, S., et al., *Synaptotagmin VII as a plasma membrane Ca<sup>2+</sup> sensor in exocytosis*. Neuron, 2001.
- 928 **30**(2): p. 459-73.
- 929 13. Schiavo, G., et al., *Binding of the synaptic vesicle v-SNARE, synaptotagmin, to the plasma membrane t-*
- 930 *SNARE, SNAP-25, can explain docked vesicles at neurotoxin-treated synapses*. Proc Natl Acad Sci U S A,
- 931 1997. **94**(3): p. 997-1001.
- 932 14. Südhof, T.C., *Neurotransmitter release: the last millisecond in the life of a synaptic vesicle*. Neuron,
- 933 2013. **80**(3): p. 675-90.
- 934 15. Südhof, T.C., *A molecular machine for neurotransmitter release: synaptotagmin and beyond*. Nat Med,
- 935 2013. **19**(10): p. 1227-31.
- 936 16. Buzsáki, G., C.A. Anastassiou, and C. Koch, *The origin of extracellular fields and currents--EEG, ECoG,*
- 937 *LFP and spikes*. Nat Rev Neurosci, 2012. **13**(6): p. 407-20.
- 938 17. Hahnloser, R.H., A.A. Kozhevnikov, and M.S. Fee, *An ultra-sparse code underlies the generation of*
- 939 *neural sequences in a songbird*. Nature, 2002. **419**(6902): p. 65-70.
- 940 18. Morrison, A., et al., *Exact subthreshold integration with continuous spike times in discrete-time neural*
- 941 *network simulations*. Neural Comput, 2007. **19**(1): p. 47-79.
- 942 19. Scott, P., A.I. Cowan, and C. Stricker, *Quantifying impacts of short-term plasticity on neuronal*
- 943 *information transfer*. Phys Rev E Stat Nonlin Soft Matter Phys, 2012. **85**(4 Pt 1): p. 041921.
- 944 20. Tsodyks, M., K. Pawelzik, and H. Markram, *Neural networks with dynamic synapses*. Neural Comput,
- 945 1998. **10**(4): p. 821-35.
- 946 21. Branco, T. and K. Staras, *The probability of neurotransmitter release: variability and feedback control*
- 947 *at single synapses*. Nat Rev Neurosci, 2009. **10**(5): p. 373-83.
- 948 22. Klaes, C., et al., *A cognitive neuroprosthetic that uses cortical stimulation for somatosensory feedback*. J
- 949 *Neural Eng*, 2014. **11**(5): p. 056024.
- 950 23. Collinger, J.L., et al., *High-performance neuroprosthetic control by an individual with tetraplegia*.
- 951 *Lancet*, 2013. **381**(9866): p. 557-64.
- 952 24. Hochberg, L.R., et al., *Neuronal ensemble control of prosthetic devices by a human with tetraplegia*.
- 953 *Nature*, 2006. **442**(7099): p. 164-71.
- 954 25. Salmasi, M., et al., *Information Rate Analysis of a Synaptic Release Site Using a Two-State Model of*
- 955 *Short-Term Depression*. Neural Comput, 2017. **29**(6): p. 1528-1560.

- 956 26. Rotman, Z., P.Y. Deng, and V.A. Klyachko, *Short-term plasticity optimizes synaptic information*  
957 *transmission*. J Neurosci, 2011. **31**(41): p. 14800-9.
- 958 27. Rosenbaum, R., J. Rubin, and B. Doiron, *Short term synaptic depression imposes a frequency dependent*  
959 *filter on synaptic information transfer*. PLoS Comput Biol, 2012. **8**(6): p. e1002557.
- 960 28. Veletić, M., et al., *On the Upper Bound of the Information Capacity in Neuronal Synapses*. IEEE  
961 Transactions on Communications, 2016. **64**(12): p. 5205-5036.
- 962 29. Vawter, M.P., et al., *Reduction of synapsin in the hippocampus of patients with bipolar disorder and*  
963 *schizophrenia*. Mol Psychiatry, 2002. **7**(6): p. 571-8.
- 964 30. Crabtree, G.W. and J.A. Gogos, *Synaptic plasticity, neural circuits, and*  
965 *the emerging role of altered short-term information processing in schizophrenia*. Front Synaptic  
966 Neurosci, 2014. **6**: p. 28.
- 967 31. Giovedi, S., et al., *Involvement of synaptic genes in the pathogenesis of autism spectrum disorders: the*  
968 *case of synapsins*. Front Pediatr, 2014. **2**: p. 94.
- 969 32. Deng, P.Y., D. Soika, and V.A. Klyachko, *Abnormal presynaptic short-term plasticity and information*  
970 *processing in a mouse model of fragile X syndrome*. J Neurosci, 2011. **31**(30): p. 10971-82.
- 971 33. Stiles, J.R. and T.M. Bartol, *Monte Carlo methods for simulating realistic synaptic microphysiology using*  
972 *MCell*, in *Computational Neuroscience: Realistic Modeling for Experimentalists*, E. De Schutter, Editor.  
973 2001, CRC Press: Boca Raton. p. 87-127.
- 974 34. Stiles, J.R., et al., *Miniature endplate current rise times less than 100 microseconds from improved dual*  
975 *recordings can be modeled with passive acetylcholine diffusion from a synaptic vesicle*. Proc Natl Acad  
976 Sci U S A, 1996. **93**(12): p. 5747-52.
- 977 35. Nadkarni, S., et al., *Modelling vesicular release at hippocampal synapses*. PLoS Comput Biol, 2010.  
978 **6**(11): p. e1000983.
- 979 36. Kerr, R.A., et al., *FAST MONTE CARLO SIMULATION METHODS FOR BIOLOGICAL REACTION-DIFFUSION*  
980 *SYSTEMS IN SOLUTION AND ON SURFACES*. SIAM J Sci Comput, 2008. **30**(6): p. 3126.
- 981 37. Bartol, T.M., et al., *Computational reconstitution of spine calcium transients from individual proteins*.  
982 Front Synaptic Neurosci, 2015. **7**: p. 17.
- 983 38. Coggan, J.S., et al., *Evidence for ectopic neurotransmission at a neuronal synapse*. Science, 2005.  
984 **309**(5733): p. 446-51.
- 985 39. Sargent, P.B., *Nicotinic receptors concentrated in the subsynaptic membrane do not contribute*  
986 *significantly to synaptic currents at an embryonic synapse in the chicken ciliary ganglion*. J Neurosci,  
987 2009. **29**(12): p. 3749-59.
- 988 40. Fioravante, D. and W.G. Regehr, *Short-term forms of presynaptic plasticity*. Curr Opin Neurobiol, 2011.  
989 **21**(2): p. 269-74.
- 990 41. Moulder, K.L. and S. Mennerick, *Reluctant vesicles contribute to the total readily releasable pool in*  
991 *glutamatergic hippocampal neurons*. J Neurosci, 2005. **25**(15): p. 3842-50.
- 992 42. Sakaba, T. and E. Neher, *Calmodulin mediates rapid recruitment of fast-releasing synaptic vesicles at a*  
993 *calyx-type synapse*. Neuron, 2001. **32**(6): p. 1119-31.
- 994 43. Lee, J.S., W.K. Ho, and S.H. Lee, *Actin-dependent rapid recruitment of reluctant synaptic vesicles into a*  
995 *fast-releasing vesicle pool*. Proc Natl Acad Sci U S A, 2012. **109**(13): p. E765-74.
- 996 44. Lee, J.S., et al., *Superpriming of synaptic vesicles after their recruitment to the readily releasable pool*.  
997 Proc Natl Acad Sci U S A, 2013. **110**(37): p. 15079-84.
- 998 45. Nadkarni, S., et al., *Short-term plasticity constrains spatial organization of a hippocampal presynaptic*  
999 *terminal*. Proc Natl Acad Sci U S A, 2012. **109**(36): p. 14657-62.
- 1000 46. Warren, C.S., et al., *A cautionary note on implications of the well-mixed compartment assumption as*  
1001 *applied to mass balance models of chemical fate in flowing systems*. Environ Toxicol Chem, 2009.  
1002 **28**(9): p. 1858-65.
- 1003 47. Franks, K.M. and T.J. Sejnowski, *Complexity of calcium signaling in synaptic spines*. Bioessays, 2002.  
1004 **24**(12): p. 1130-44.
- 1005 48. Varoqueaux, F., et al., *Total arrest of spontaneous and evoked synaptic transmission but normal*  
1006 *synaptogenesis in the absence of Munc13-mediated vesicle priming*. Proc Natl Acad Sci U S A, 2002.  
1007 **99**(13): p. 9037-42.



- 1008 49. Imig, C., et al., *The Morphological and Molecular Nature of Synaptic Vesicle Priming at Presynaptic*  
1009 *Active Zones*. *Neuron*, 2014. **84**: p. 416-431.
- 1010 50. Sudhof, T.C., *The synaptic vesicle cycle*. *Annu Rev Neurosci*, 2004. **27**: p. 509-47.
- 1011 51. Südhof, T.C. and J.E. Rothman, *Membrane fusion: grappling with SNARE and SM proteins*. *Science*,  
1012 2009. **323**(5913): p. 474-7.
- 1013 52. Tang, J., et al., *A complexin/syntaxin 1 switch controls fast synaptic vesicle exocytosis*. *Cell*, 2006.  
1014 **126**(6): p. 1175-87.
- 1015 53. Sun, J., et al., *A dual-Ca<sup>2+</sup>-sensor model for neurotransmitter release in a central synapse*. *Nature*, 2007.  
1016 **450**(7170): p. 676-82.
- 1017 54. Luo, F., T. Bacaj, and T.C. Südhof, *Syntaxin-7 Is Essential for Ca<sup>2+</sup>-Triggered Delayed*  
1018 *Asynchronous Release But Not for Ca<sup>2+</sup>-Dependent Vesicle Priming in Retinal Ribbon Synapses*. *J*  
1019 *Neurosci*, 2015. **35**(31): p. 11024-33.
- 1020 55. Bacaj, T., et al., *Syntaxin-1 and -7 Are Redundantly Essential for Maintaining the Capacity of the*  
1021 *Readily-Releasable Pool of Synaptic Vesicles*. *PLoS Biol*, 2015. **13**(10): p. e1002267.
- 1022 56. Bacaj, T., et al., *Syntaxin-1 and syntaxin-7 trigger synchronous and asynchronous phases of*  
1023 *neurotransmitter release*. *Neuron*, 2013. **80**(4): p. 947-59.
- 1024 57. Kochubey, O., X. Lou, and R. Schneggenburger, *Regulation of transmitter release by Ca<sup>2+</sup> and*  
1025 *syntaxin: insights from a large CNS synapse*. *Trends Neurosci*, 2011. **34**(5): p. 237-46.
- 1026 58. Schonh, J.S., et al., *Syntaxin-1 and -7 are functionally overlapping Ca<sup>2+</sup> sensors for exocytosis in*  
1027 *adrenal chromaffin cells*. *Proc Natl Acad Sci U S A*, 2008. **105**(10): p. 3998-4003.
- 1028 59. Maximov, A., et al., *Genetic analysis of syntaxin-7 function in synaptic vesicle exocytosis*. *Proc Natl*  
1029 *Acad Sci U S A*, 2008. **105**(10): p. 3986-91.
- 1030 60. Stevens, C.F. and Y. Wang, *Facilitation and depression at single central synapses*. *Neuron*, 1995. **14**(4):  
1031 p. 795-802.
- 1032 61. Dobrunz, L.E., E.P. Huang, and C.F. Stevens, *Very short-term plasticity in hippocampal synapses*. *Proc*  
1033 *Natl Acad Sci U S A*, 1997. **94**(26): p. 14843-7.
- 1034 62. Nanou, E., et al., *Calcium sensor regulation of the CaV2.1 Ca<sup>2+</sup> channel contributes to short-term*  
1035 *synaptic plasticity in hippocampal neurons*. *Proc Natl Acad Sci U S A*, 2016. **113**(4): p. 1062-7.
- 1036 63. Malgaroli, A. and R.W. Tsien, *Glutamate-induced long-term potentiation of the frequency of miniature*  
1037 *synaptic currents in cultured hippocampal neurons*. *Nature*, 1992. **357**(6374): p. 134-9.
- 1038 64. Kato, K., et al., *Increase in AMPA receptor-mediated miniature EPSC amplitude after chronic NMDA*  
1039 *receptor blockade in cultured hippocampal neurons*. *Neurosci Lett*, 2007. **418**(1): p. 4-8.
- 1040 65. Kaeser, P.S. and W.G. Regehr, *Molecular mechanisms for synchronous, asynchronous, and spontaneous*  
1041 *neurotransmitter release*. *Annu Rev Physiol*, 2014. **76**: p. 333-63.
- 1042 66. DasGupta, A., *Normal Approximations and the Central Limit Theorem*, in *Fundamentals of Probability:*  
1043 *A First Course*. 2010, Springer. p. 213-242.
- 1044 67. Kandaswamy, U., et al., *The role of presynaptic dynamics in processing of natural spike trains in*  
1045 *hippocampal synapses*. *J Neurosci*, 2010. **30**(47): p. 15904-14.
- 1046 68. Bischofberger, J., J.R. Geiger, and P. Jonas, *Timing and efficacy of Ca<sup>2+</sup> channel activation in*  
1047 *hippocampal mossy fiber boutons*. *J Neurosci*, 2002. **22**(24): p. 10593-602.
- 1048 69. Neher, E. and T. Sakaba, *Multiple roles of calcium ions in the regulation of neurotransmitter release*.  
1049 *Neuron*, 2008. **59**(6): p. 861-72.
- 1050 70. Rosahl, T.W., et al., *Short-term synaptic plasticity is altered in mice lacking synapsin I*. *Cell*, 1993.  
1051 **75**(4): p. 661-70.
- 1052 71. Thomson, A.M. and A.P. Bannister, *Release-independent depression at pyramidal inputs onto specific*  
1053 *cell targets: dual recordings in slices of rat cortex*. *J Physiol*, 1999. **519 Pt 1**: p. 57-70.
- 1054 72. Varela, J.A., et al., *A quantitative description of short-term plasticity at excitatory synapses in layer 2/3*  
1055 *of rat primary visual cortex*. *J Neurosci*, 1997. **17**(20): p. 7926-40.
- 1056 73. Zucker, R.S. and W.G. Regehr, *Short-term synaptic plasticity*. *Annu Rev Physiol*, 2002. **64**: p. 355-405.
- 1057 74. Simons, T.J., *Calcium and neuronal function*. *Neurosurg Rev*, 1988. **11**(2): p. 119-29.
- 1058 75. Grewe, B.F. and F. Helmchen, *High-speed two-photon calcium imaging of neuronal population activity*  
1059 *using acousto-optic deflectors*. *Cold Spring Harb Protoc*, 2014. **2014**(6): p. 618-29.
- 1060 76. Grienberger, C. and A. Konnerth, *Imaging calcium in neurons*. *Neuron*, 2012. **73**(5): p. 862-85.

- 1061 77. Nägerl, U.V., et al., *Binding kinetics of calbindin-D(28k) determined by flash photolysis of caged Ca(2+)*.  
1062 Biophys J, 2000. **79**(6): p. 3009-18.
- 1063 78. Sneyd, J., et al., *A model of calcium waves in pancreatic and parotid acinar cells*. Biophys J, 2003. **85**(3):  
1064 p. 1392-405.
- 1065 79. Rizzoli, S.O. and L. Tabares, *Editorial: Molecular Nanomachines of the Presynaptic Terminal*. Front  
1066 Synaptic Neurosci, 2016. **8**: p. 27.
- 1067 80. Verkhratsky, A., *The endoplasmic reticulum and neuronal calcium signalling*. Cell Calcium, 2002. **32**(5-  
1068 6): p. 393-404.
- 1069 81. Bouchard, R., R. Pattarini, and J.D. Geiger, *Presence and functional significance of presynaptic*  
1070 *ryanodine receptors*. Prog Neurobiol, 2003. **69**(6): p. 391-418.
- 1071 82. Lanner, J.T., et al., *Ryanodine receptors: structure, expression, molecular details, and function in calcium*  
1072 *release*. Cold Spring Harb Perspect Biol, 2010. **2**(11): p. a003996.
- 1073 83. Otsu, K., et al., *Molecular cloning of cDNA encoding the Ca2+ release channel (ryanodine receptor) of*  
1074 *rabbit cardiac muscle sarcoplasmic reticulum*. J Biol Chem, 1990. **265**(23): p. 13472-83.
- 1075 84. Nixon, G.F., G.A. Mignery, and A.V. Somlyo, *Immunogold localization of inositol 1,4,5-trisphosphate*  
1076 *receptors and characterization of ultrastructural features of the sarcoplasmic reticulum in phasic and*  
1077 *tonic smooth muscle*. J Muscle Res Cell Motil, 1994. **15**(6): p. 682-700.
- 1078 85. Mikoshiba, K., *The IP3 receptor/Ca2+ channel and its cellular function*. Biochem Soc Symp, 2007(74):  
1079 p. 9-22.
- 1080 86. de Juan-Sanz, J., et al., *Axonal Endoplasmic Reticulum Ca(2+) Content Controls Release Probability in*  
1081 *CNS Nerve Terminals*. Neuron, 2017. **93**(4): p. 867-881.e6.
- 1082 87. Hardie, J. and A. Lee, *Decalmodulation of Cav1 channels by CaBPs*. Channels (Austin), 2016. **10**(1): p.  
1083 33-7.
- 1084 88. Lee, A., et al., *Differential modulation of Ca(v)2.1 channels by calmodulin and Ca2+-binding protein 1*.  
1085 Nat Neurosci, 2002. **5**(3): p. 210-7.
- 1086 89. Catterall, W.A., K. Leal, and E. Nanou, *Calcium channels and short-term plasticity*. J Biol Chem, 2013.  
1087 **288**(15): p. 10742-9.
- 1088 90. Ben-Johny, M. and D.T. Yue, *Calmodulin regulation (calmodulation) of voltage-gated calcium channels*.  
1089 J Gen Physiol, 2014. **143**(6): p. 679-92.
- 1090 91. Fuhrmann, G., et al., *Multiple mechanisms govern the dynamics of depression at neocortical synapses of*  
1091 *young rats*. J Physiol, 2004. **557**(Pt 2): p. 415-38.
- 1092 92. Schwaller, B., *Cytosolic Ca2+ buffers*. Cold Spring Harb Perspect Biol, 2010. **2**(11): p. a004051.
- 1093 93. Timofeeva, Y. and K.E. Volynski, *Calmodulin as a major calcium buffer shaping vesicular release and*  
1094 *short-term synaptic plasticity: facilitation through buffer dislocation*. Front Cell Neurosci, 2015. **9**: p.  
1095 239.
- 1096 94. Blum, J.J., et al., *Effect of cytoskeletal geometry on intracellular diffusion*. Biophys J, 1989. **56**(5): p.  
1097 995-1005.
- 1098 95. Novak, I.L., P. Kraikivski, and B.M. Slepchenko, *Diffusion in cytoplasm: effects of excluded volume due to*  
1099 *internal membranes and cytoskeletal structures*. Biophys J, 2009. **97**(3): p. 758-67.
- 1100 96. Neher, E., *Merits and Limitations of Vesicle Pool Models in View of Heterogeneous Populations of*  
1101 *Synaptic Vesicles*. Neuron, 2015. **87**(6): p. 1131-42.
- 1102 97. Tsodyks, M.V. and H. Markram, *The neural code between neocortical pyramidal neurons depends on*  
1103 *neurotransmitter release probability*. Proc Natl Acad Sci U S A, 1997. **94**(2): p. 719-23.
- 1104 98. Cortes, J.M., et al., *Short-term synaptic plasticity in the deterministic Tsodyks-*  
1105 *Markram model leads to unpredictable network dynamics*. Proc Natl Acad Sci U S A, 2013. **110**(41): p.  
1106 16610-5.
- 1107 99. Faisal, A.A., L.P. Selen, and D.M. Wolpert, *Noise in the nervous system*. Nat Rev Neurosci, 2008. **9**(4): p.  
1108 292-303.
- 1109 100. Faber, D.S., et al., *Intrinsic quantal variability due to stochastic properties of receptor-transmitter*  
1110 *interactions*. Science, 1992. **258**(5087): p. 1494-8.
- 1111 101. Otmakhov, N., A.M. Shirke, and R. Malinow, *Measuring the impact of probabilistic transmission on*  
1112 *neuronal output*. Neuron, 1993. **10**(6): p. 1101-11.

- 1113 102. Seung, H.S., *Learning in spiking neural networks by reinforcement of stochastic synaptic transmission*.  
1114 Neuron, 2003. **40**(6): p. 1063-73.
- 1115 103. Buesing, L., et al., *Neural dynamics as sampling: a model for stochastic computation in recurrent*  
1116 *networks of spiking neurons*. PLoS Comput Biol, 2011. **7**(11): p. e1002211.
- 1117 104. Maass, W. and A.M. Zador, *Dynamic stochastic synapses as computational units*. Neural Comput, 1999.  
1118 **11**(4): p. 903-17.
- 1119 105. Goda, Y. and C.F. Stevens, *Two components of transmitter release at a central synapse*. Proc Natl Acad  
1120 Sci U S A, 1994. **91**(26): p. 12942-6.
- 1121 106. Smith, S.M., et al., *Calcium regulation of spontaneous and asynchronous neurotransmitter release*. Cell  
1122 Calcium, 2012. **52**(3-4): p. 226-33.
- 1123 107. Fortune, E.S. and G.J. Rose, *Short-term synaptic plasticity as a temporal filter*. Trends Neurosci, 2001.  
1124 **24**(7): p. 381-5.
- 1125 108. Izhikevich, E.M., et al., *Bursts as a unit of neural information: selective communication via resonance*.  
1126 Trends Neurosci, 2003. **26**(3): p. 161-7.
- 1127 109. Lee, C.C., et al., *A kinetic model unifying presynaptic short-term facilitation and depression*. J Comput  
1128 Neurosci, 2009. **26**(3): p. 459-73.
- 1129 110. Neher, E., *What is Rate-Limiting during Sustained Synaptic Activity: Vesicle Supply or the Availability of*  
1130 *Release Sites*. Front Synaptic Neurosci, 2010. **2**: p. 144.
- 1131 111. Singh, N., et al., *Presynaptic Endoplasmic Reticulum Contributes Crucially to Short-term Plasticity in*  
1132 *Small Hippocampal Synapses*. bioRxiv, 2018: p. 431866.
- 1133 112. Pan, X., et al., *The physiological role of mitochondrial calcium revealed by mice lacking the*  
1134 *mitochondrial calcium uniporter*. Nat Cell Biol, 2013. **15**(12): p. 1464-72.
- 1135 113. Contractor, A., V.A. Klyachko, and C. Portera-Cailliau, *Altered Neuronal and Circuit Excitability in*  
1136 *Fragile X Syndrome*. Neuron, 2015. **87**(4): p. 699-715.
- 1137 114. Corlew, R., et al., *Presynaptic NMDA receptors: newly appreciated roles in cortical synaptic function and*  
1138 *plasticity*. Neuroscientist, 2008. **14**(6): p. 609-25.
- 1139 115. Rodriguez-Moreno, A. and O. Paulsen, *Spike timing-dependent long-term depression requires*  
1140 *presynaptic NMDA receptors*. Nat Neurosci, 2008. **11**(7): p. 744-5.
- 1141 116. Duguid, I.C. and T.G. Smart, *Retrograde activation of presynaptic NMDA receptors enhances GABA*  
1142 *release at cerebellar interneuron-Purkinje cell synapses*. Nat Neurosci, 2004. **7**(5): p. 525-33.
- 1143 117. Ohno-Shosaku, T., et al., *Endocannabinoid signalling triggered by NMDA receptor-mediated calcium*  
1144 *entry into rat hippocampal neurons*. J Physiol, 2007. **584**(Pt 2): p. 407-18.
- 1145 118. Navarrete, M., A. Diez, and A. Araque, *Astrocytes in endocannabinoid signalling*. Philos Trans R Soc  
1146 Lond B Biol Sci, 2014. **369**(1654): p. 20130599.
- 1147 119. Piomelli, D., *The molecular logic of endocannabinoid signalling*. Nat Rev Neurosci, 2003. **4**(11): p. 873-  
1148 84.
- 1149 120. van den Bogaart, G., et al., *One SNARE complex is sufficient for membrane fusion*. Nat Struct Mol Biol,  
1150 2010. **17**(3): p. 358-64.
- 1151 121. Mohrmann, R., et al., *Fast vesicle fusion in living cells requires at least three SNARE complexes*. Science,  
1152 2010. **330**(6003): p. 502-5.
- 1153 122. Albert, A., *Estimating the Infinitesimal Generator of a Continuous Time, Finite State Markov Process*.  
1154 The Annals of Mathematical Statistics, 1962. **33**(2): p. 727-753.
- 1155 123. Nelder, J.A. and R. Mead, *A Simplex Method for Function Minimization* Comput J, 1965. **7**(4): p. 308-  
1156 313.
- 1157 124. McKinnon, K.I.M., *Convergence of the Nelder--Mead Simplex Method to a Nonstationary Point*. SIAM J.  
1158 Optim., 1998. **9**(1): p. 148-158.
- 1159 125. Lagarias, J., et al., *Convergence Properties of the Nelder--Mead Simplex Method in Low Dimensions*.  
1160 SIAM Journal on Optimization, 1998. **9**(1): p. 112-147.
- 1161 126. Körber, C. and T. Kuner, *Molecular Machines Regulating the Release Probability of Synaptic Vesicles at*  
1162 *the Active Zone*. Front Synaptic Neurosci, 2016. **8**: p. 5.
- 1163 127. Sakaba, T., *Roles of the fast-releasing and the slowly releasing vesicles in synaptic transmission at the*  
1164 *calyx of Held*. J Neurosci, 2006. **26**(22): p. 5863-71.



- 1165 128. Schneggenburger, R. and E. Neher, *Intracellular calcium dependence of transmitter release rates at a*  
1166 *fast central synapse*. Nature, 2000. **406**(6798): p. 889-93.
- 1167 129. Wölfel, M., X. Lou, and R. Schneggenburger, *A mechanism intrinsic to the vesicle fusion machinery*  
1168 *determines fast and slow transmitter release at a large CNS synapse*. J Neurosci, 2007. **27**(12): p. 3198-  
1169 210.
- 1170 130. Xu, J., et al., *Synaptotagmin-1 functions as a Ca<sup>2+</sup> sensor for spontaneous release*. Nat Neurosci, 2009.  
1171 **12**(6): p. 759-66.
- 1172 131. Delvendahl, I., et al., *Reduced endogenous Ca<sup>2+</sup> buffering speeds active zone Ca<sup>2+</sup> signaling*. Proc Natl  
1173 Acad Sci U S A, 2015. **112**(23): p. E3075-84.
- 1174
