# Supplementary material for: Multiscale modeling of presynaptic dynamics from molecular to mesoscale
Source: bioRxiv or medRxiv preprint supplement (doi:10.1101/2021.04.16.440229), 2021-08-16
Supplement: Supplementary file [file media-1.pdf]

# 1 Supporting Information

## 2 **Estimating $[Ca^{2+}]_i$ from Collision Events**

3 Because of the quantized nature and low concentration of  $Ca^{2+}$  ions in the presynaptic space, calculating  
4 the instantaneous local calcium concentration just around the SNARE complex of a single docked vesicle  
5 is nontrivial in MCell. Instead, we use effector tiles, small virtual surfaces in the presynaptic space of the  
6 MCell environment, to estimate local concentration from the frequency of calcium ions passing through  
7 them. This section provides a derivation of average  $[Ca^{2+}]_i$  from the number of “hits”,  $N_H$ , of calcium ions  
8 through the effector tile surface.

9 For a particle diffusing by Brownian motion in  $d$  dimensions, the probability density function  $\rho$  of the  
10 particle’s displacement  $r$  from its initial position after a time  $\Delta t$  is equal to

$$\rho(r, \Delta t) = \frac{1}{\pi^{d/2} \lambda^d} e^{-r^2/\lambda^2}, \quad (28)$$

11 where  $\lambda$  is a diffusion length parameter that depends on the diffusion constant and time step. Since we  
12 are dealing with calcium, we use

$$\lambda_{Ca} = \sqrt{4D_{Ca}\Delta t}, \quad (29)$$

13 where  $D_{Ca} = 220 \mu m^2/sec$  is the calcium diffusion constant [35]. More directly useful, though, is the  
14 average step length along any given axis, in particular, along the component perpendicular to the  
15 calcium-detecting surface:

$$\bar{l}_\perp = \frac{\lambda_{Ca}}{\sqrt{\pi}} = \sqrt{\frac{4D_{Ca}\Delta t}{\pi}}. \quad (30)$$

16 Thinking about the effective volume near the effector tile, the expected number of hits of particles  
17 through the surface from either side during the interval  $\Delta t$  becomes

$$N_H = N_A \bar{l}_\perp A_{ET} [\text{Ca}^{2+}]_i, \quad (31)$$

18 where  $N_A$  is Avogadro's number and  $A_{ET}$  is the area of the effector tile. Solving for concentration,

$$[\text{Ca}^{2+}]_i = \frac{N_H}{N_A \bar{l}_\perp A_{ET}}. \quad (32)$$

19 Now, the average concentration from the start of the simulation until time  $t$  becomes

$$c(t) = \frac{N_H(t)}{N_A \bar{l}_\perp A_{ET}} \cdot \frac{\Delta t}{t}, \quad (33)$$

20 where  $N_H(t)$  is the running total number of hits. To find the average  $\text{Ca}^{2+}$  concentration over an  
21 arbitrary interval  $[t_i, t_j]$ :

$$\langle [\text{Ca}^{2+}]_i([t_i, t_j]) \rangle = \frac{t_j c(t_j) - t_i c(t_i)}{t_j - t_i}. \quad (34)$$

22 For each spike train used as input to the simulation, we averaged the instantaneous local active zone  
23 calcium concentration over 2000 trials in time steps of 0.1 ms.

## 24 **Chemical Kinetics of Calcium Channels, Buffers, and Pumps**

25 The kinetic schemes and kinetic rate constants for the voltage-dependent calcium channel (VDCC),  
26 calbindin (CB), and plasma membrane  $\text{Ca}^{2+}$ -ATPase (PMCA) pump models used for this paper, along with  
27 their associated references, are shown below in S1 Fig and S1 Table.

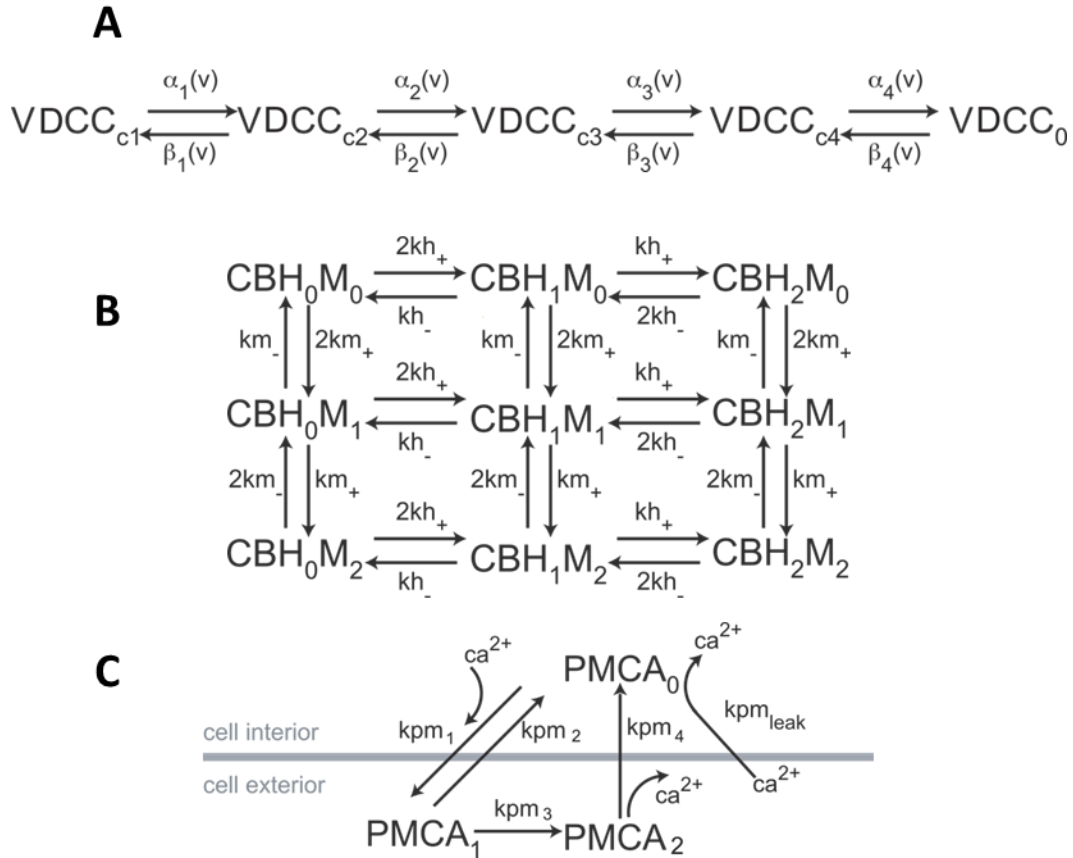

28  
29  
30  
31  
32  
33  
34  
35  
36  
37  
38

**S1 Fig. State Diagrams for VDCC, Calbindin, and PMCA.**

All diagrams reproduced with permission from Nadkarni et al. [35]. A: VDCC state transition model adapted from Bischofberger et al.[68]. Transition rates  $\alpha_{ij}$  and  $\beta_{ji}$  depend on membrane potential  $v$ . B: State transitions for calbindin (CB) at high-affinity (H) and medium-affinity (M)  $\text{Ca}^{2+}$ -binding sites. On rates ( $kh_+$  and  $km_+$ ) are proportional to  $[\text{Ca}^{2+}]_i$ . C: PMCA pump state diagram with  $\text{Ca}^{2+}$  interactions depicted on the relative side of the membrane.  $\text{Ca}^{2+}$  leakage occurs only in state  $\text{PMCA}_0$ . Association rate  $kpm_1$  is proportional to  $[\text{Ca}^{2+}]_i$ .

39 **S1 Table. Parameter Values for VDCC, Calbindin, and PMCA.**

40 Table adapted from [35]. VDCC rates follow  $\alpha_i(v)=\alpha_{i0}\exp(v/v_i)$  and  $\beta_i(v)=\beta_{i0}\exp(-v/v_i)$ . VDCC parameters  
 41 values adapted from [68]. Calbindin parameter values adapted from [77]. PMCA parameter values  
 42 adapted from [78].

| Parameter                                            | Value                                          |
|------------------------------------------------------|------------------------------------------------|
| <b>VDCC - [68]</b>                                   |                                                |
| $\alpha_{10}, \alpha_{20}, \alpha_{30}, \alpha_{40}$ | 4.04, 6.70, 4.39, 17.33 ms <sup>-1</sup>       |
| $\beta_{10}, \beta_{20}, \beta_{30}, \beta_{40}$     | 2.88, 6.30, 8.16, 1.84 ms <sup>-1</sup>        |
| $v_1, v_2, v_3, v_4$                                 | 49.14, 42.08, 55.31, 26.55 mV                  |
| <b>Calbindin-D28k - [77]</b>                         |                                                |
| $kh_+$                                               | $5.5 \times 10^6 \text{ M}^{-1}\text{s}^{-1}$  |
| $kh_-$                                               | 2.6 s <sup>-1</sup>                            |
| $km_+$                                               | $4.35 \times 10^7 \text{ M}^{-1}\text{s}^{-1}$ |
| $km_-$                                               | 35.8 s <sup>-1</sup>                           |
| <b>PMCA - [35, 78]</b>                               |                                                |
| $kpm_1$                                              | $1.5 \times 10^8 \text{ M}^{-1}\text{s}^{-1}$  |
| $kpm_2$                                              | 20 s <sup>-1</sup>                             |
| $kpm_3$                                              | 100 s <sup>-1</sup>                            |
| $kpm_4$                                              | $1.0 \times 10^5 \text{ s}^{-1}$               |
| $kpm_{leak}$                                         | 12.264 s <sup>-1</sup>                         |

43  
 44 In response to an action potential stimulus, voltage-dependent Ca<sup>2+</sup> channels (VDCCs) transition  
 45 stochastically to an open state, through which Ca<sup>2+</sup> ions may enter the axon down a sharp  
 46 electrochemical gradient [68, 126]. Because this process does not depend on diffusion, a deterministic  
 47 simulation of state probabilities can perfectly capture the shape of the histogram of Ca<sup>2+</sup> influx rate  
 48 averaged over infinite trials, as in S2 Fig. Notice that the rate of influx rises to a peak and returns  
 49 completely to baseline within a span of about 2 ms, so any spike-evoked vesicle fusion after this initial

50 influx is due entirely to internal dynamics as  $\text{Ca}^{2+}$  diffuses, interacts with the buffer and  $\text{Ca}^{2+}$  sensors, and  
51 vacates through the pumps.

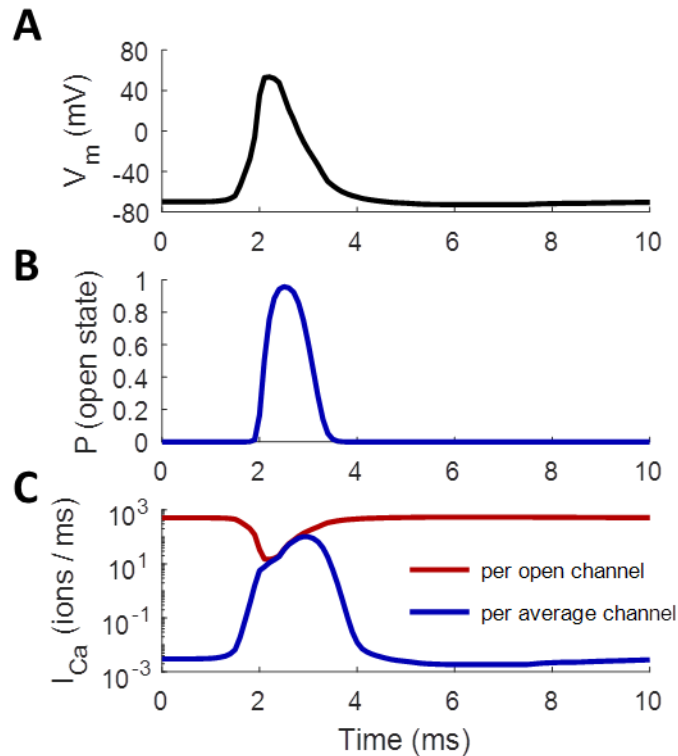

52  
53 **S2 Fig. Action-Potential-Evoked  $\text{Ca}^{2+}$  Current.**

54 A: Action-potential-like waveform applied to axon. B: Probability of a single VDCC being in the open  
55 state in response to the action potential in panel A increases from about  $10^{-5}$  to around 96% during the  
56 spike before quickly shutting off; computed from deterministic simulation of state probabilities. C: Rate  
57 of  $\text{Ca}^{2+}$  influx through a single, pathologically open channel (red) and through a typical channel (blue),  
58 whose probability of being open follows B.

59  
60 Of course, the existence of a nonzero  $[\text{Ca}^{2+}]_{i0}$  implies that the  $\text{Ca}^{2+}$ -sensors of the SNARE complex will  
61 induce vesicle fusion at some finite, if extremely slow, rate. At very low concentrations, this would  
62 require anywhere from many thousands to many trillions of trials to build up sufficiently informative  
63 release histograms. Instead, we reran the deterministic model at constant values of  $[\text{Ca}^{2+}]_i$  with no  $\text{Ca}^{2+}$   
64 spike and measured the steady-state release rates after 10 seconds of simulated time (S3 Fig). Perhaps  
65 unsurprisingly, the spontaneous release rates grow in proportion to the 5<sup>th</sup> (2<sup>nd</sup>) power of  $[\text{Ca}^{2+}]_{i0}$  for  
66 synchronous (asynchronous) release, according to the number of  $\text{Ca}^{2+}$  ions needed to bind before the

67 synaptotagmin can initiate fusion. At very high  $[Ca^{2+}]_{i0}$ , though, the release rates saturate to  $\gamma_S$  and  $\gamma_A$   
 68 (see Table 1) as the probability of being in the releasable state approaches one.

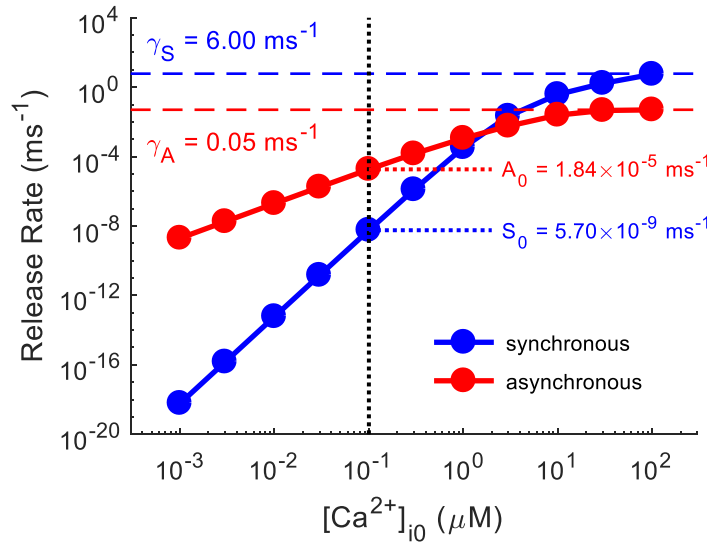

69  
 70 **S3 Fig. Spontaneous Rates of Vesicle Fusion Increase with  $[Ca^{2+}]_{i0}$ .**  
 71 For small  $[Ca^{2+}]_{i0}$ ,  $S_0 = k_S \cdot ([Ca^{2+}]_{i0})^5$  and  $A_0 = k_A \cdot ([Ca^{2+}]_{i0})^2$ , where  $k_S \approx 6 \times 10^{-4} \text{ ms}^{-1} \cdot \mu\text{M}^{-5}$  and  $k_A \approx 2 \times 10^{-3} \text{ ms}^{-1} \cdot \mu\text{M}^{-2}$ . As  $[Ca^{2+}]_{i0} \rightarrow \infty$ ,  $S_0 \rightarrow \gamma_S$  and  $A_0 \rightarrow \gamma_A$ . Values for  $S_0$  and  $A_0$  at  $[Ca^{2+}]_{i0} = 100 \text{ nM}$ , which is used  
 72 throughout most of this paper, are pointed out for reference.  
 73  
 74

### 75 Effects of Buffer and Spatial Modeling on Release Dynamics

76 Running these simulations in MCell, rather than as a much simpler well-mixed model, was essential for  
 77 capturing both distance-dependent effects and temporal features of the  $Ca^{2+}$  waveform. The well-mixed  
 78 assumption, which ignores diffusion and treats all chemical processes as occurring at the same point in  
 79 space, does not hold at the spatial and temporal scales of interest in the synapse [46, 47]. As seen in Fig  
 80 2C, peak  $Ca^{2+}$  drops precipitously even over fractions of a micron away from the VDCC cluster, and the  
 81 shape of the response changes dramatically over this same scale, transitioning from a predominantly  
 82 synchronous to a predominantly asynchronous profile. These trends, elucidated by the spatial MCell  
 83 simulation, are completely absent in the space-less well-mixed simulation (maroon curves, S4 Fig), even  
 84 when all other aspects of the model remain the same, such as the number of VDCCs, calbindin buffer

85 molecules, and PMCA pumps and the set of all state transitions for each molecular species. Note also  
86 from S4 Fig A that the transition in time from the fast synchronous component to the extended  
87 asynchronous component is much sharper in the case without space. The extra  $\text{Ca}^{2+}$  decay component  
88 arises from local saturation effects. After the initial rapid influx, the calbindin buffer immediately around  
89 the VDCC cluster becomes saturated, causing the high free  $\text{Ca}^{2+}$  that remains to overwhelm the PMCA  
90 pumps' ability to evacuate it from the area. The pumps remove it at a constant maximum rate, leading  
91 to a short linear decay only evident very near the VDCCs (yellow traces, S4 Fig A) or when all calbindin is  
92 removed from the simulation (S4 Fig B). Such local saturation effects do not appear in the well-mixed  
93 case because all buffer molecules and pumps are simultaneously available to all the free  $\text{Ca}^{2+}$  ions. Thus,  
94 in light of all these effects, the spatial MCell model is crucial for the task of properly characterizing the  
95  $\text{Ca}^{2+}$  transient in the synapse.

96

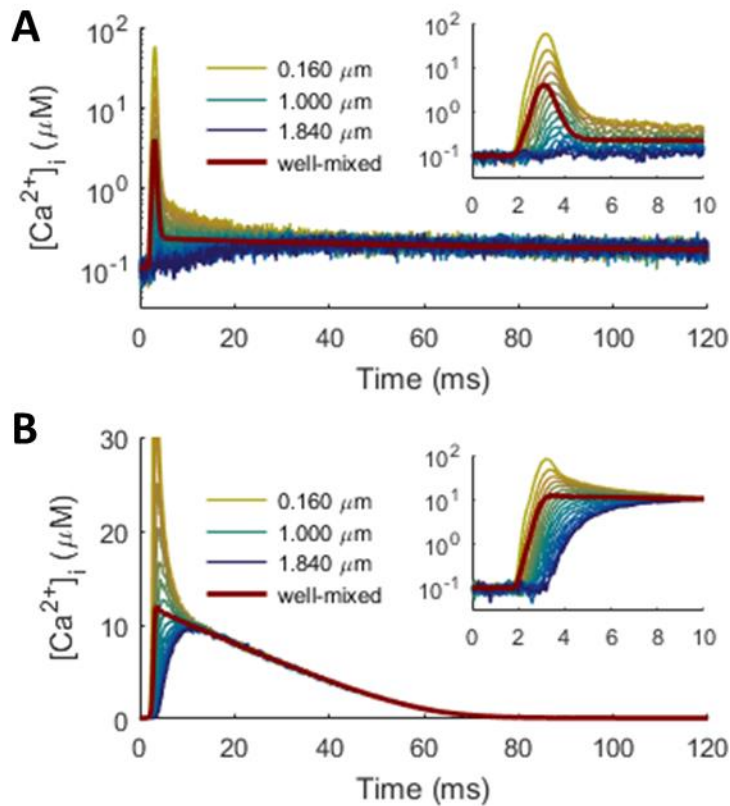

97  
 98 **S4 Fig. Spatial Modeling Important for Capturing Fine-Grain Features of  $Ca^{2+}$  Transients.**

99 Color scheme identical to that used in Fig 2: yellow to blue represent proximal to distal  $Ca^{2+}$  sensors. A:  
 100  $[Ca^{2+}]_i$  measured at increasing distance from VDCC source (yellow to blue), with well-mixed  
 101 approximation overlaid for comparison (maroon). Inset focuses on shorter time scale. B: Profiles with  
 102 calbindin removed from MCell (yellow to blue) and well-mixed model (maroon). Note that peak  $[Ca^{2+}]_i$   
 103 for the most proximal case extends up to 81  $\mu M$ , but is cut off for clarity.

104  
 105 Most neurotransmitter release occurs within a sharp window after an action potential stimulus [127-  
 106 130]. The presence of the  $Ca^{2+}$  buffer calbindin plays an instrumental role in this by rapidly removing  
 107 most of the free  $Ca^{2+}$  and then slowly releasing it over an extended period at a rate that the active PMCA  
 108 pumps can handle. This action significantly tightens the window for Syt-1-mediated synchronous release  
 109 [40, 131] while also extending the time window for Syt-7-mediated asynchronous release. Without a  
 110 buffer, however, the free  $[Ca^{2+}]_i$  does not drop off immediately but decays linearly toward baseline over  
 111 a few tens of milliseconds, saturating the capacity of the PMCA pumps to remove the ions (S4 Fig B, S5  
 112 Fig A,C). Thus, removing calbindin from the simulations both amplifies synchronous release in a time



113 window near the spike and suppresses asynchronous release long after the stimulus (S5 Fig B,D). This  
 114 agrees with experimental evidence that endogenous  $\text{Ca}^{2+}$  buffers limit the rate of synchronous synaptic  
 115 release [131].

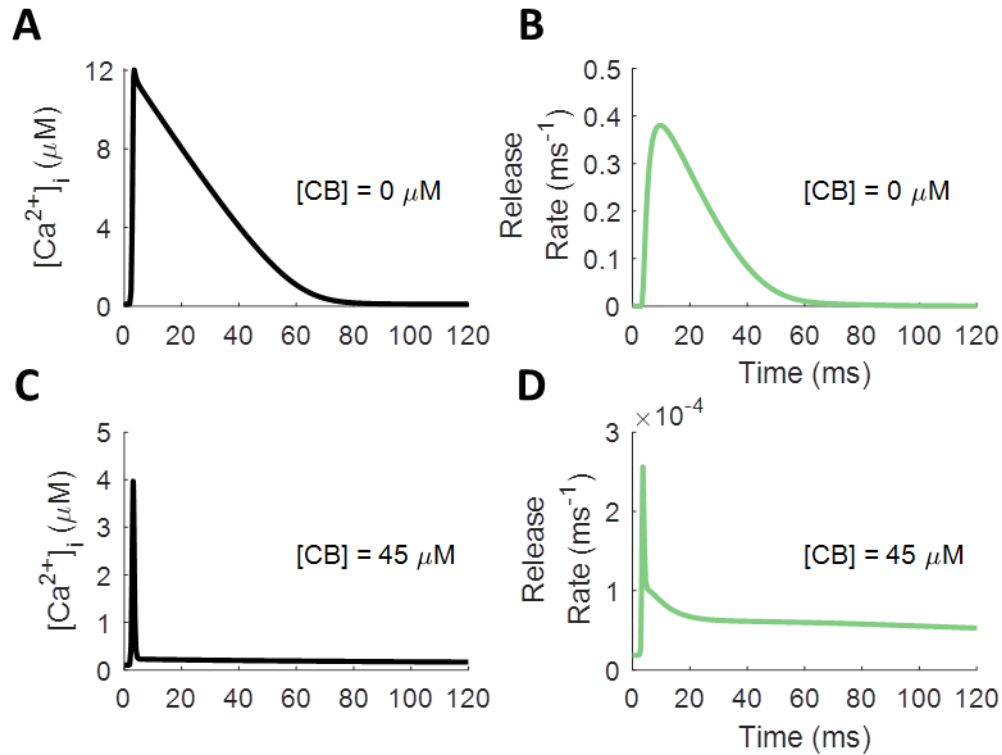

116 **S5 Fig. Effect of Calbindin Buffer on Spike-Evoked  $\text{Ca}^{2+}$  Profile and Release Rates.**  
 117 Action-potential-like stimulus delivered to model axon starting at 0 ms. Diffusion is assumed to be  
 118 instantaneous, and molecular state probabilities are tracked deterministically over time. A: Free  $[\text{Ca}^{2+}]_i$   
 119 with no calbindin buffer decays linearly with time due to saturation of PMCA pumps. B: Syt-1/7-  
 120 mediated release rates are large but short-lived in response to unbuffered  $\text{Ca}^{2+}$ . C: Free  $[\text{Ca}^{2+}]_i$  with  
 121 calbindin added to the axon has much smaller magnitude and much narrower peak but has much longer  
 122 tail. D: Vesicle release in response to buffered  $\text{Ca}^{2+}$  is much less pronounced. The calbindin buffer  
 123 reduces the rate of synchronous transmission but extends the window for pronounced asynchronous  
 124 transmission.  
 125

126  
 127 After obtaining the distance-dependent  $\text{Ca}^{2+}$  traces, we could use them to see how the rate of release  
 128 changes with distance. Using the above-measured  $\text{Ca}^{2+}$  traces as input to the deterministic Markov  
 129 model of Syt-1/7, we once again calculated the instantaneous rates of spike-evoked release for single  
 130 vesicles at increasing distances. As expected, the single-vesicle probability of release decays with

131 distance until it reaches a distance-independent baseline level (S6 Fig), although this occurs differently  
 132 for the synchronous and asynchronous mechanisms.

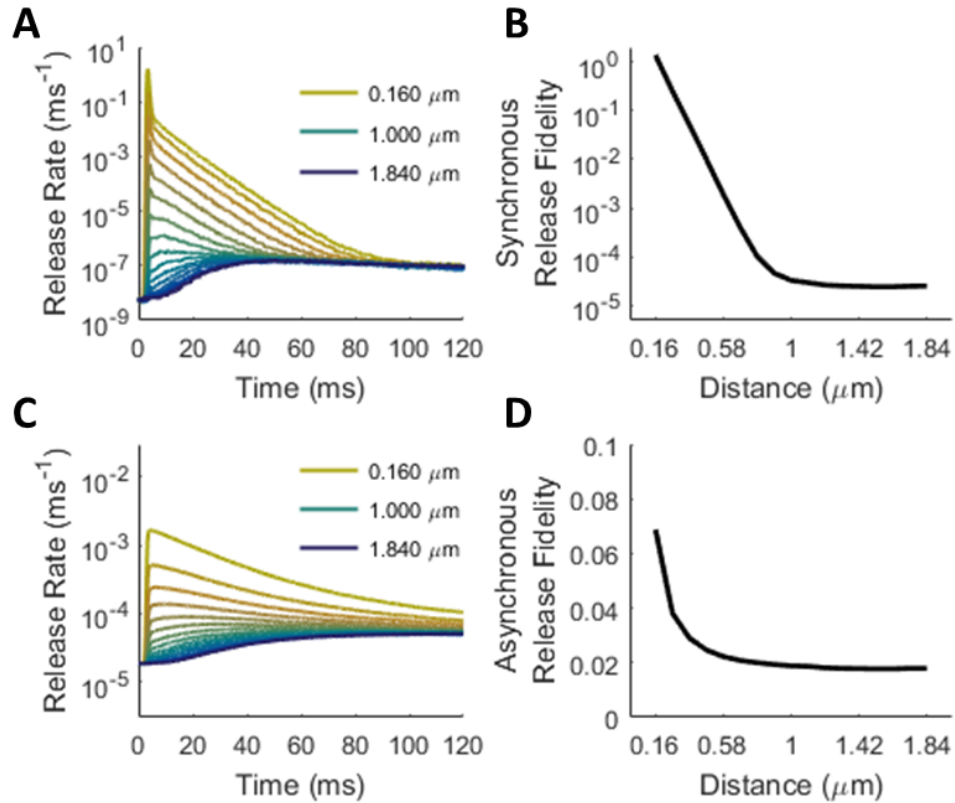

133 **S6 Fig. Synchronous and Asynchronous Release Rates Decrease with Distance from the**  
 134 **Ca<sup>2+</sup> Source.**

135 Color scheme identical to that used in Fig 2 and S4 Fig: yellow to blue represent proximal to distal Ca<sup>2+</sup>  
 136 sensors. A: Synchronous release rate. B: Integrated probability of synchronous release falls off nearly  
 137 exponentially with distance to a baseline level. C: Asynchronous release rates. D: Integrated probability  
 138 of asynchronous release also decays with distance to some baseline, but not exponentially.  
 139

140  
 141 To account for the change in release profiles mathematically, we ran a fitting algorithm on each profile,  
 142 exploring the space of values both for the magnitude of each component of release ( $P_c$  in Eq (1) and (3))  
 143 and for the temporal filter parameters ( $k_c$ ,  $\mu_c$ , and  $\sigma_c$  in Eq (3) and (4)). We assumed that the time  
 144 constants of release rate decay ( $\tau_c$ ) remained the same for the release histograms at all distances and  
 145 that any changes in the size or shape in the histograms are due to depleted levels of  $[Ca^{2+}]_i$  and to  
 146 increasing delays for Ca<sup>2+</sup> ions to reach the sensors. Accordingly, we expected to see the  $P_c$  values decay

147 with distance as  $\text{Ca}^{2+}$  is dissipated, sequestered, and removed; the  $k_c$  values to slow down as the limiting  
 148 delay grows with distance; and the values of  $\mu_c$  and  $\sigma_c$  to increase somewhat due to greater numbers of  
 149 potential interactions before the  $\text{Ca}^{2+}$  ions complete their traversal. The fitting algorithm produced sets  
 150 of parameters at each location in the synapse that generally followed these trends (S7 Fig C,D), although  
 151 the noise in the data and the very high dimensionality of the problem prevented smooth trends from  
 152 being ascertained.

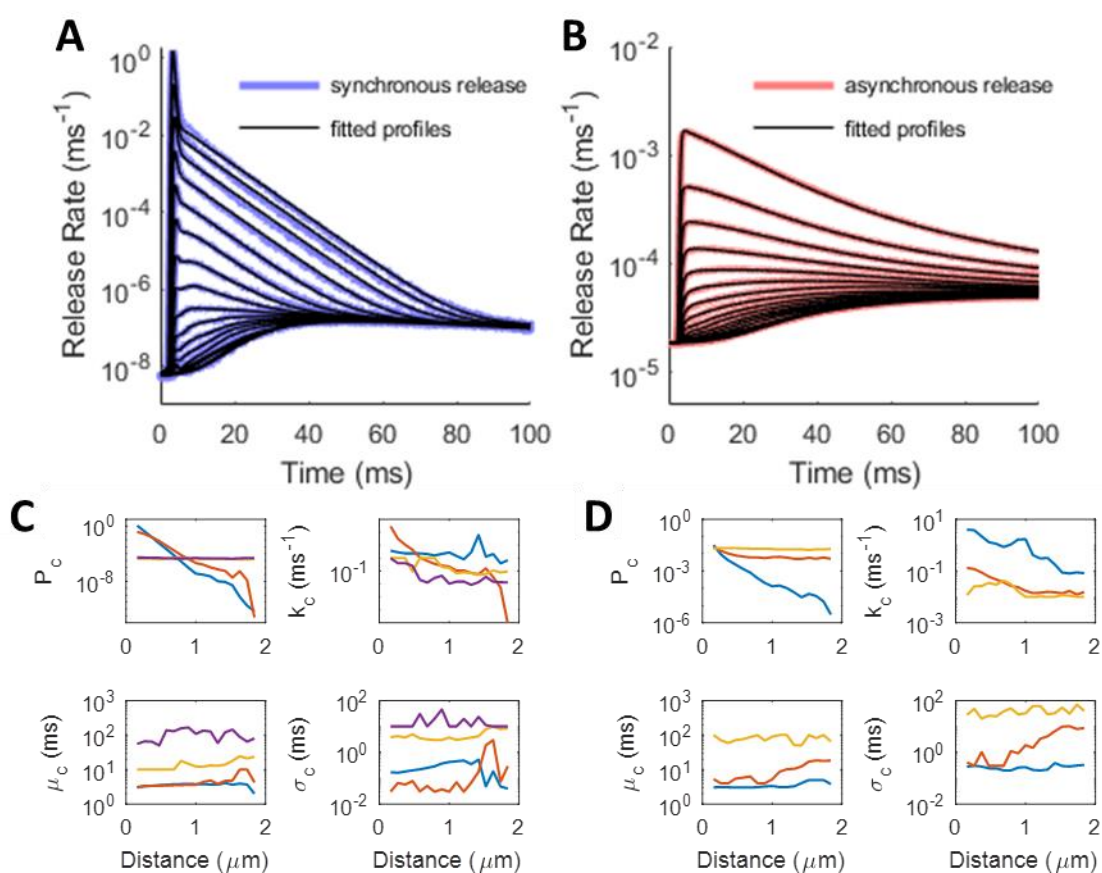

153 **S7 Fig. Parametric Fits to Release Histogram Profiles at Increasing Distance from the  $\text{Ca}^{2+}$**   
 154 **Source.**  
 155

156 A, B: Fitted release profiles (black) imposed over the true histograms for synchronous (A, blue) and  
 157 asynchronous (B, red). C: Parameter values as a function of distance for synchronous release. D: The  
 158 same for asynchronous release.

159  
 160

## 161 **Applying Release Start Time Filter to Release Rate Profiles**

162 The release-start-time filter introduced in Eq (3) and (4) follows an ex-Gaussian distribution,  
 163  $a(t; k_c, \mu_c, \sigma_c)$ , representing trial-to-trial variation in the start time for spike-evoked release due to the  
 164 stochasticity of buffered diffusion. This can be treated as adding an exponentially distributed random  
 165 delay with rate parameter  $k$  and a normally distributed random delay with mean  $\mu$  and standard  
 166 deviation  $\sigma$  to the spike time at  $t = 0$ , removing subscripts for simplicity. Applying this filter to a release  
 167 profile component  $r(t) = P/\tau \left( e^{-t/\tau} u(t) \right)$  from Eq (1) and (3) requires performing a convolution  
 168 operation as shown below:

$$\begin{aligned}
 r(t) &= \frac{P}{\tau} \left( e^{-t/\tau} u(t) \right) * a(t; k, \mu, \sigma) \\
 &= \frac{P}{\tau} \left( e^{-t/\tau} u(t) \right) * \left( k e^{-kt} u(t) \right) * \left( \frac{1}{\sigma \sqrt{2\pi}} e^{-\frac{(t-\mu)^2}{2\sigma^2}} \right) \\
 &= \left( P \frac{k}{k\tau - 1} \left( e^{-t/\tau} - e^{-kt} \right) u(t) \right) * \left( \frac{1}{\sigma \sqrt{2\pi}} e^{-\frac{(t-\mu)^2}{2\sigma^2}} \right).
 \end{aligned} \tag{35}$$

169 Stopping here and replacing the Gaussian component with a delta function by letting  $\sigma \rightarrow 0$  yields

$$r(t) = P \frac{k}{k\tau - 1} \left( e^{-(t-\mu)/\tau} - e^{-k(t-\mu)} \right) u(t - \mu), \tag{36}$$

170 which includes both an initial phase where release rate ramps up after  $t = \mu$  and a decay phase where  
 171 release rate falls off exponentially. Note that the area under the curve, and thus the probability of  
 172 release, remains the same. For  $\sigma > 0$ , the final form of the release component looks like

$$r(t) = P \frac{k}{k\tau - 1} \left( e^{-\left(t - \left(\mu + \frac{\sigma^2}{2\tau}\right)\right)/\tau} \Phi\left(\frac{t - (\mu + \sigma^2/\tau)}{\sigma}\right) - e^{-k\left(t - \left(\mu + \frac{\sigma^2}{2}k\right)\right)} \Phi\left(\frac{t - (\mu + \sigma^2 k)}{\sigma}\right) \right), \quad (37)$$

173 which basically just adds a little extra rightward temporal shift and smooths out the corner in the profile  
 174 shape, due to replacing the step function of Eq (36) with the CDFs of two normal distributions. Fig 8 A-C  
 175 shows how this filter affects the shape of a release profile component.

### 176 **Facilitation Nonlinearities**

177 Release probability increases from the start of an action potential to its peak and from one spike to the  
 178 next because of the accumulation of  $\text{Ca}^{2+}$  on the sensor in the SNARE complex. Even when not enough  
 179  $\text{Ca}^{2+}$  has accumulated to trigger vesicle fusion on the first spike, it can still increase the probability of  
 180 reaching the releasable state after subsequent spikes. As can be seen in S8 Fig,  $\text{Ca}^{2+}$  entry from one spike  
 181 can predispose the distribution of bound states of the sensor to trigger release with greater alacrity on  
 182 subsequent spikes.

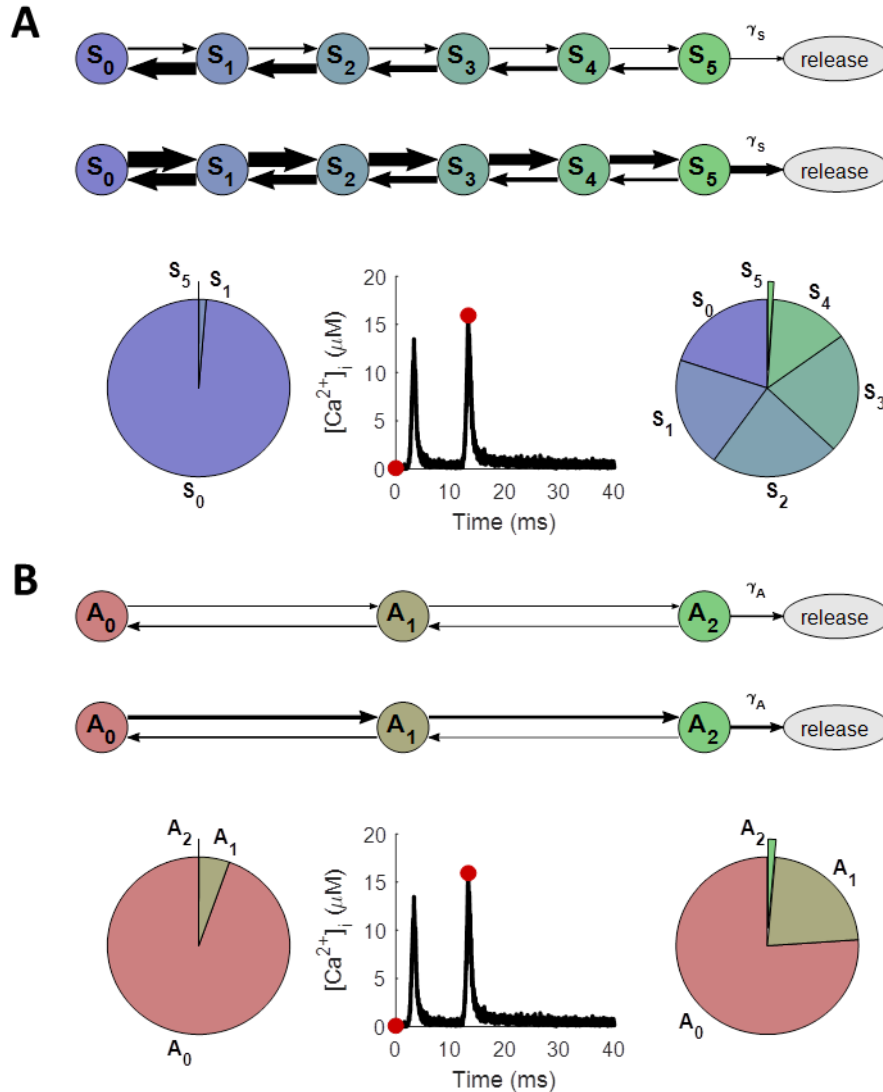

183  
184  
185  
186  
187  
188  
189  
190  
191  
192  
193  
194  
195  
196  
197

**S8 Fig. Change in the Balance of Binding Kinetics and Internal State Distribution of Ca<sup>2+</sup> Sensor with Spike History.**

State diagrams the same as shown in Fig 3. A: Synchronous state diagrams. At baseline [Ca<sup>2+</sup>]<sub>i</sub> (first red dot), unbinding kinetics (left arrows) overpower binding (right arrows), biasing Syt-1 toward unbound state (S<sub>0</sub>; top diagram), with almost no probability of having any Ca<sup>2+</sup> ions bound before an action potential (left pie chart). During peak Ca<sup>2+</sup> influx (second red dot), binding rates (thicker right arrows) overpower unbinding, biasing Syt-1 toward its fully-bound releasable state (S<sub>5</sub>; lower diagram), with much greater probability of having at least some Ca<sup>2+</sup> bound (right pie chart). B: The same for asynchronous release with Syt-7, whose releasable state requires two Ca<sup>2+</sup> ions bound (A<sub>2</sub>). Slower kinetics lead to only slight bias in favor of binding during an action potential (slightly thicker right arrows in lower diagram), leading to miniscule increase in probability of being in the releasable state on later spikes (right pie chart). Release becomes more probable on subsequent spikes because previous activity has pushed synaptotagmin into higher-bound states, making reaching the releasable state easier.

198 Simulations with the MCell model demonstrate how nonlinear binding cooperativity in the  $\text{Ca}^{2+}$  sensors  
 199 induces facilitation in excess of what would be expected from cytoplasmic  $\text{Ca}^{2+}$  buildup alone. S9 Fig  
 200 shows how the combined release rate from synchronous and asynchronous release mechanisms (dark  
 201 green: spike ramp; light green: probe spikes of different trains) grows far more quickly than does spike-  
 202 evoked  $[\text{Ca}^{2+}]_i$  (black/gray). Thus, the magnitude of facilitation may be nonlinear due to the internal  
 203 binding kinetics of the synaptotagmin.

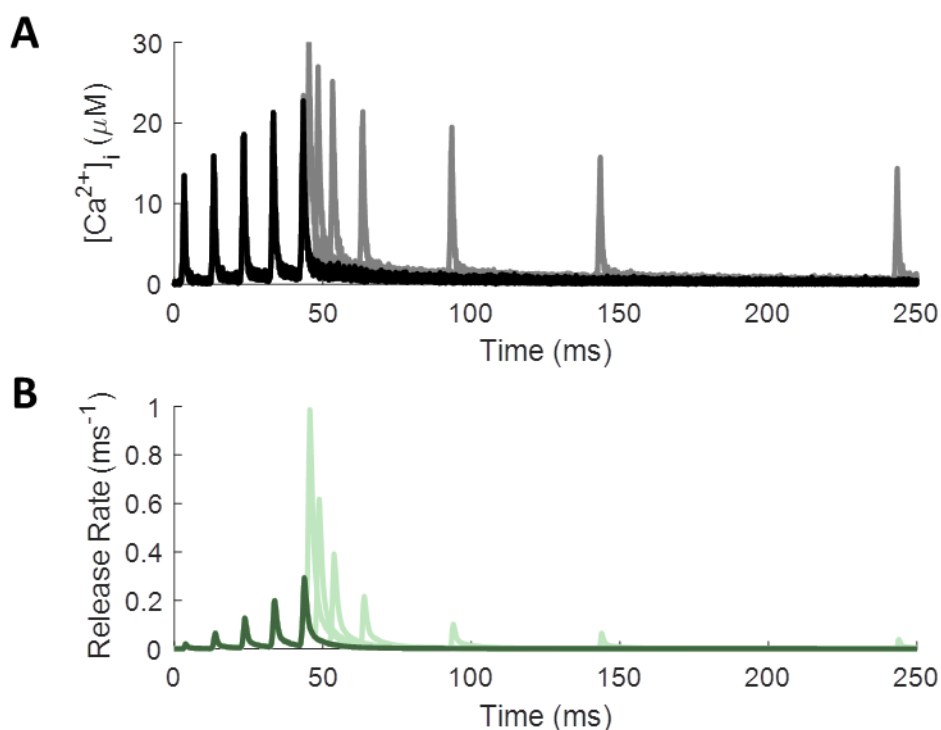

204 **S9 Fig. Empirical Facilitation in Release Probability is a Nonlinear Function of Spike**  
 205 **History and  $\text{Ca}^{2+}$  Buildup.**  
 206

207 A:  $[\text{Ca}^{2+}]_i$  and release rate in response to a 5-spike ramp stimulus with a 10-ms ISI (black and dark green),  
 208 followed by a single probe spike at increasing delay from the end of the ramp (gray and light green;  
 209 multiple cases overlaid on the same plot). Release rate grows much faster than  $\text{Ca}^{2+}$  buildup can account  
 210 for.

211  
 212 As described in Methods, we explored facilitation for 136 unique spike trains, each composed of a  
 213 constant-frequency spike ramp followed by a single probe spike at increasing interspike intervals (ISI). As  
 214 an example, S9 Fig overlays multiple spike trains, each with a spike ramp of 5 spikes with 10-ms ISI (dark

215 colors) and each with a separate probe spike at exponentially increasing ISI (light colors). To gain an  
216 intuition of how facilitation varies across different spike histories, we calculated the integrated release  
217 magnitude of the final spike of each train, according to

$$P(n) = \int_{t_{sn}}^{\infty} (r^*(t - t_{sn}) - r_0) dt = \sum_{c=1}^N P_c(n), \quad (38)$$

218 where  $t_{sn}$  is the time of spike  $n$ ,  $r^*(\cdot)$  is the empirical release rate function after this spike, given that no  
219 further activity occurs, and  $r_0$  is the spontaneous release rate. The empirical facilitation factor is simply  
220 the ratio of integrated release magnitude on spike  $n$  to that on spike 0:

$$F(n) = \frac{P(n)}{P(0)}, \quad (39)$$

221 Note that this empirical facilitation factor applies to the sum of all release components and does not  
222 correspond to any one component specifically. As can be seen in S10 Fig, empirical facilitation increases  
223 along a constant-frequency spike ramp and diminishes thereafter for increasing ISI of the following  
224 probe spike back toward baseline. However, the level of facilitation is not a simple function of the most  
225 recent activity but depends on the rate of stimulation prior to the last spike.



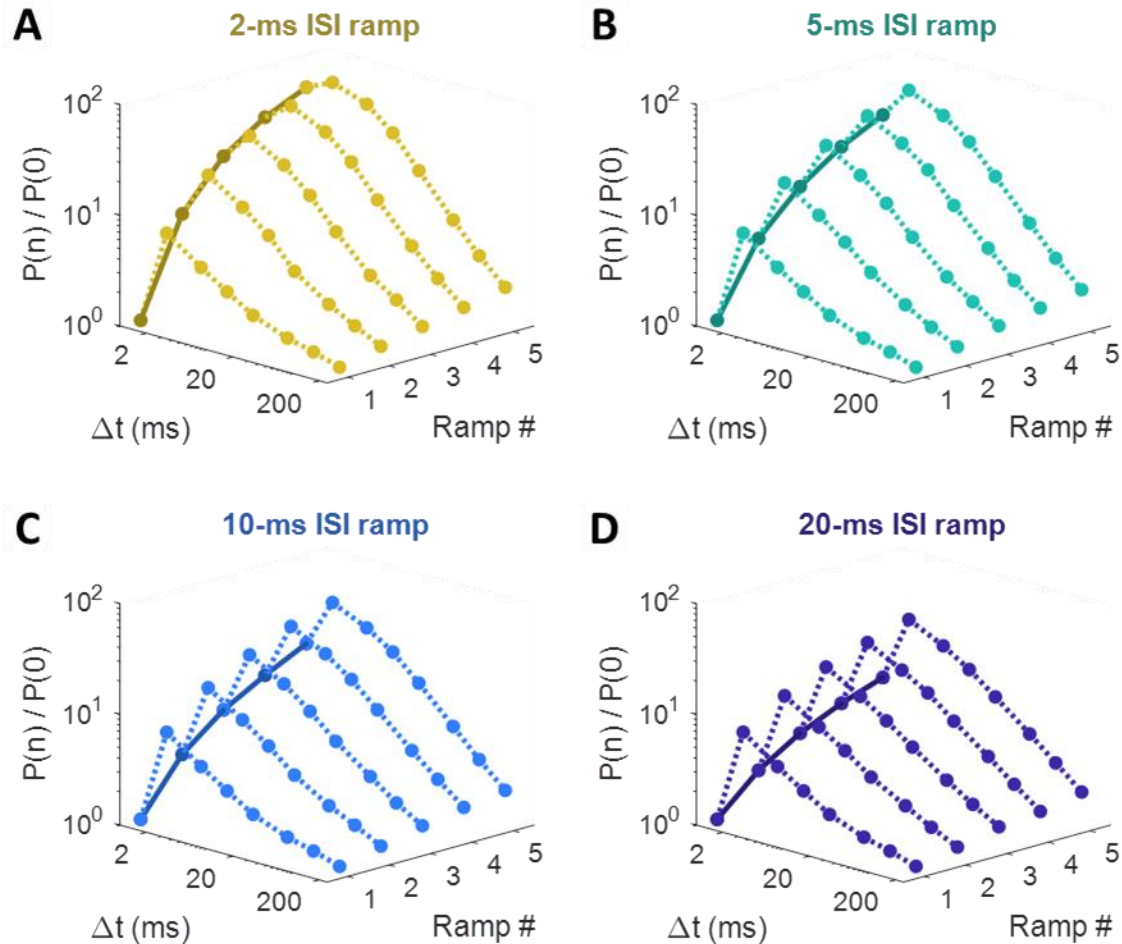

226  
 227 **S10 Fig. Empirical Facilitation in Release Probability is a Nonlinear Function of Spike**  
 228 **History.**

229 Integrated release fidelity ( $P(n)$ ) relative to baseline ( $P(0)$ ) for the various stimulus cases explored. Ramp  
 230 # indicates the number of spikes in the ramp preceding the probe spike, and  $\Delta t$  represents the ISI  
 231 between the last ramp spike and the probe spike. Spike history noticeably affects the growth of  
 232 facilitation, as seen for ramps with 2-ms ISIs (A), 5-ms ISIs (B), 10-ms ISIs (C), and 20-ms ISIs (D). Different  
 233 colors distinguish facilitation functions with different spike histories. Dark lines follow relative release  
 234 fidelity for spikes along spike ramps, and dotted lines follow relative release fidelity for probe spikes.  
 235

### 236 Intuitive Exploration of Facilitation Function Behavior

237 The facilitation function introduced in this paper includes a nonlinear component that prevents the  
 238 facilitation factor from exceeding some saturation limit. It does so by setting a limiting number of equal-  
 239 sized steps to saturation,  $N$ , and then decreasing each step size according to

$$f(n) = f(n-1)e^{-\Delta t/\tau} + 1 - \left( \frac{f(n-1)e^{-\Delta t/\tau}}{N} \right)^N, \quad F(n) = f(n)^\xi, \quad (40)$$

240 where  $f(n)$  is the facilitation function after  $n$  action potentials,  $\Delta t$  is the time since the previous spike,  $\tau$   
 241 is the facilitation decay time constant,  $\xi$  is the facilitation factor nonlinearity, and  $F(n)$  is the facilitation  
 242 factor to be multiplied by the release rate profile (see Eq (12)). Note that subscripts have been omitted  
 243 to focus on the facilitation of a single release component.

244 To gain a better intuition of this function, consider the limit as  $N \rightarrow \infty$ ,

$$f(n) = f(n-1)e^{-\Delta t/\tau} + 1, \quad F(n) = f(n)^\xi. \quad (41)$$

245 As stimulus frequency becomes unphysiologically high ( $\Delta t \rightarrow 0$ ), or as  $\tau \rightarrow \infty$ , the exponential decay  
 246 does not remove any facilitation between spikes and  $f(n) = f(n-1) + 1$ . In other words,

$$f(n|n \ll N) \approx n \Rightarrow F(n|n \ll N) \approx n^\xi \quad (42)$$

247 for sufficiently large  $N$  and small  $\Delta t/\tau$ . Although  $f(n)$  grows linearly for small  $n$ , the facilitation factor  
 248 eventually approaches its steady-state limit at

$$f(\infty) \approx N \Rightarrow F(\infty) \approx N^\xi \quad (43)$$

249 due to the third term of Eq (16) and (40). For cases with a smaller, constant frequency of stimulation,  
 250 the steady-state value for the facilitation component can be found by rearranging Eq (40) with  
 251  $f(n) = f(n-1) = f(\infty)$  and solving the polynomial

$$\left( N^{-N} \exp\left(-\frac{N\Delta t}{\tau}\right) \right) f(\infty)^N + \left( 1 - \exp\left(-\frac{\Delta t}{\tau}\right) \right) f(\infty) - 1 = 0. \quad (44)$$

252 For very large  $N$ , the first term approaches 0, yielding

$$f(\infty) = \left( 1 - \exp\left(-\frac{\Delta t}{\tau}\right) \right)^{-1} \Rightarrow F(\infty) = \left( 1 - \exp\left(-\frac{\Delta t}{\tau}\right) \right)^{-\xi}. \quad (45)$$

253 Thus, there is a finite, spike-frequency-dependent limit to facilitation even without the saturation  
254 parameter  $N$ . The function facilitates linearly for the first several spikes (for large enough  $N$ ) and then  
255 plateaus to some maximum value. For large enough  $N$  and  $\xi = 1$ , this set of functions acts as a simple  
256 convolution of an exponential with the spike times, so long as the  $\tau$  of facilitation decay (Eq (16), (40))  
257 exactly matches the  $\tau$  of release rate decay (Eq (1), (3)). This kind of linearity, however, is not observed  
258 in the release profiles studied in this paper. S11 Fig A shows how different values for  $N$  cause the  
259 otherwise linear step sizes to saturate at different levels. Importantly,  $N \geq 1$  ensures stable growth. S11  
260 Fig B shows how spike frequency also plays a role in determining the steady-state level of facilitation.

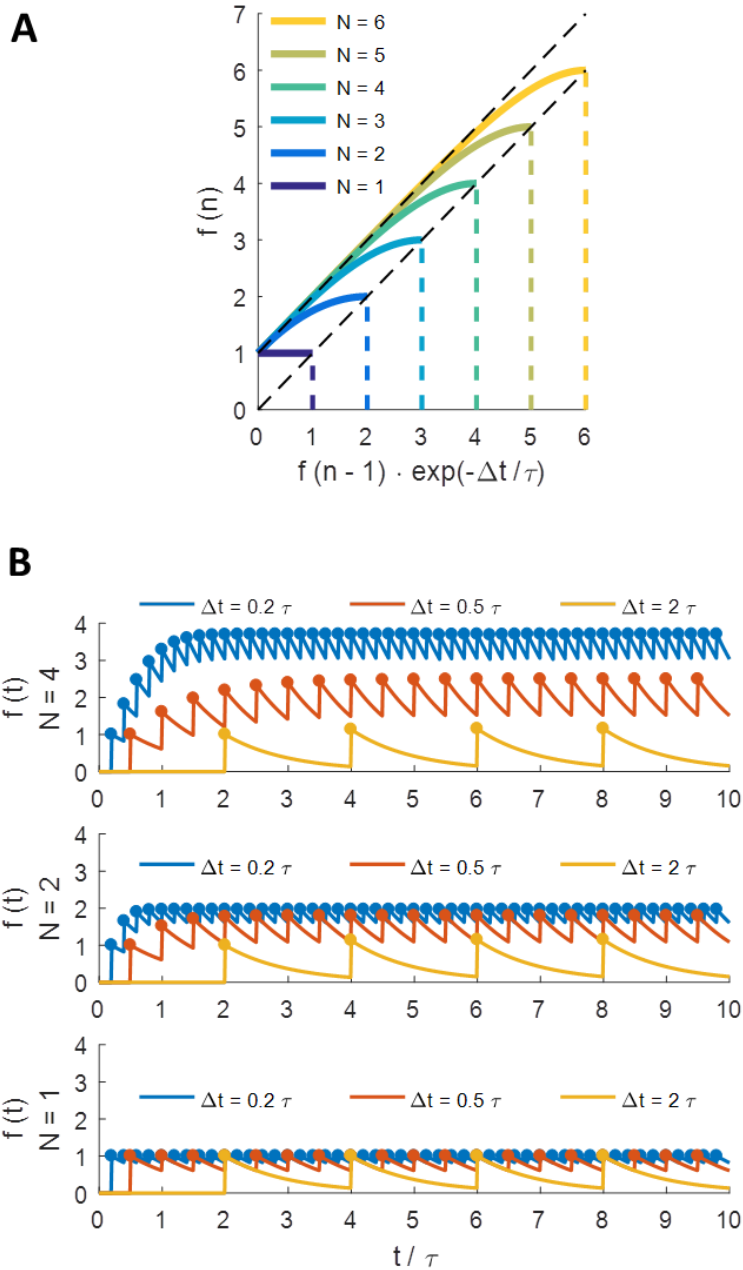

261  
 262  
 263  
 264  
 265  
 266  
 267  
 268

**S11 Fig. Saturation of Facilitation Parameters.**

A: Facilitation parameter  $f(\cdot)$  increases almost linearly from one spike ( $f(n-1)$ ) to the next ( $f(n)$ ), until it approaches some limit  $N \geq 1$ . B: Curves represent the unseen change in  $f(\cdot)$  between spikes. Dots represent actual values observed at spike times, values determined by the  $\text{Ca}^{2+}$ -triggered increment in release fidelity at each spike. Steady-state value for facilitation parameter limited by stimulus frequency and by value of  $N$ . No facilitation above baseline occurs for  $N=1$ .

269 Although we have considered facilitation always to be positive, this model provides the flexibility to  
270 allow negative facilitation. Whereas  $F(\infty) > 1$  for  $\xi > 0$ , giving positive facilitation as normal, using  
271  $\xi < 0$  causes  $F(\infty) < 1$ , producing depression in the parameter. For  $\xi = 0$ ,  $F(\infty) = 1$ , and no change  
272 can occur in the release-rate parameter. Such negative facilitation, although not observed in the  
273 magnitude of release rate for the Syt-1/7 mechanisms studied here, could apply in other circumstances  
274 to other parameters like time constants or rates that decrease with activity. For instance, short-term  
275 depression induced by  $\text{Ca}^{2+}$ -triggered inactivation of  $\text{Ca}^{2+}$  channels [62, 88-90] could be represented as  
276 second or third component of the facilitation function that has a negative value for  $\xi_{ci}$ . However, this  
277 feature was not included in the MCell simulations, so it is beyond the scope of the current paper.

## 278 **Goodness of Fit of Facilitation Models**

279 S12 Fig shows the fraction of the variance of the fitting error unexplained by the facilitation model (FVU  
280 error) for the final spikes of all 136 unique spike trains. Note how the highest error occurs with  
281 synchronous facilitation for interspike intervals (ISI) of 5 ms. More extensive exploration of facilitation  
282 space (i.e., longer spike trains with more diversity of spiking patterns) could elucidate an improved  
283 facilitation model that can achieve lower FVU error across all cases.

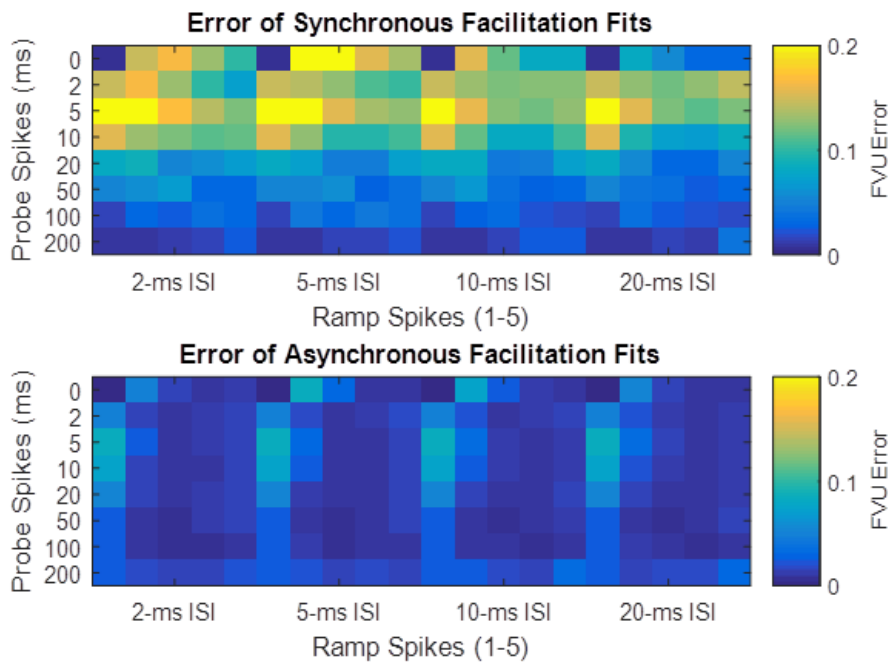

284  
 285 **S12 Fig. Release Rate Parameters and Facilitation Metaparameters Fitted to Empirical**  
 286 **Histogram Profiles.**  
 287 Errors across all cases in linear and logarithmic space for the predictive model.  
 288
